# Supplementary material for: Aryl Urea Based Scaffolds for Multitarget Drug Discovery in Anticancer Immunotherapies
Source: PubMed Central journal article supplement (PMC8067507; doi:10.3390/ph14040337), 2021-04-06

# Aryl Urea based Scaffolds for Multitarget Drug Discovery in Anticancer Immunotherapies

Celia Martín-Beltrán <sup>1</sup>, Raquel Gil-Edo <sup>1</sup>, German Hernández-Ribelles <sup>1</sup>, Raül Agut <sup>1</sup>, Pilar Marín-Mezquita <sup>1</sup>, Miguel Carda <sup>1,\*</sup> and Eva Falomir <sup>1,\*</sup>

<sup>1</sup> Depart. de Q. Inorgánica y Orgánica, Univ. Jaume I, E-12071 Castellón, Spain.

\* Correspondence: efalomir@uji.es; mcarda@uji.es

## *Supporting Information*

### *Contents:*

- S-2: Figure S1*  
*S-3/S-7: Analytical NMR spectra*  
*S-8/S-41: Graphical NMR data*

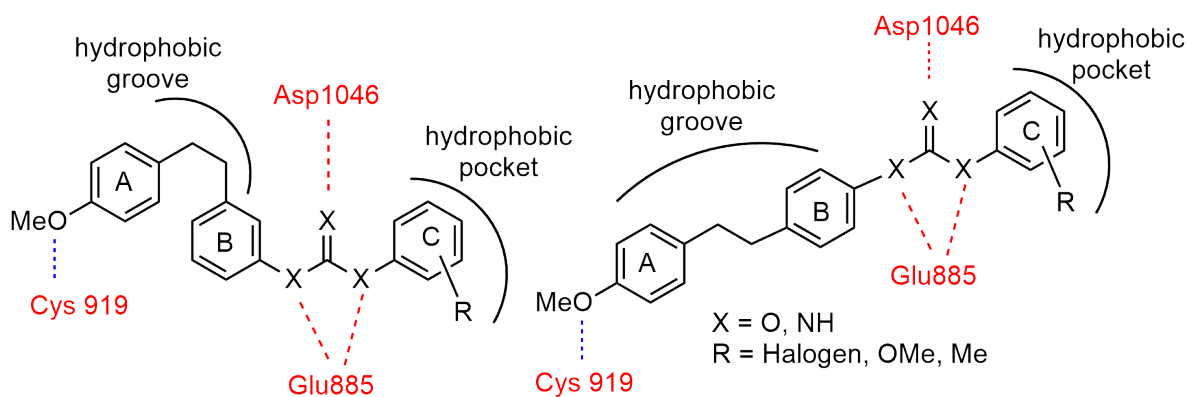

Figure S1. Scaffolds able to interact with the kinase domain of VEGFR-2 and PD-L1.

The hydrogen bonds that these compounds can establish with VEGFR-2 are indicated in red. The regions of the molecules that could interact with the hydrophobic pockets of both binding sites are also indicated.

## Analytical NMR spectra

**(Z)-1-(2-bromophenyl)-3-(3-(4-methoxystyryl)phenyl)urea (14):** Yield 41 %;  $^1\text{H}$  NMR (400 MHz,  $\text{DMSO-d}_6$ )  $\delta$  9.38 (s, 1H); 8.10 (s, 1H); 8.00 (dd,  $J = 8.0, 4.0$  Hz, 1H); 7.60 (d,  $J = 4.0$  Hz, 1H); 7.30 (d,  $J = 4.0$  Hz, 1H); 7.20 (dd,  $J = 8.0, 4.0$  Hz, 2H); 7.20-7.17 (m, 3H); 6.94 (dd,  $J = 12.0, 4.0$  Hz, 1H); 6.85 (d,  $J = 12.0$  Hz, 1H); 6.82 (d,  $J = 8.0$  Hz, 2H); 6.55 (d,  $J = 12.0, 8.0$  Hz, 2H); 3.70 (s, 3H);  $^{13}\text{C}$  NMR (100 MHz,  $\text{DMSO-d}_6$ )  $\delta$  158.4 (C); 152.0 (C); 139.6 (C); 138.0 (C); 137.0 (C); 132.4 (x2 CH); 129.9 (CH); 129.7 (C); 128.9 (C); 128.2 (C); 128.0 (C); 124.0 (C); 122.2 (CH); 118.0 (CH); 113.7 (CH); 113.0 (CH<sub>3</sub>) 55.1; IR  $\nu_{\text{max}}$  ( $\text{cm}^{-1}$ ) 3332 (NH), 1555 (CO); HR ESMS  $m/z$  423.0675  $[\text{M}+\text{Na}]^+$ . Calc. for  $\text{C}_{22}\text{H}_{19}\text{O}_2\text{N}_2\text{Br}$ , 423.0715.

**(Z)-1-(3-bromophenyl)-3-(3-(4-methoxystyryl)phenyl)urea (15):** Yield 62 %, white solid, m. p. 174 °C;  $^1\text{H}$  NMR (400 MHz,  $\text{DMSO-d}_6$ )  $\delta$  8.78 (s, 1H); 8.65 (s, 1H); 7.83 (s, 1H); 7.39-7.15 (m, 8H); 6.82 (t,  $J = 8.0$  Hz, 3H); 6.51 (d,  $J = 12.0$  Hz, 1H); 6.50 (d,  $J = 12.0$  Hz, 1H); 3.75 (s, 3H);  $^{13}\text{C}$  NMR (100 MHz,  $\text{DMSO-d}_6$ )  $\delta$  158.6 (C); 152.4 (C); 140.2 (C); 139.9 (C); 138.6 (C); 131.2 (CH<sub>x2</sub>); 130.0 (CH); 129.6 (CH); 128.4 (CH); 127.7 (CH<sub>x2</sub>); 124.9 (CH); 123.2 (CH); 122.8 (CH); 120.1 (CH<sub>x2</sub>); 118.2 (CH); 117.3 (CH); 113.5 (CH<sub>x2</sub>); 55.2 (CH<sub>3</sub>); IR  $\nu_{\text{max}}$  ( $\text{cm}^{-1}$ ) 3287 (NH), 1649 (CO); HR ESMS  $m/z$  423.0711  $[\text{M}+\text{H}]^+$ . Calc. for  $\text{C}_{22}\text{H}_{19}\text{O}_2\text{N}_2\text{Br}$ , 423.0715.

**(Z)-1-(4-bromophenyl)-3-(3-(4-methoxystyryl)phenyl)urea (16):** Yield 58 %, white solid, m. p. 173 °C;  $^1\text{H}$  NMR (400 MHz,  $\text{DMSO-d}_6$ )  $\delta$  8.75 (s, 1H); 8.63 (s, 1H); 7.41(d,  $J = 8.1$  Hz, 2H); 7.45-7.39 (m, 3H); 7.28-7.17 (m, 4H); 6.84-6.80 (m, 3H); 6.51 (dd,  $J = 12.0, 8.0$  Hz, 2H); 3.72 (s, 3H);  $^{13}\text{C}$  NMR (100 MHz,  $\text{DMSO-d}_6$ )  $\delta$  158.5 (C); 152.5 (C); 139.8 (C); 138.6 (C); 137.6 (C); 131.5 (CH x 2); 129.9 (CH); 129.6 (CH); 128.2 (CH); 127.5 (CH<sub>x2</sub>); 126.0 (CH); 122.5(CH); 122.2 (CH); 120.1 (CH<sub>x2</sub>); 118.1 (CH); 117.0 (CH); 113.8 (CH<sub>x2</sub>); 55.0 (CH<sub>3</sub>); IR  $\nu_{\text{max}}$  ( $\text{cm}^{-1}$ ) 3291 (NH), 1633 (CO); HR ESMS  $m/z$  423.0708  $[\text{M}+\text{H}]^+$ . Calc. for  $\text{C}_{22}\text{H}_{19}\text{O}_2\text{N}_2\text{Br}$ , 423.0711.

**(Z)-1-(2-methoxyphenyl)-3-(3-(4-methoxystyryl)phenyl)urea (17):** Yield 31 %; <sup>1</sup>H NMR (400 MHz, DMSO<sub>d6</sub>) δ 9.22 (s, 1H); 8.18 (s, 1H); 8.10 (d, *J* = 8.0 Hz, 1H); 7.29 (d, *J* = 8.0 Hz, 1H); 7.20 (s, 1H); 7.18-7.10 (m, 3H); 7.0 (d, *J* = 4.0 Hz, 1H); 6.94-6.86 (m, 3H); 6.83 (d, *J* = 4.0 Hz, 1H); 6.51 (dd, *J* = 12.0, 4.0 Hz, 1H); 3.4 (s, 3H); 3.3 (s, 3H); <sup>13</sup>C NMR (100 MHz, DMSO<sub>d6</sub>) δ 158.4 (C); 152.3 (C); 147.0 (C); 140.0 (C); 138.1 (C); 129.9 (2xCH); 129.6 (CH); 128.8 (C); 128.8 (CH); 128.2 (CH), 121.8 (CH); 121.7 (CH); 120.5 (CH); 118.2 (CH); 117.7 (CH); 116.7 (CH); 110.7 (CH); 55.7 (CH<sub>3</sub>); 55.0 (CH<sub>3</sub>); IR  $\nu_{\max}$  (cm<sup>-1</sup>) 3302 (NH), 1595 (CO); HR ESMS *m/z* 375.1867 [M+H]<sup>+</sup>. Calc. for C<sub>23</sub>H<sub>22</sub>O<sub>3</sub>N<sub>2</sub>, 375.1865.

**(Z)-1-(3-methoxyphenyl)-3-(3-(4-methoxystyryl)phenyl)urea (18):** Yield 61 %; <sup>1</sup>H NMR (400 MHz, DMSO<sub>d6</sub>) δ 8.61 (s, 1H); 8.57 (s, 1H); 7.38 (d, *J* = 12.0 Hz, 1H); 7.30 (s, 1H); 7.20-7.14 (m, 5H); 6.90 (d, *J* = 12.0 Hz, 1H); 6.85-6.81 (m, 3H); 6.51 (dd, *J* = 12.0, 8.0 Hz, 3H); 3.7 (s, 3H); 3.3 (s, 3H); <sup>13</sup>C NMR (100 MHz, DMSO<sub>d6</sub>) δ 158.4 (C); 152.3 (C); 147.0 (C); 140.0 (C); 138.1 (C); 129.6 (2xCH); 129.4 (CH); 129.2 (C); 128.5 (CH); 128.0 (CH), 121.7 (CH); 117.8 (CH); 116.7 (CH); 113.4 (CH); 110.2 (CH); 107.0 (CH), 103.7 (CH), 54.7 (CH<sub>3</sub>); 54.6 (CH<sub>3</sub>); IR  $\nu_{\max}$  (cm<sup>-1</sup>) 3307 (NH), 1595 (CO); HR ESMS *m/z* 375.1887 [M+H]<sup>+</sup>. Calc. for C<sub>23</sub>H<sub>22</sub>O<sub>3</sub>N<sub>2</sub>, 375.1866.

**(Z)-1-(4-methoxyphenyl)-3-(3-(4-methoxystyryl)phenyl)urea (19):** Yield 66 %; <sup>1</sup>H NMR (400 MHz, DMSO<sub>d6</sub>) δ 8.60 (s, 1H); 8.51 (s, 1H); 7.65 (s, 1H); 7.56 (d, *J* = 8.0 Hz, 2H); 7.37 (d, *J* = 8.0 Hz, 2H); 7.30-7.20 (m, 3H); 7.15 (d, *J* = 12.0 Hz, 2H); 6.95 (d, *J* = 8.0 Hz, 2H); 6.87 (d, *J* = 12.0 Hz, 2H); 3.78 (s, 3H); 3.72 (s, 3H); <sup>13</sup>C NMR (100 MHz, DMSO<sub>d6</sub>) δ 159.0 (C); 154.5 (C); 152.7 (C); 140.2 (C); 137.8 (C); 132.7 (CH); 129.6 (CH); 129.2 (C); 129.0 (CH); 128.0 (2xCH); 127.8 (CH); 126.3 (CH); 120.0 (2xCH); 119.6 (CH); 117.1 (CH); 115.8 (CH); 114.1 (CH); 114.0 (2xCH); 55.1 (2xCH<sub>3</sub>); IR  $\nu_{\max}$  (cm<sup>-1</sup>) 3310 (NH), 1575 (CO); HR ESMS *m/z* 375.1867 [M+H]<sup>+</sup>. Calc. for C<sub>23</sub>H<sub>22</sub>O<sub>3</sub>N<sub>2</sub>, 375.1856.

**(E)-1-(2-bromophenyl)-3-(3-(4-methoxystyryl)phenyl)urea (21):** Yield 13 %, white solid, m. p. 230-232 °C; <sup>1</sup>H NMR (400 MHz, DMSO<sub>d6</sub>) δ 9.48 (s, 1H); 8.15 (s, 1H); 8.09 (d, *J* = 8.0 Hz, 1H); 7.68 (s, 1H); 7.62 (d, *J* = 8.0 Hz, 1H); 7.56 (d, *J* = 8.0 Hz, 2H); 7.37-7.21 (m, 4H); 7.10 (d, *J* = 8.0 Hz, 2H); 6.98 (d, *J* = 8.03 Hz, 1H); 6.95 (d, *J* = 12.0 Hz, 2H), 3.78 (s, 3H); <sup>13</sup>C NMR (100 MHz, DMSO<sub>d6</sub>) δ 159.0 (C); 152.2 (C); 138.8 (C); 138.0 (C); 132.4 (C); 129.5 (C); 129.1 (C); 129.1 (CH); 128.1 (CH); 128.0 (x 2) (CH); 127.8 (CH); 126.1 (CH); 124.0 (CH); 121.9 (CH); 122.2 (CH); 120.1 (CH); 117.3 (CH); 115.9 (CH); 114.1 (x 2) (CH); 113.0, (CH); 55.0 (CH<sub>3</sub>); IR  $\nu_{\max}$  (cm<sup>-1</sup>) 3692 (NH), 1425 (CO); HR ESMS *m/z* 423.0677 [M+H]<sup>+</sup>. Calc. for C<sub>22</sub>H<sub>19</sub>O<sub>2</sub>N<sub>2</sub>Br, 423.0713.

**(E)-1-(3-bromophenyl)-3-(3-(4-methoxystyryl)phenyl)urea (22):** Yield 66 %; <sup>1</sup>H NMR (400 MHz, DMSO<sub>d6</sub>) δ 8.88 (s, 1H); 8.74 (s, 1H); 7.89 (s, 1H); 7.68 (s, 1H); 7.56 (d, *J* = 8.0 Hz, 2H); 7.32-7.29 (m, 6H); 7.10 (d, *J* = 12.0 Hz, 2H); 6.94 (d, *J* = 12.0 Hz, 2H); 3.78 (s, 3H); <sup>13</sup>C NMR (100 MHz, DMSO<sub>d6</sub>) δ 159.0 (C); 152.4 (C); 141.4 (C); 139.7 (C); 137.9 (C); 130.6 (CH); 129.5 (CH); 129.0 (CH); 128.0 (CH); 127.8 (CH); 126.2 (CH); 124.9 (CH); 121.7 (CH); 120.5 (CH); 117.5 (CH); 117.0 (CH); 116.1 (CH); 114.1 (CH); 55.1(CH<sub>3</sub>); IR ν<sub>max</sub> (cm<sup>-1</sup>) 3544 (NH), 1425 (CO); HR ESMS *m/z* 423.0867 [M+H]<sup>+</sup>. Calc. for C<sub>22</sub>H<sub>19</sub>O<sub>2</sub>N<sub>2</sub>Br, 423.0687.

**(E)-1-(4-bromophenyl)-3-(3-(4-methoxystyryl)phenyl)urea (23):** Yield 82 %; <sup>1</sup>H NMR (400 MHz, DMSO<sub>d6</sub>) δ 8.88 (s, 1H); 8.75 (s, 1H); 7.66 (s, 1H); 7.56 (d, *J* = 8.0 Hz, 2H); 7.45 (s, 4H); 7.25-7.21 (m, 3H); 7.12 (dd, *J* = 16.0, 12 Hz, 2H); 6.95 (d, *J* = 12.0 Hz, 2H); 3.78 (s, 3H); <sup>13</sup>C NMR (100 MHz, DMSO<sub>d6</sub>) δ 159.0 (C); 152.4 (C); 139.8 (C); 139.1 (C); 137.8 (C); 131.4 (CH); 129.5 (CH); 129.0 (CH); 128.0 (CH); 127.8 (CH); 126.2 (CH); 120.1 (CH); 120.0 (CH); 117.4 (CH); 116.1 (CH); 114.1 (CH); 113.1 (CH); 55.1 (CH<sub>3</sub>); IR ν<sub>max</sub> (cm<sup>-1</sup>) 3695(NH), 1431 (CO); HR ESMS *m/z* 423.0698 [M+H]<sup>+</sup>. Calc. for C<sub>22</sub>H<sub>19</sub>O<sub>2</sub>N<sub>2</sub>Br, 423.0656.

**(E)-1-(2-methoxyphenyl)-3-(3-(4-methoxystyryl)phenyl)urea (24):** Yield 31 %; <sup>1</sup>H NMR (400 MHz, DMSO<sub>d6</sub>) δ 9.33 (s, 1H); 8.25 (s, 1H); 8.15 (d, *J* = 4.0 Hz, 1H); 7.68 (s, 1H); 7.56 (d, *J* = 8.0 Hz, 2H); 7.27 (dd, *J* = 8.0, 4.0 Hz, 2H); 7.25 (d, *J* = 8.0 Hz, 1H); 7.19 (d, *J* = 8.0 Hz, 2H); 7.18-6.90 (m, 5H); 3.89 (s, 3H); 3.78 (s, 3H); <sup>13</sup>C NMR (100 MHz, DMSO<sub>d6</sub>) δ 159.0 (C); 152.4 (C); 147.6 (C); 140.0 (C); 137.9 (C); 129.6 (CH); 129.0 (CH); 128.7 (C); 128.0 (CH); 127.8 (x2 CH); 126.3 (CH); 121.8 (CH); 120.5 (CH); 119.7 (CH); 118.5 (CH); 117.0 (CH); 115.7 (CH); 114.5 (CH); 110.7 (CH); 55.7 (CH<sub>3</sub>); 55.1 (CH<sub>3</sub>); IR ν<sub>max</sub> (cm<sup>-1</sup>) 3313 (NH), 1593 (CO); HR ESMS *m/z* 375.1856 [M+H]<sup>+</sup>. Calc. for C<sub>23</sub>H<sub>22</sub>O<sub>3</sub>N<sub>2</sub>, 375.1861.

**(E)-1-(3-methoxyphenyl)-3-(3-(4-methoxystyryl)phenyl)urea (25):** Yield 45 %; <sup>1</sup>H NMR (400 MHz, DMSO<sub>d6</sub>) δ 8.73 (s, 1H); 8.69 (s, 1H); 7.65 (s, 1H); 7.56 (d, *J* = 8.0 Hz, 2H); 7.28-7.20 (m, 7H); 6.95 (d, *J* = 8.0 Hz, 3H); 6.56 (d, *J* = 12.0 Hz, 1H); 3.78 (s, 3H); 3.74 (s, 3H); <sup>13</sup>C NMR (100 MHz, DMSO<sub>d6</sub>) δ (C) 158.4 (C); 152.3 (C); 147.0 (C); 140.0 (C); 138.1 (C); 129.6 (2xCH); 129.4 (CH); 129.2 (C); 128.5 (CH); 128.0 (CH); 121.7 (CH); 117.8 (CH); 116.7 (CH); 113.4 (CH); 110.2 (CH); 107.0 (CH); 103.7 (CH); 54.7 (CH<sub>3</sub>); 54.6 (CH<sub>3</sub>); IR ν<sub>max</sub> (cm<sup>-1</sup>) 3307 (NH), 1595 (CO); HR ESMS *m/z* 375.1887 [M+H]<sup>+</sup>. Calc. for C<sub>23</sub>H<sub>22</sub>O<sub>3</sub>N<sub>2</sub>, 375.1866.

**(E)-1-(4-methoxyphenyl)-3-(3-(4-methoxystyryl)phenyl)urea (26):** Yield 70 %;  $^1\text{H}$  NMR (400 MHz,  $\text{DMSO}_{d6}$ )  $\delta$  8.55 (s, 1H); 8.45 (s, 1H); 8.23 (s, 1H); 7.99 (d,  $J = 8.0$  Hz, 2H); 7.90 (d,  $J = 12.0$  Hz, 2H); 7.83 (d,  $J = 12.0$  Hz, 1H); 7.67 (t,  $J = 8.0$  Hz, 2H); 7.62 (d,  $J = 8.0$  Hz, 1H); 7.53 (s, 1H); 7.39 (d,  $J = 8.0$  Hz, 2H); 7.32 (d,  $J = 12.0$  Hz, 2H); 4.27 (s, 3H); 4.32 (s, 3H);  $^{13}\text{C}$  NMR (100 MHz,  $\text{DMSO}_{d6}$ )  $\delta$  (C) 158,4 (C); 154.4 (C); 152.6 (C); 140.0 (C); 137.7 (C); 132.6 (2xCH); 129.9 (CH); 129.6 (C); 128.9 (CH); 128.7 (CH); 128.3 (CH); 121.6 (CH); 120.0 (2xCH); 117.9 (CH); 116,9 (CH); 114,0 (CH), 113,7 (CH), 55,1 (2xCH<sub>3</sub>); IR  $\nu_{\text{max}}$  ( $\text{cm}^{-1}$ ) 3320 (NH), 1565 (CO); HR ESMS  $m/z$  375.1869  $[\text{M}+\text{H}]^+$ . Calc. for  $\text{C}_{23}\text{H}_{22}\text{O}_3\text{N}_2$ , 375.1846.

**1-(2-bromophenyl)-3-(3-(4-methoxyphenethyl)phenyl)urea (28):** Yield 12 %;  $^1\text{H}$  NMR (400 MHz,  $\text{DMSO}_{d6}$ )  $\delta$  9.38 (s, 1H), 8.09 (d,  $J=8.0$  Hz 1H); 8.06 (s, 1H); 7.61 (d,  $J = 8.0$  Hz, 2H); 7.33 (s, 1H); 7.29 (t,  $J = 8.9$  Hz, 2H); 7.28 (d,  $J = 8.0$  Hz, 1H); 7.18 (t,  $J = 8.0$  Hz, 1H); 7.13 (d,  $J = 8.0$  Hz, 2H); 7.02 (t,  $J = 8.0$  Hz, 1H); 6.84 (d,  $J = 12.0$  Hz, 1H); 6.82 (d,  $J = 8.0$  Hz, 2 H); 3.70 (s, 3H); 2.81 (s, 4H);  $^{13}\text{C}$  NMR (100 MHz,  $\text{DMSO}_{d6}$ ) 157.4 (C); 152.3 (C); 142.2 (C); 141.4 (C); 139.3 (C); 133.3 (C); 130.7 (CH); 129.2 (2xCH); 128.6 (CH); 124.3 (CH); 122.3 (CH); 121.7 (C); 120.3 (CH); 118.3 (CH); 117.0 (CH); 116.0 (CH); 113.6 (2xCH); 54.9 (CH<sub>3</sub>); 37.5 (CH<sub>2</sub>); 36.1 (CH<sub>2</sub>). IR  $\nu_{\text{max}}$  ( $\text{cm}^{-1}$ ) 3301 (NH), 1645 (CO); HR ESMS  $m/z$  425.08778 $[\text{M}+\text{H}]^+$ . Calc. for  $\text{C}_{22}\text{H}_{21}\text{N}_2\text{O}_2$ , 425.0866.

**1-(3-bromophenyl)-3-(3-(4-methoxyphenethyl)phenyl)urea (29):** Yield 14 %;  $^1\text{H}$  NMR (400 MHz,  $\text{DMSO}_{d6}$ )  $\delta$  8.84 (s, 1H); 8.66 (s, H); 7.87 (t,  $J = 2.1$  Hz, 1H); 7.4 (t,  $J = 2.1$  Hz, 1H); 7.25-7.12 (m, 7H); 6.84-6.82 (m, 3H); 3.71 (s, 3H); 2.81 (s, 4H);  $^{13}\text{C}$  NMR (100 MHz,  $\text{DMSO}_{d6}$ )  $\delta$  157.4 (C); 152.3 (C); 142.2 (C); 141.4 (C); 139.3 (C); 133.3 (C); 130.7 (CH); 129.2 (2xCH); 128.6 (CH); 124.3 (CH); 122.3 (CH); 121.7 (C); 120.3 (CH); 118.3 (CH); 117.0 (CH); 116.0 (CH); 113.6 (2xCH); 54.9 (CH<sub>3</sub>); 37,5 (CH<sub>2</sub>); 36,1 (CH<sub>2</sub>).; IR  $\nu_{\text{max}}$  ( $\text{cm}^{-1}$ ) 3304 (NH), 1633 (CO); HR ESMS  $m/z$  425.08473  $[\text{M}+\text{Na}]^+$ . Calc. for  $\text{C}_{22}\text{H}_{21}\text{BrN}_2\text{O}_2$ , 425.0865.

**1-(4-bromophenyl)-3-(3-(4-methoxyphenethyl)phenyl)urea (30):** Yield 27 %;  $^1\text{H}$  NMR (400 MHz,  $\text{DMSO}_{d6}$ )  $\delta$  8.80 (s, 1H); 8.70 (s, 1H); 7.42 (s, 4H); 7.31 (s, 1H); 7.30 (t,  $J = 7.5$  Hz, 1H); 7.25 (m, 3H); 7.18 (d,  $J = 7.5$  Hz, 3H); 3.71 (s, 3H); 2.81 (s, 4H);  $^{13}\text{C}$  NMR (100 MHz,  $\text{DMSO}_{d6}$ )  $\delta$  157.4 (C); 152.4 (C); 142.2 (C); 139.4 (C); 139.2 (C); 133.3 (C); 131.5 (CH); 129.3 (2xCH); 128.6 (CH); 122.2 (CH); 122.0 (CH); 120.1 (CH); 118.3 (CH); 115.9 (CH); 113.6 (2xCH); 113.1 (CH); 54.9 (CH<sub>3</sub>); 37.4 (CH<sub>2</sub>); 36.1 (CH<sub>2</sub>).; IR  $\nu_{\text{max}}$  ( $\text{cm}^{-1}$ ) 3290 (NH), 1638 (CO); HR ESMS  $m/z$  425.0877  $[\text{M}-\text{H}]^-$ . Calc. for  $\text{C}_{22}\text{H}_{21}\text{BrN}_2\text{O}_2$ , 425.0865.

**1-(2-methoxyphenyl)-3-(3-(4-methoxyphenethyl)phenyl)urea (31):** Yield 83 %;  $^1\text{H}$  NMR (400 MHz,  $\text{DMSO-d}_6$ )  $\delta$  9.24 (s, 1H); 8.20 (s, 1H); 8.13 (d,  $J = 8.0$  Hz, 1H); 7.33 (s, 1H); 7.26 (d,  $J = 8.10$  Hz, 1H); 7.17-7.13 (m, 3H); 7.02-6.82 (m, 4H); 3.88 (s, 3H); 3.71 (s, 3H); 2.81 (s, 4H);  $^{13}\text{C}$  NMR (100 MHz,  $\text{DMSO-d}_6$ )  $\delta$  157.6 (C); 152.6 (C); 147.9 (C); 142.4 (C); 139.8 (C); 133.5 (C); 129.5 (2xCH); 128.9 (CH); 128.8 (C); 122.2 (CH); 122.1 (CH); 120.7 (CH); 118.5 (CH); 118.1 (CH); 115.8 (CH); 113.8 (2xCH); 110.9 (CH); 55.9 ( $\text{CH}_3$ ); 55.1 ( $\text{CH}_3$ ); 37.6 ( $\text{CH}_2$ ); 36.2 ( $\text{CH}_2$ ); IR  $\nu_{\text{max}}$  ( $\text{cm}^{-1}$ ) 3301 (NH), 1645 (CO); HR ESMS  $m/z$  377.1867  $[\text{M}+\text{H}]^+$ . Calc. for  $\text{C}_{23}\text{H}_{24}\text{O}_3\text{N}_2$ , 377.1865.

**1-(3-methoxyphenyl)-3-(3-(4-methoxyphenethyl)phenyl)urea (32):** Yield 69 %;  $^1\text{H}$  NMR (400 MHz,  $\text{DMSO-d}_6$ )  $\delta$  8.70 (s, 1H); 8.56 (s, 1H); 7.33 (s, 1H); 7.25 (dd,  $J = 8.0, 4.0$  Hz, 1H); 7.19-7.13 (m, 5H); 6.93 (d,  $J = 8.0$  Hz, 1H); 6.83 (d,  $J = 8.0$  Hz, 3H); 6.55 (d,  $J = 8.0$  Hz, 1H); 3.73 (s, 3H); 3.71 (s, 3H); 2.80 (s, 4H);  $^{13}\text{C}$  NMR (100 MHz,  $\text{DMSO-d}_6$ )  $\delta$  159.7 (C); 157.4 (C); 152.4 (C); 142.2 (C); 141.0 (C); 139.5 (C); 133.4 (C); 129.5 (CH); 129.3 (2xCH); 128.6 (CH); 122.0 (CH); 118.2 (CH); 115.8 (CH); 113.6 (2xCH); 110.5 (CH); 107.2 (CH); 103.9 (CH); 54.9 (2x $\text{CH}_3$ ); 37.5 ( $\text{CH}_2$ ); 36.1 ( $\text{CH}_2$ ); IR  $\nu_{\text{max}}$  ( $\text{cm}^{-1}$ ) 3304 (NH), 1633 (CO); HR ESMS  $m/z$  377.1866  $[\text{M}+\text{H}]^+$ . Calc. for  $\text{C}_{23}\text{H}_{24}\text{N}_2\text{O}_3$ , 377.1865.

**1-(4-methoxyphenyl)-3-(3-(4-methoxyphenethyl)phenyl)urea (33):** Yield 98 %;  $^1\text{H}$  NMR (400 MHz,  $\text{DMSO-d}_6$ )  $\delta$  8.5 (s, 1H); 8.4 (s, H); 7.3 (t,  $J = 8.2$  Hz, 3H); 7.2 (d,  $J = 8.2$  Hz, 1H); 7.1 (t,  $J = 8.3$  Hz, 3H); 6.8 (m, 5H); 3.7 (s, 3H); 2.8 (s, 4H);  $^{13}\text{C}$  NMR (100 MHz,  $\text{DMSO-d}_6$ )  $\delta$  157.4 (C); 154.4 (C); 152.7 (C); 142.1 (C); 139.8 (C); 133.4 (C); 132.7 (C); 129.2 (2xCH); 128.5 (CH); 121.8 (CH); 119.9 (2xCH); 118.0 (CH); 115.7 (CH); 113.9 (2xCH); 113.6 (2xCH); 55.1 ( $\text{CH}_3$ ); 54.9 ( $\text{CH}_3$ ); 37.5 ( $\text{CH}_2$ ); 36.1 ( $\text{CH}_2$ ); IR  $\nu_{\text{max}}$  ( $\text{cm}^{-1}$ ) 3290 (NH), 1638 (CO); HR ESMS  $m/z$  377.1868  $[\text{M}-\text{H}]^-$ . Calc. for  $\text{C}_{23}\text{H}_{24}\text{N}_2\text{O}_3$ , 377.1865.

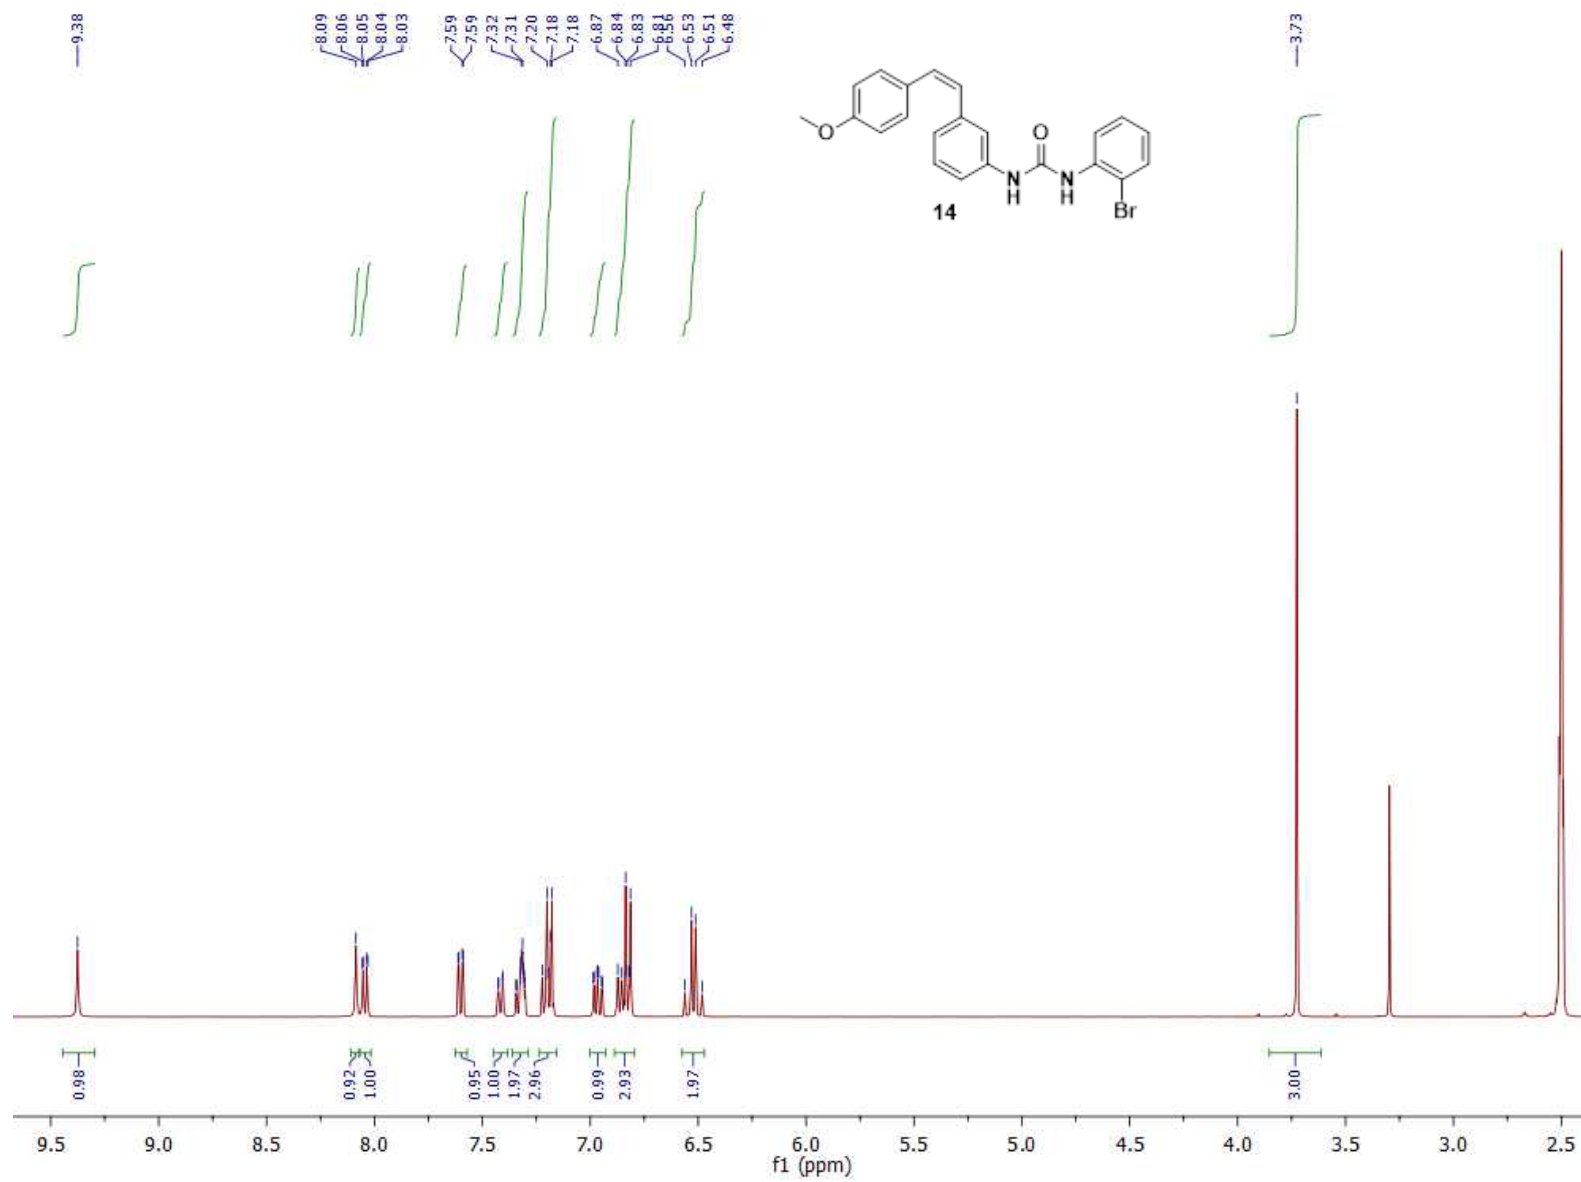



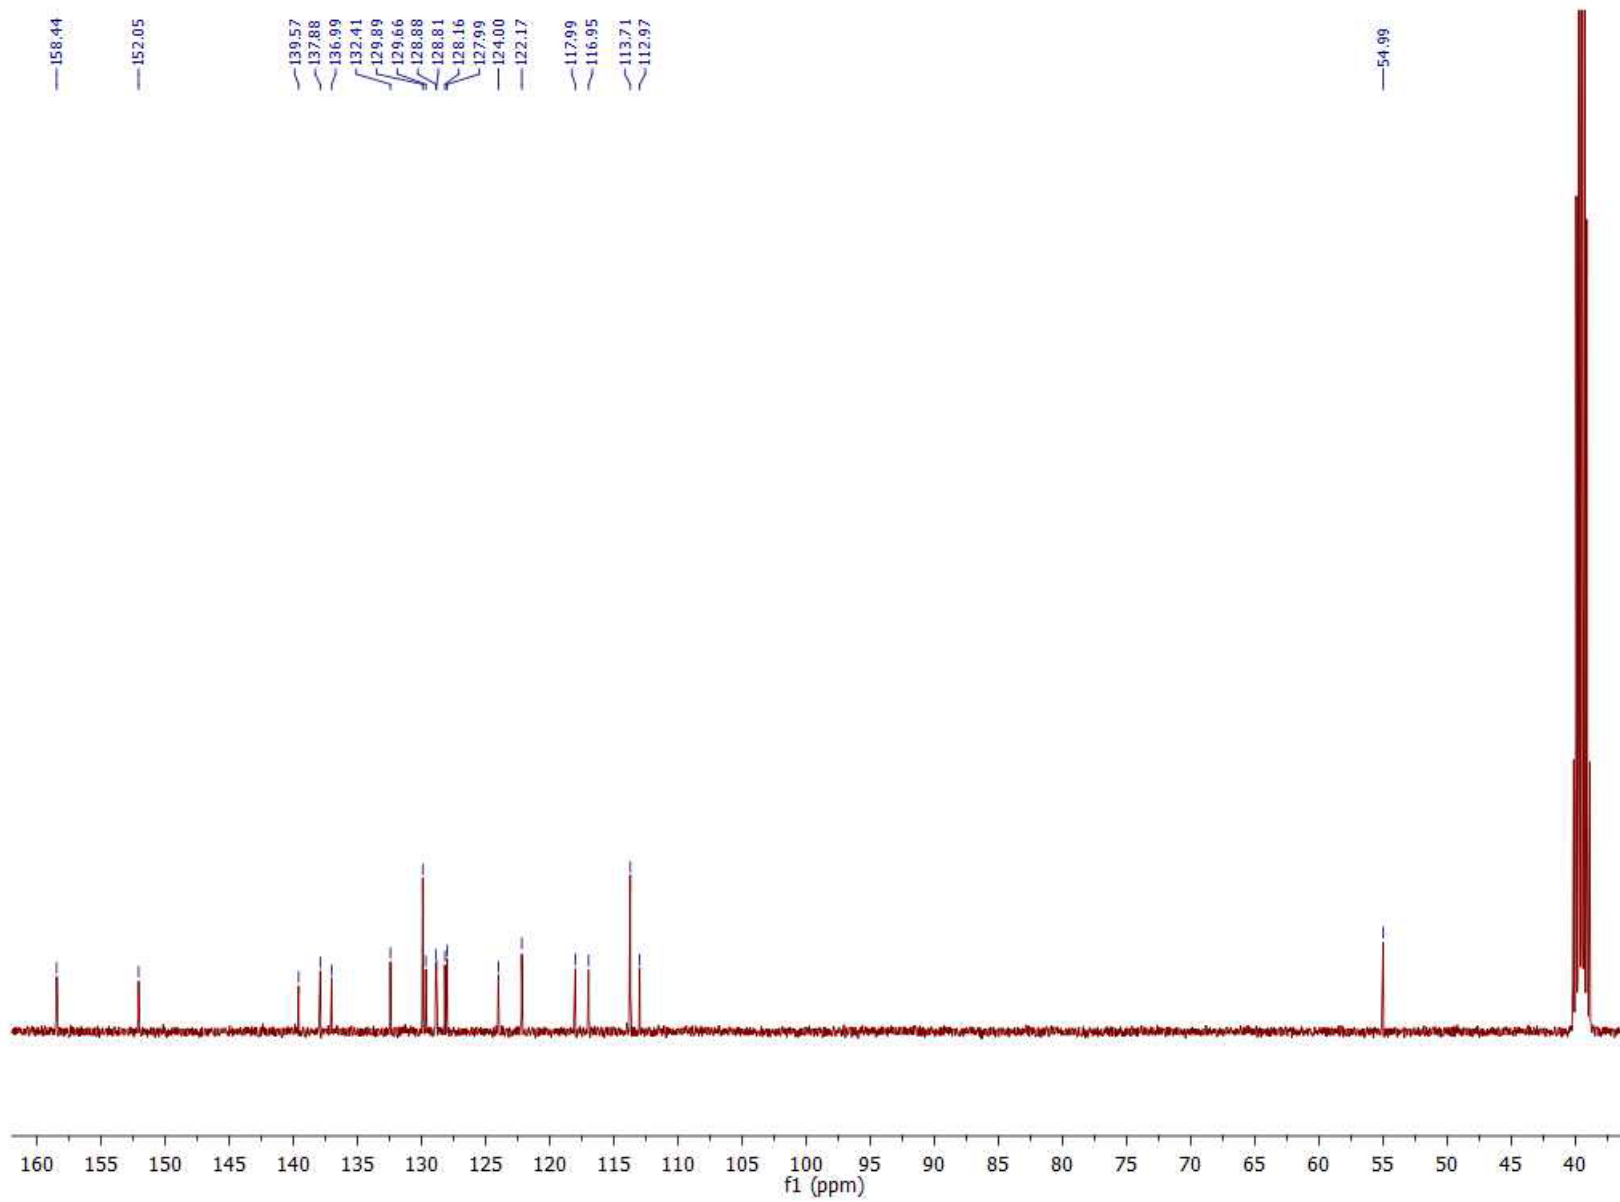

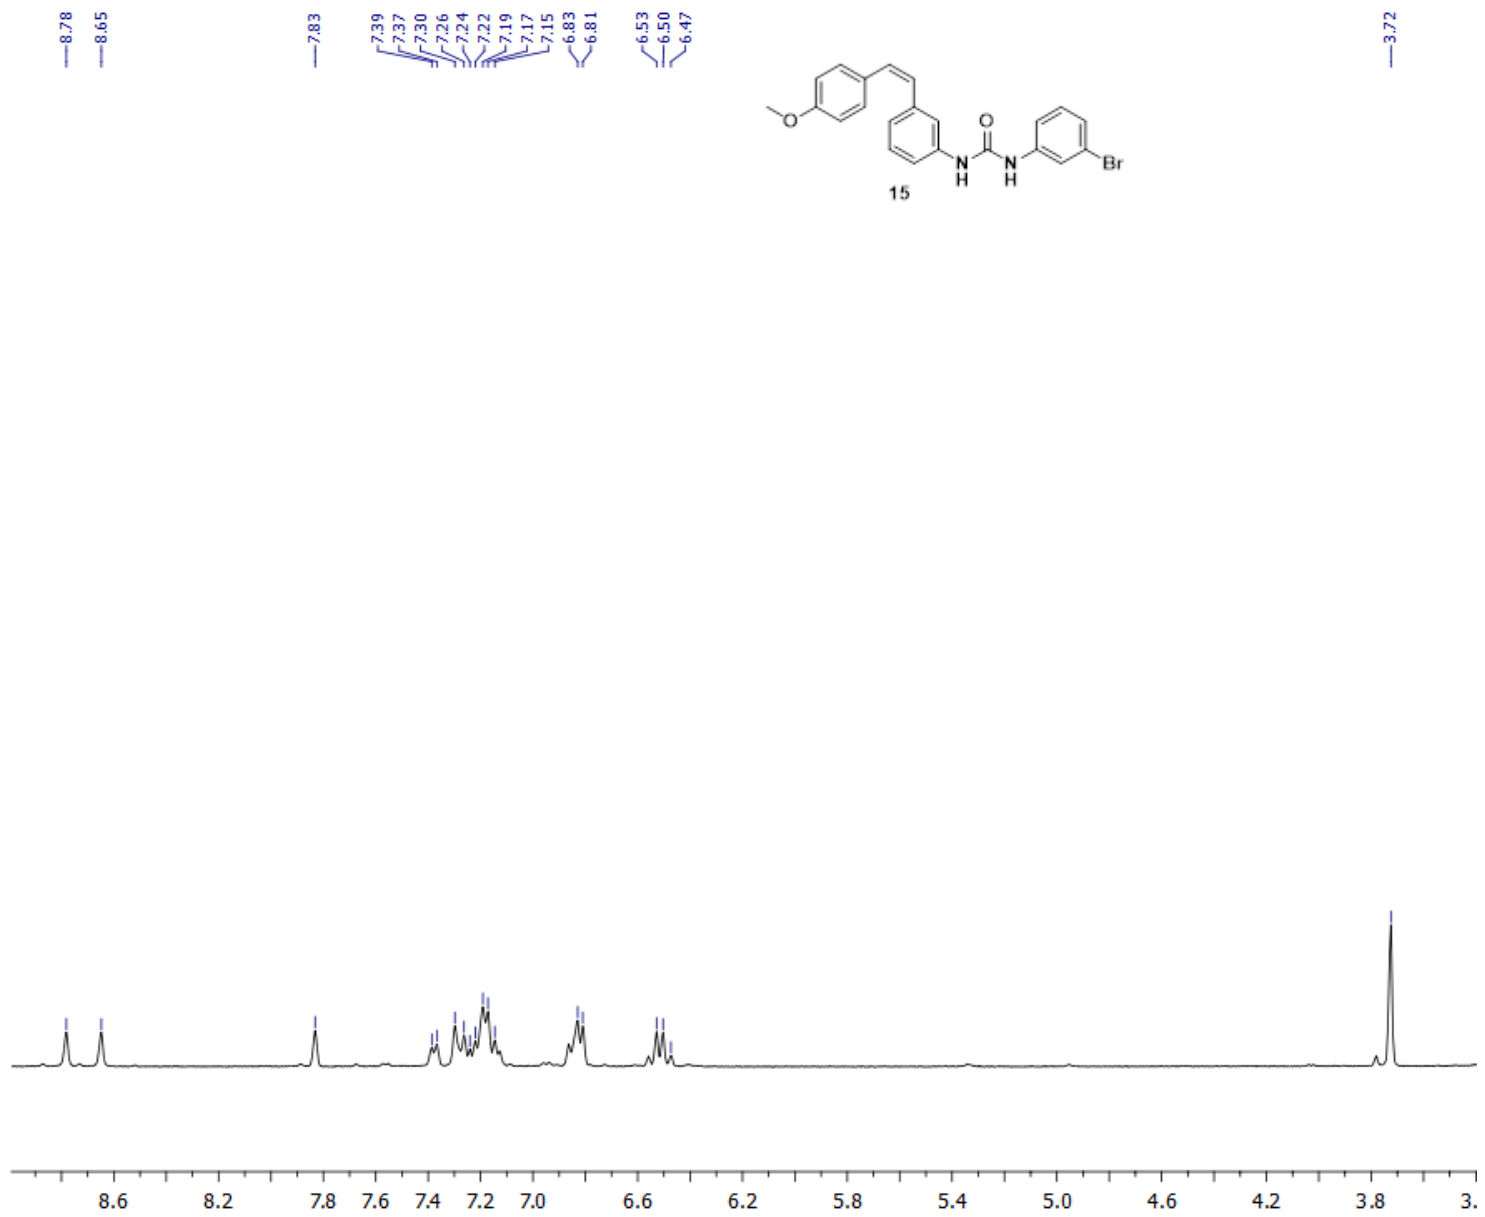

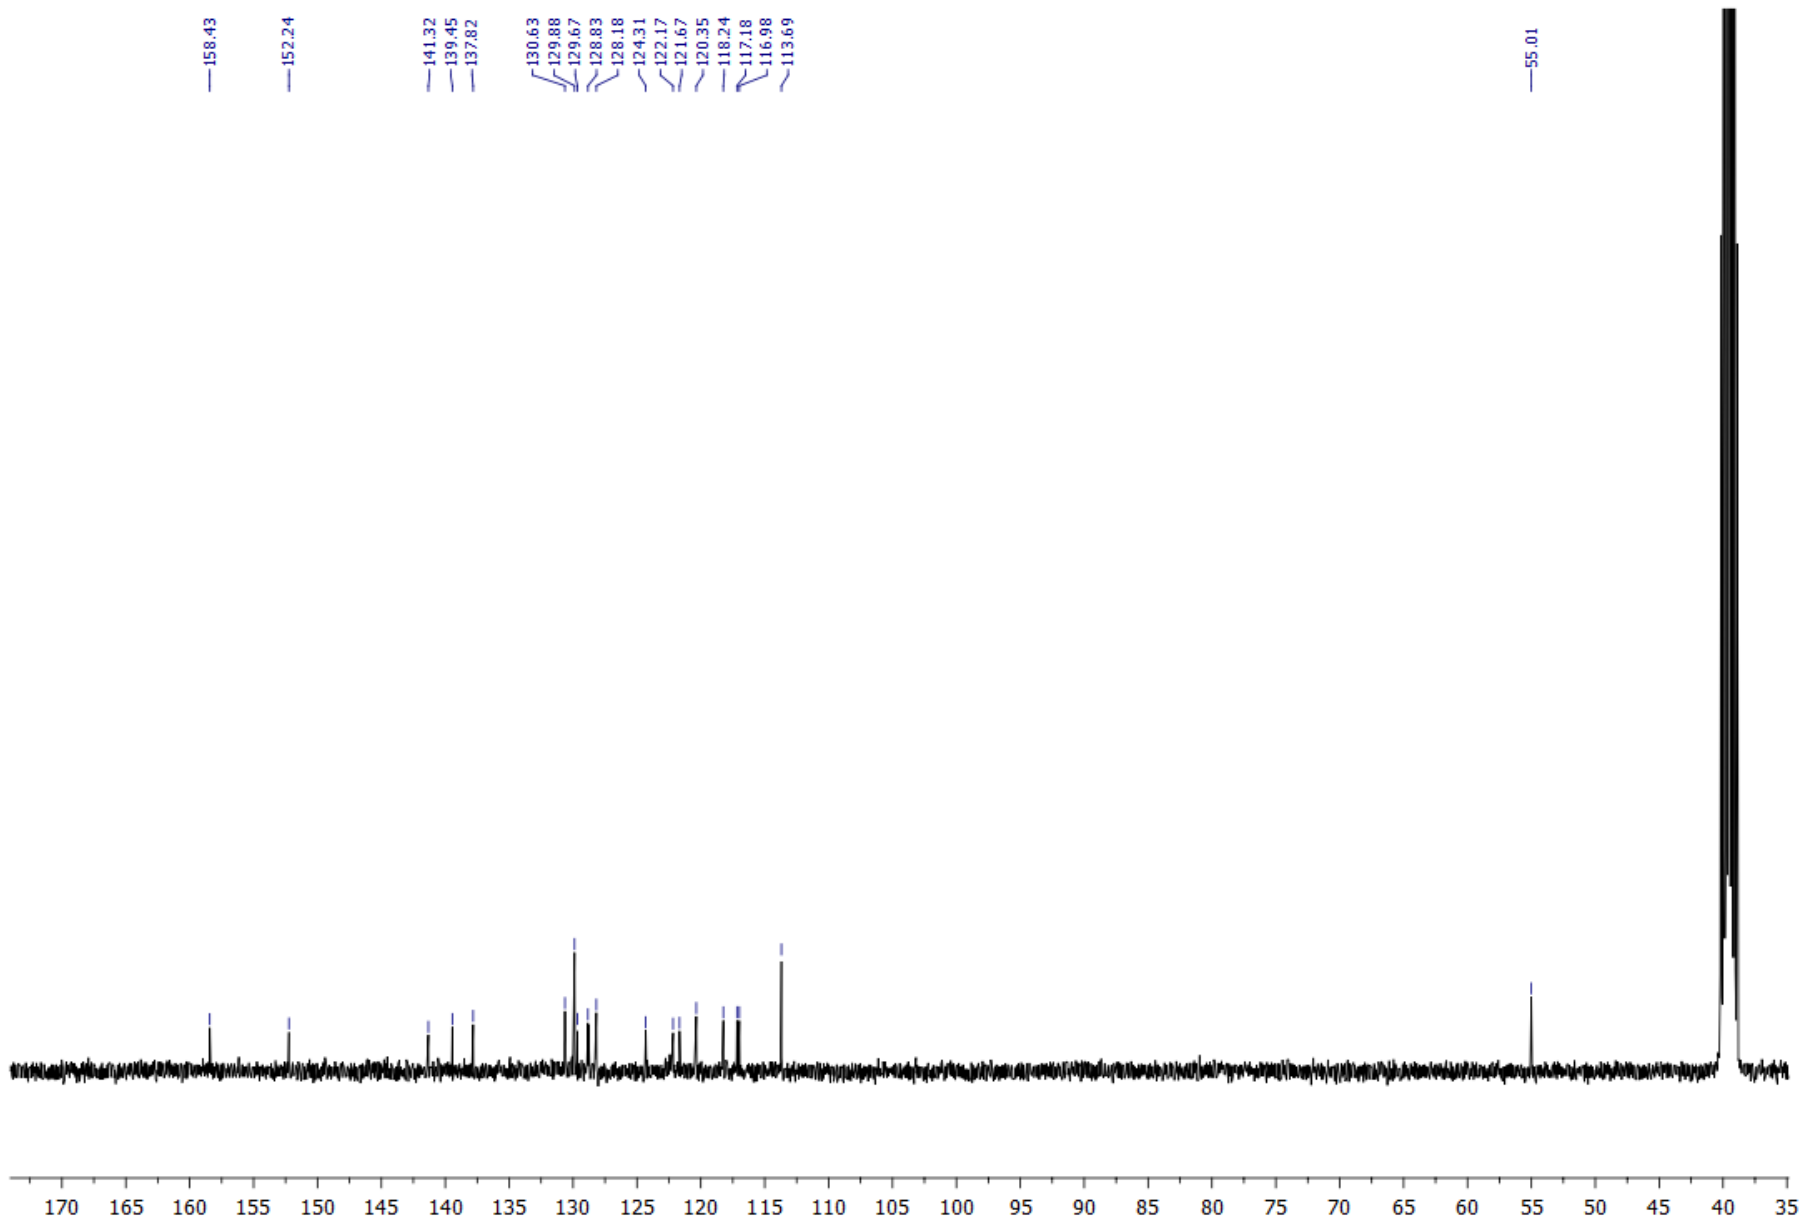

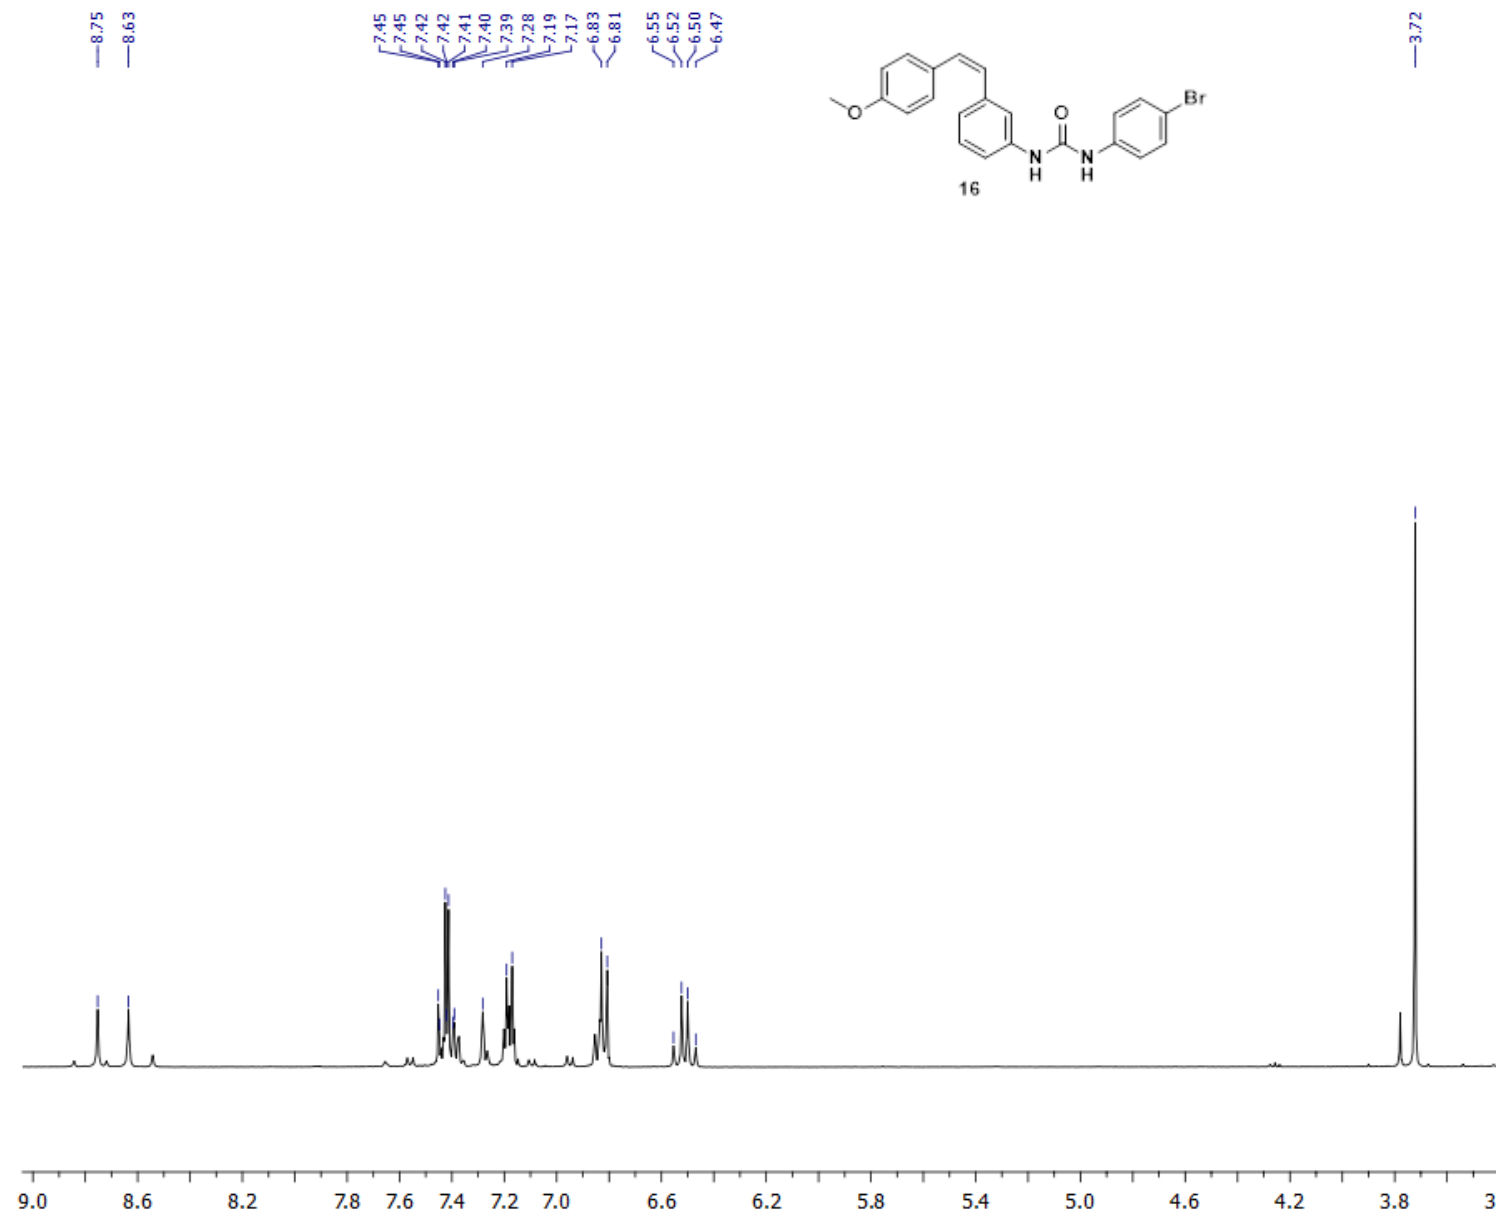

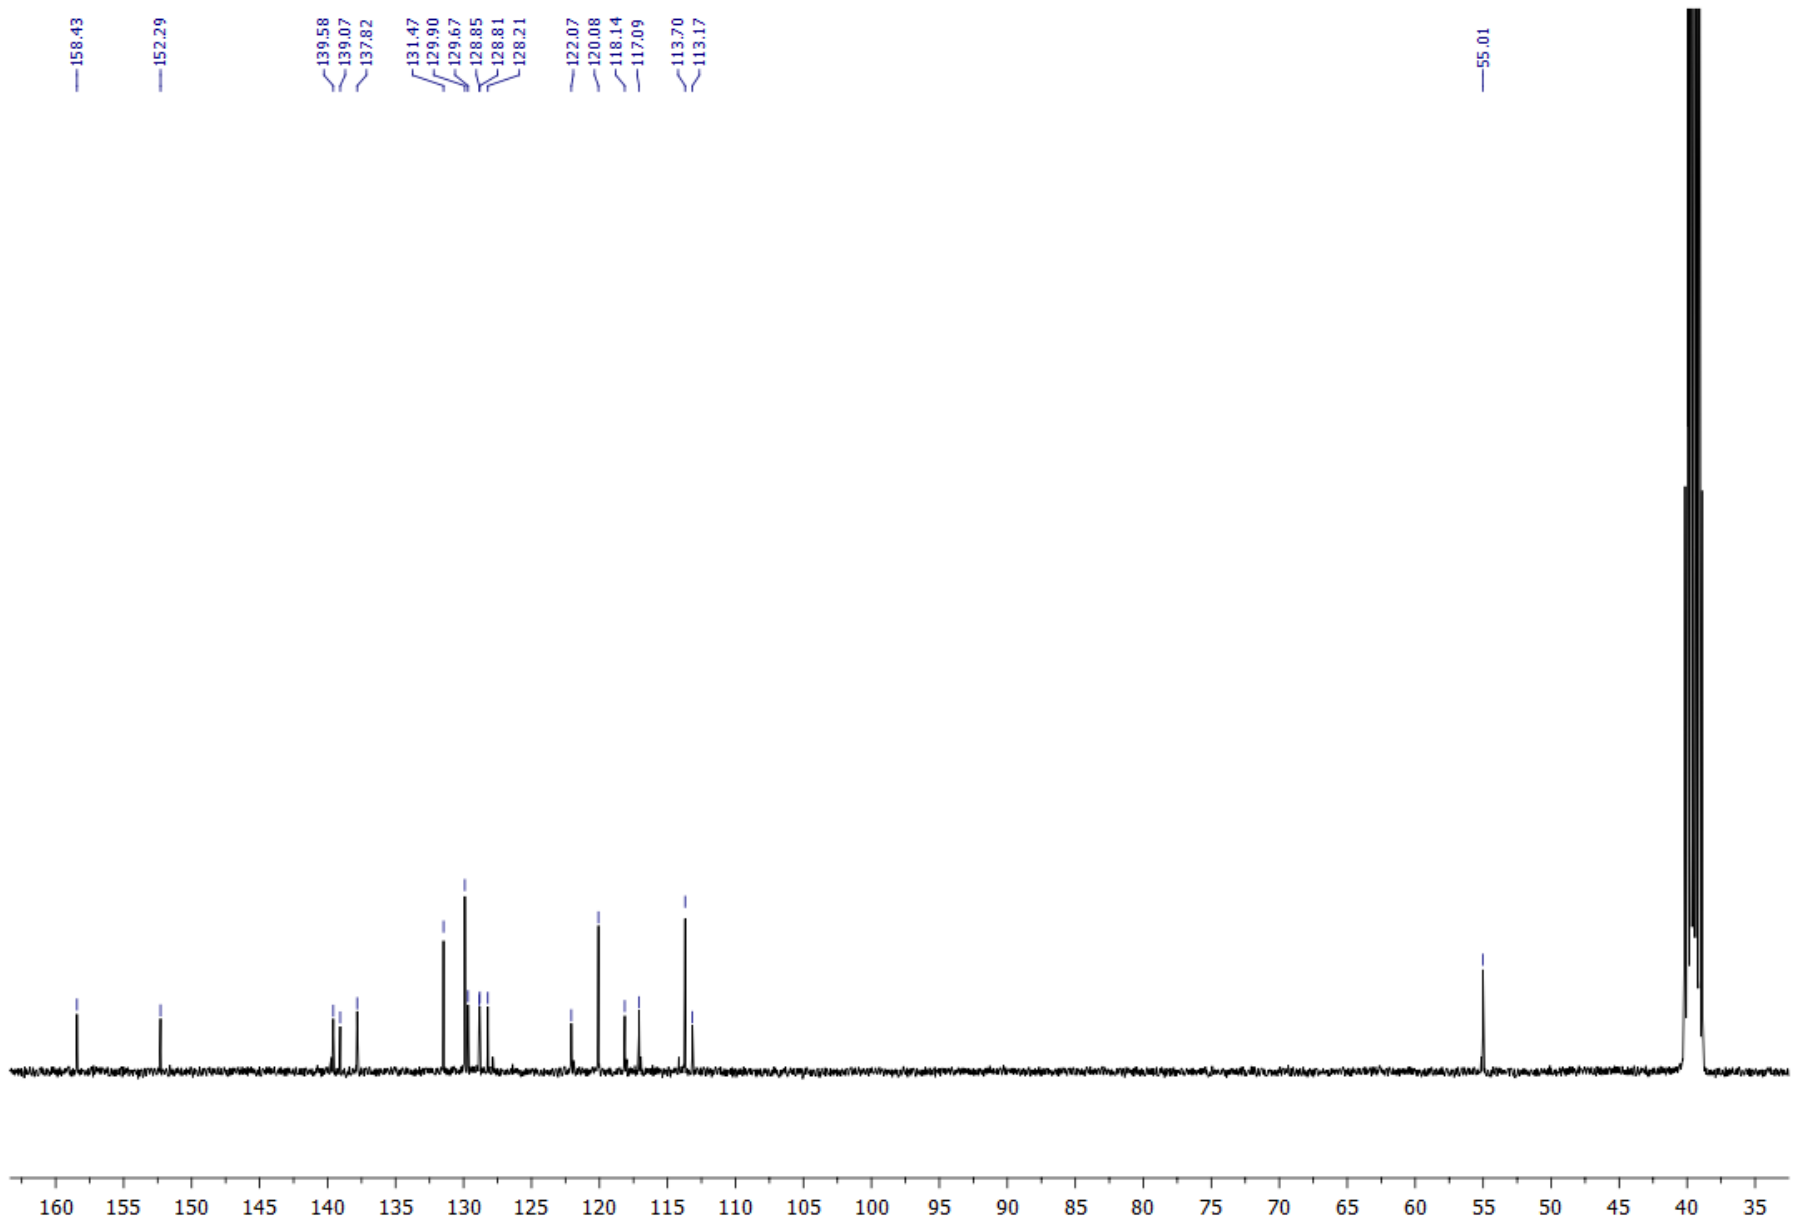

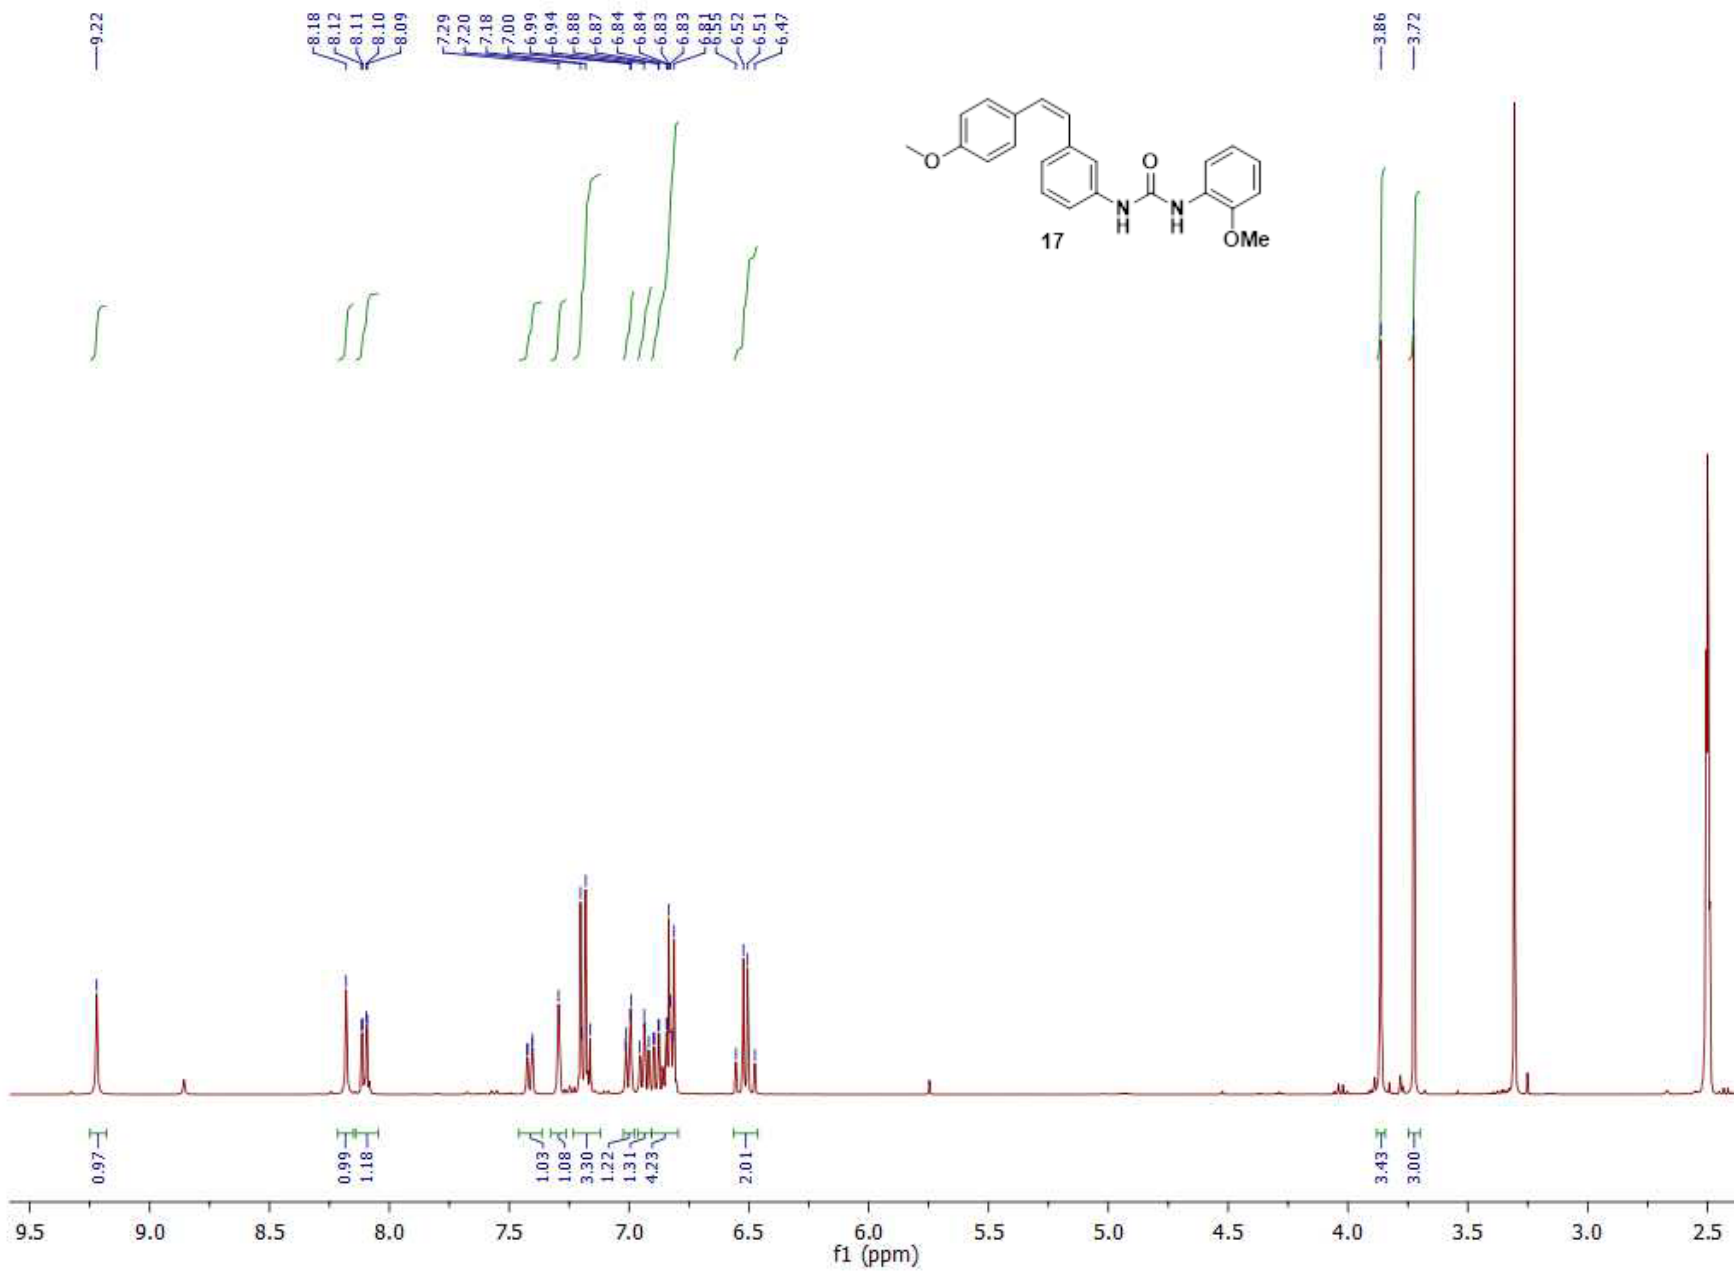

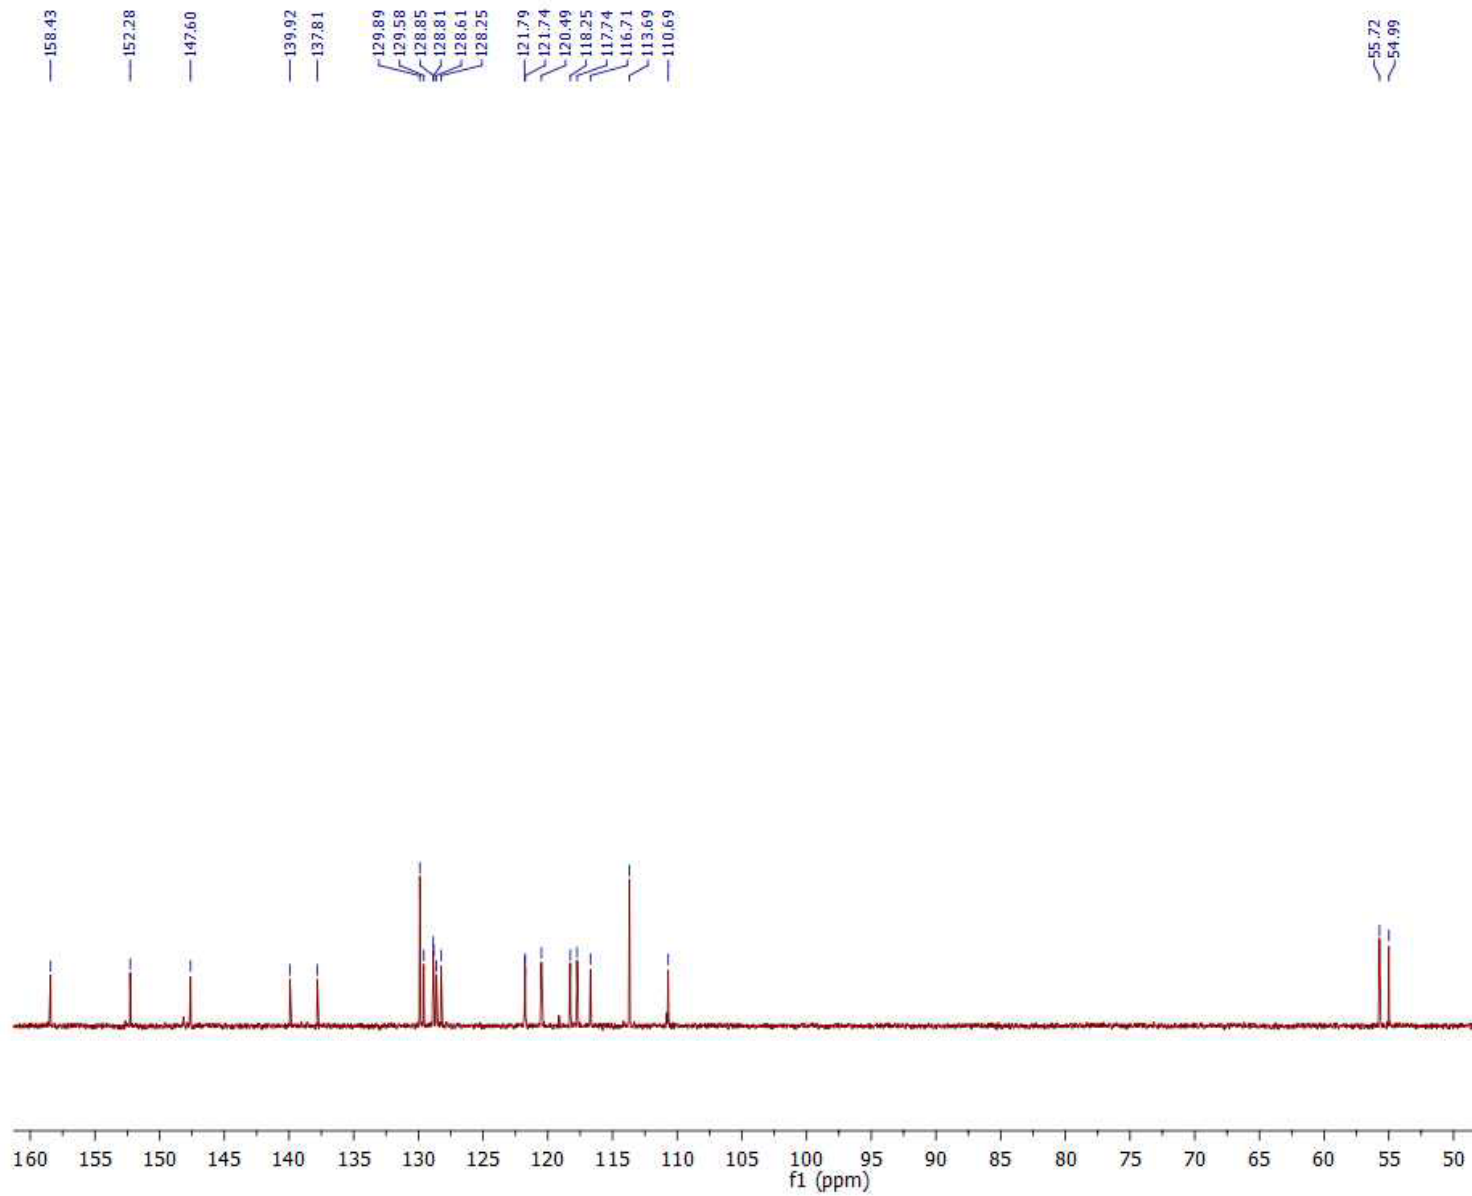

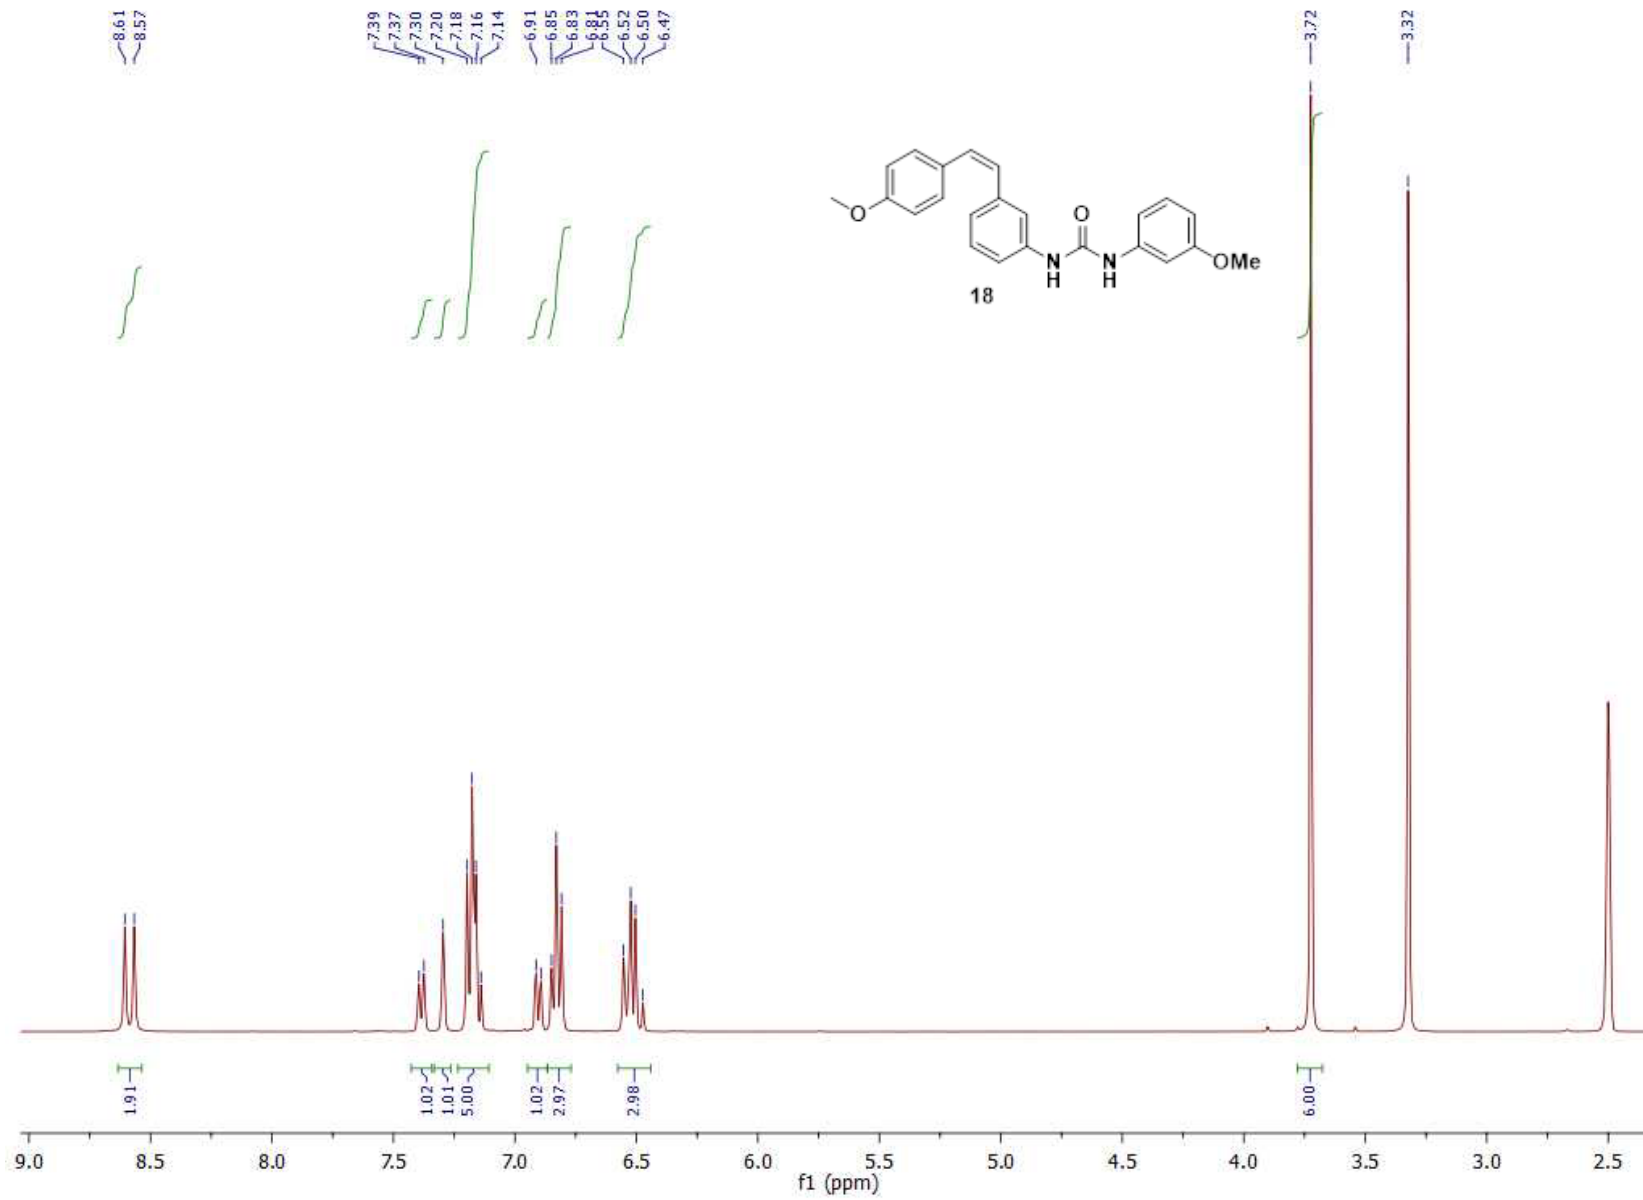



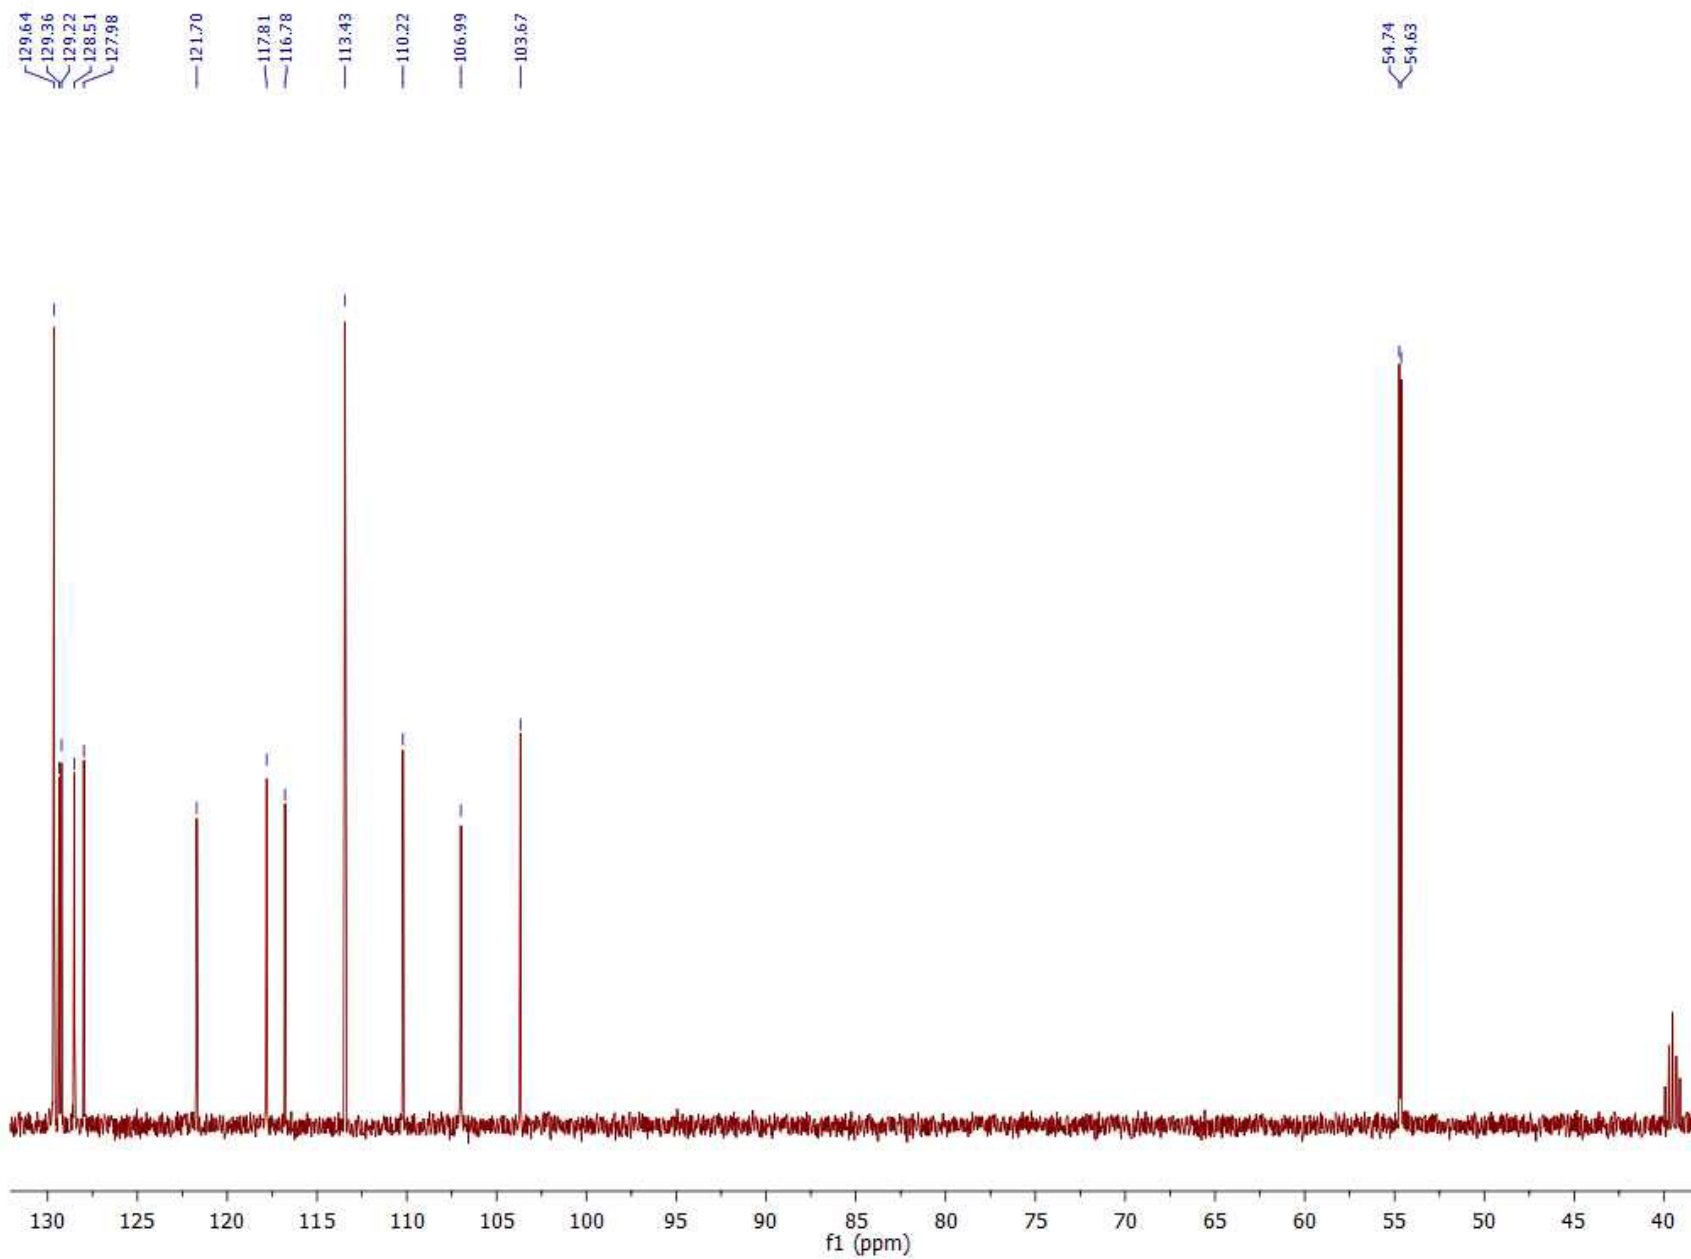

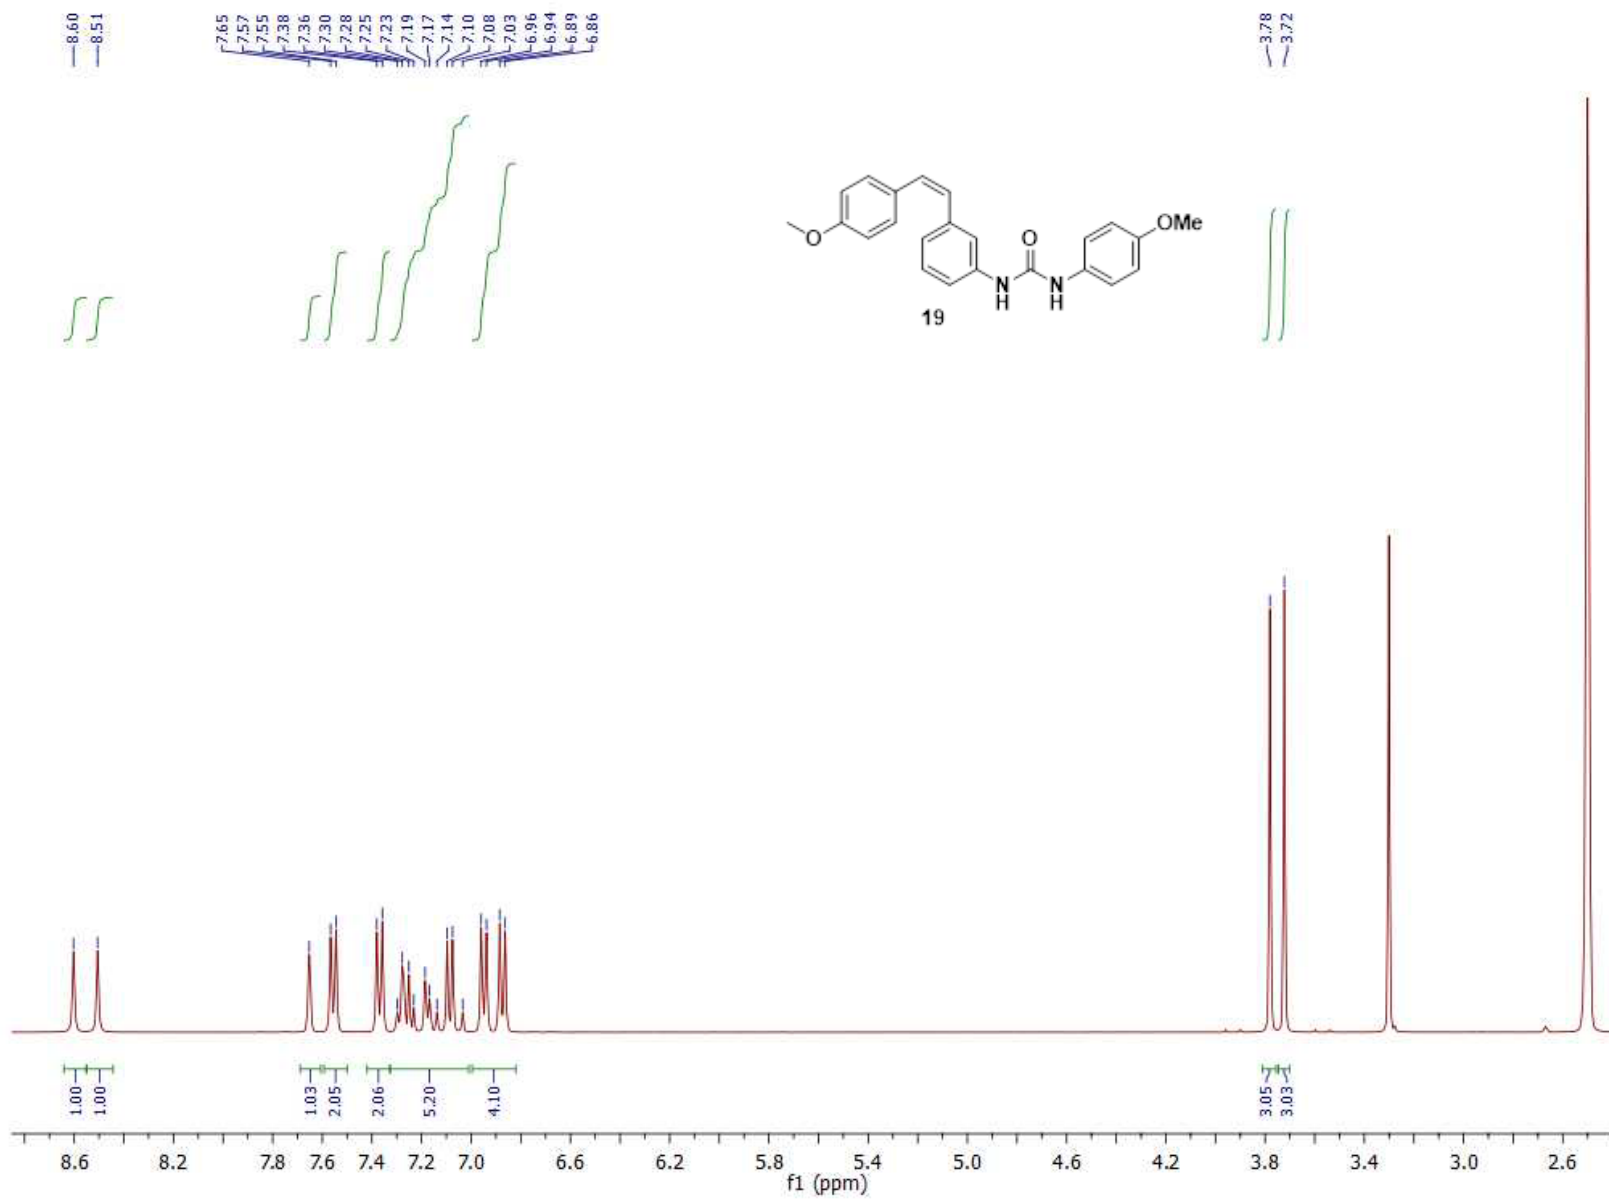

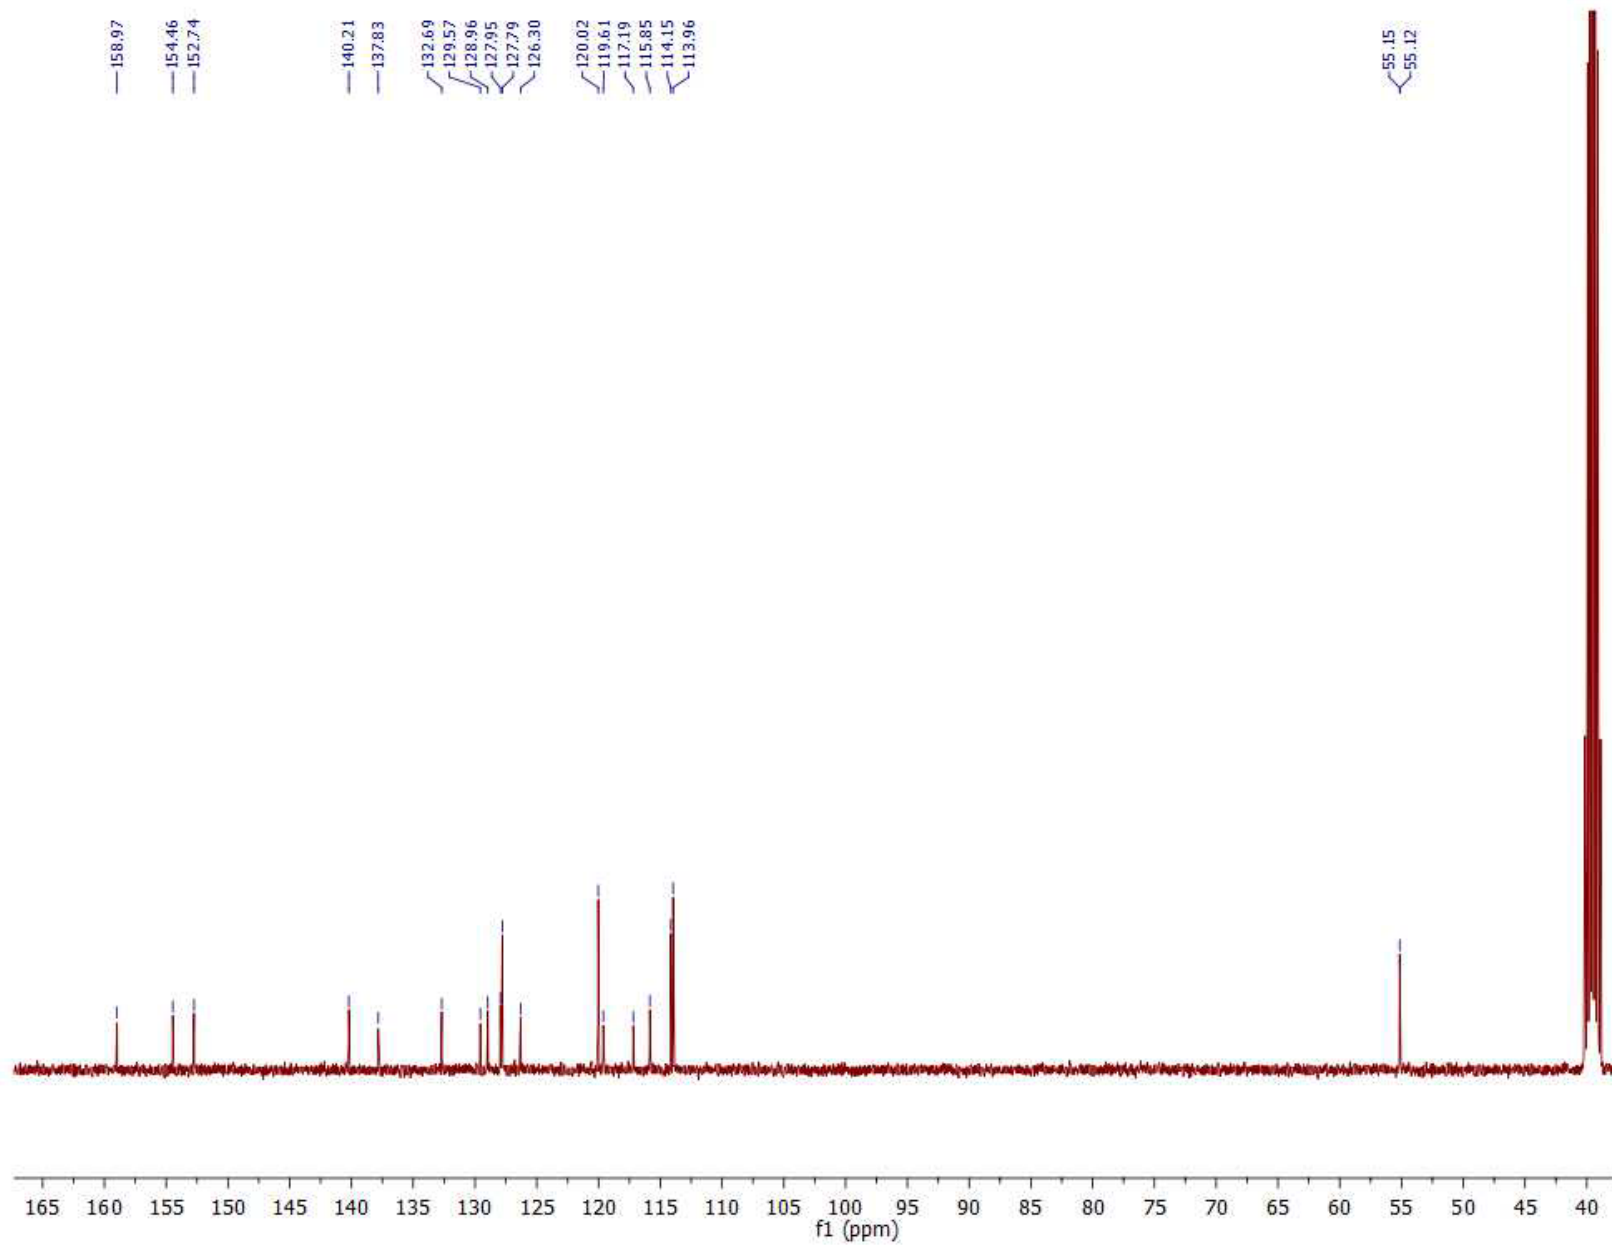

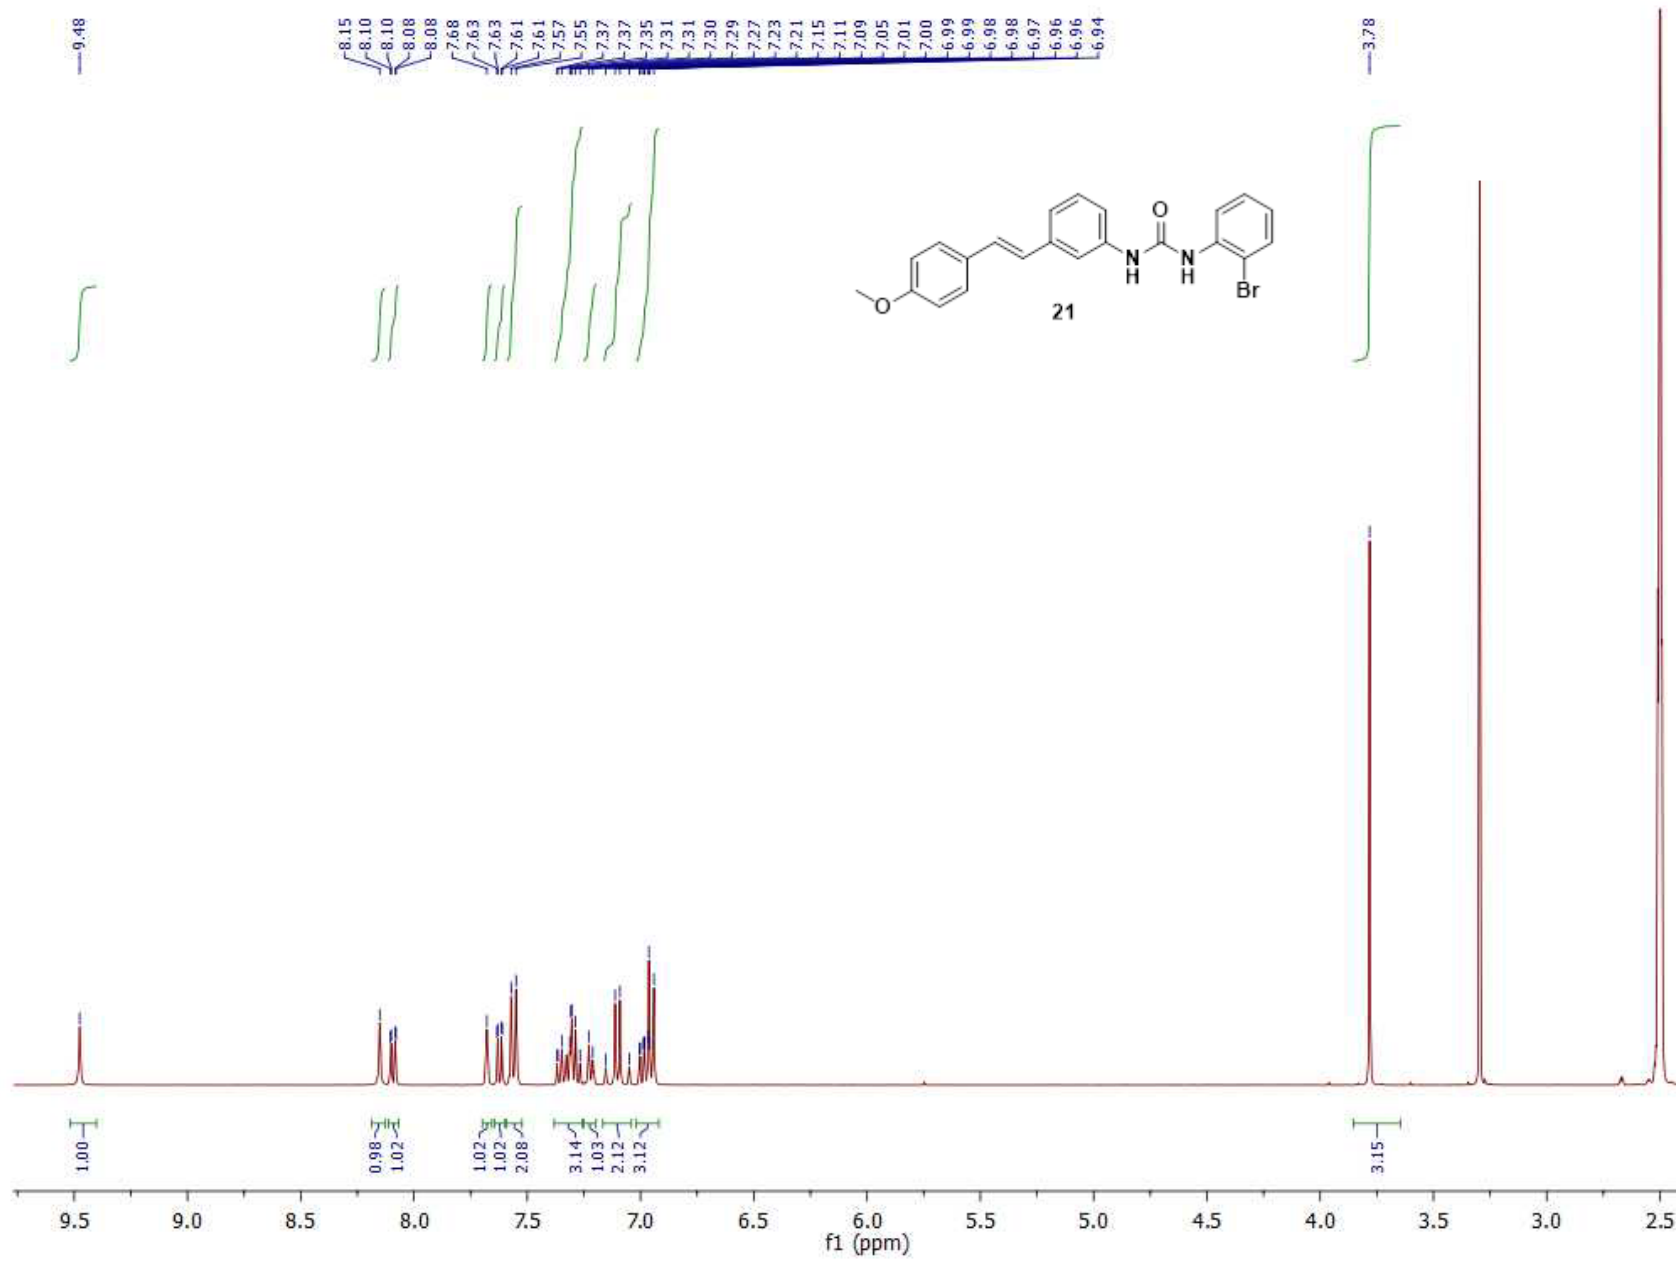

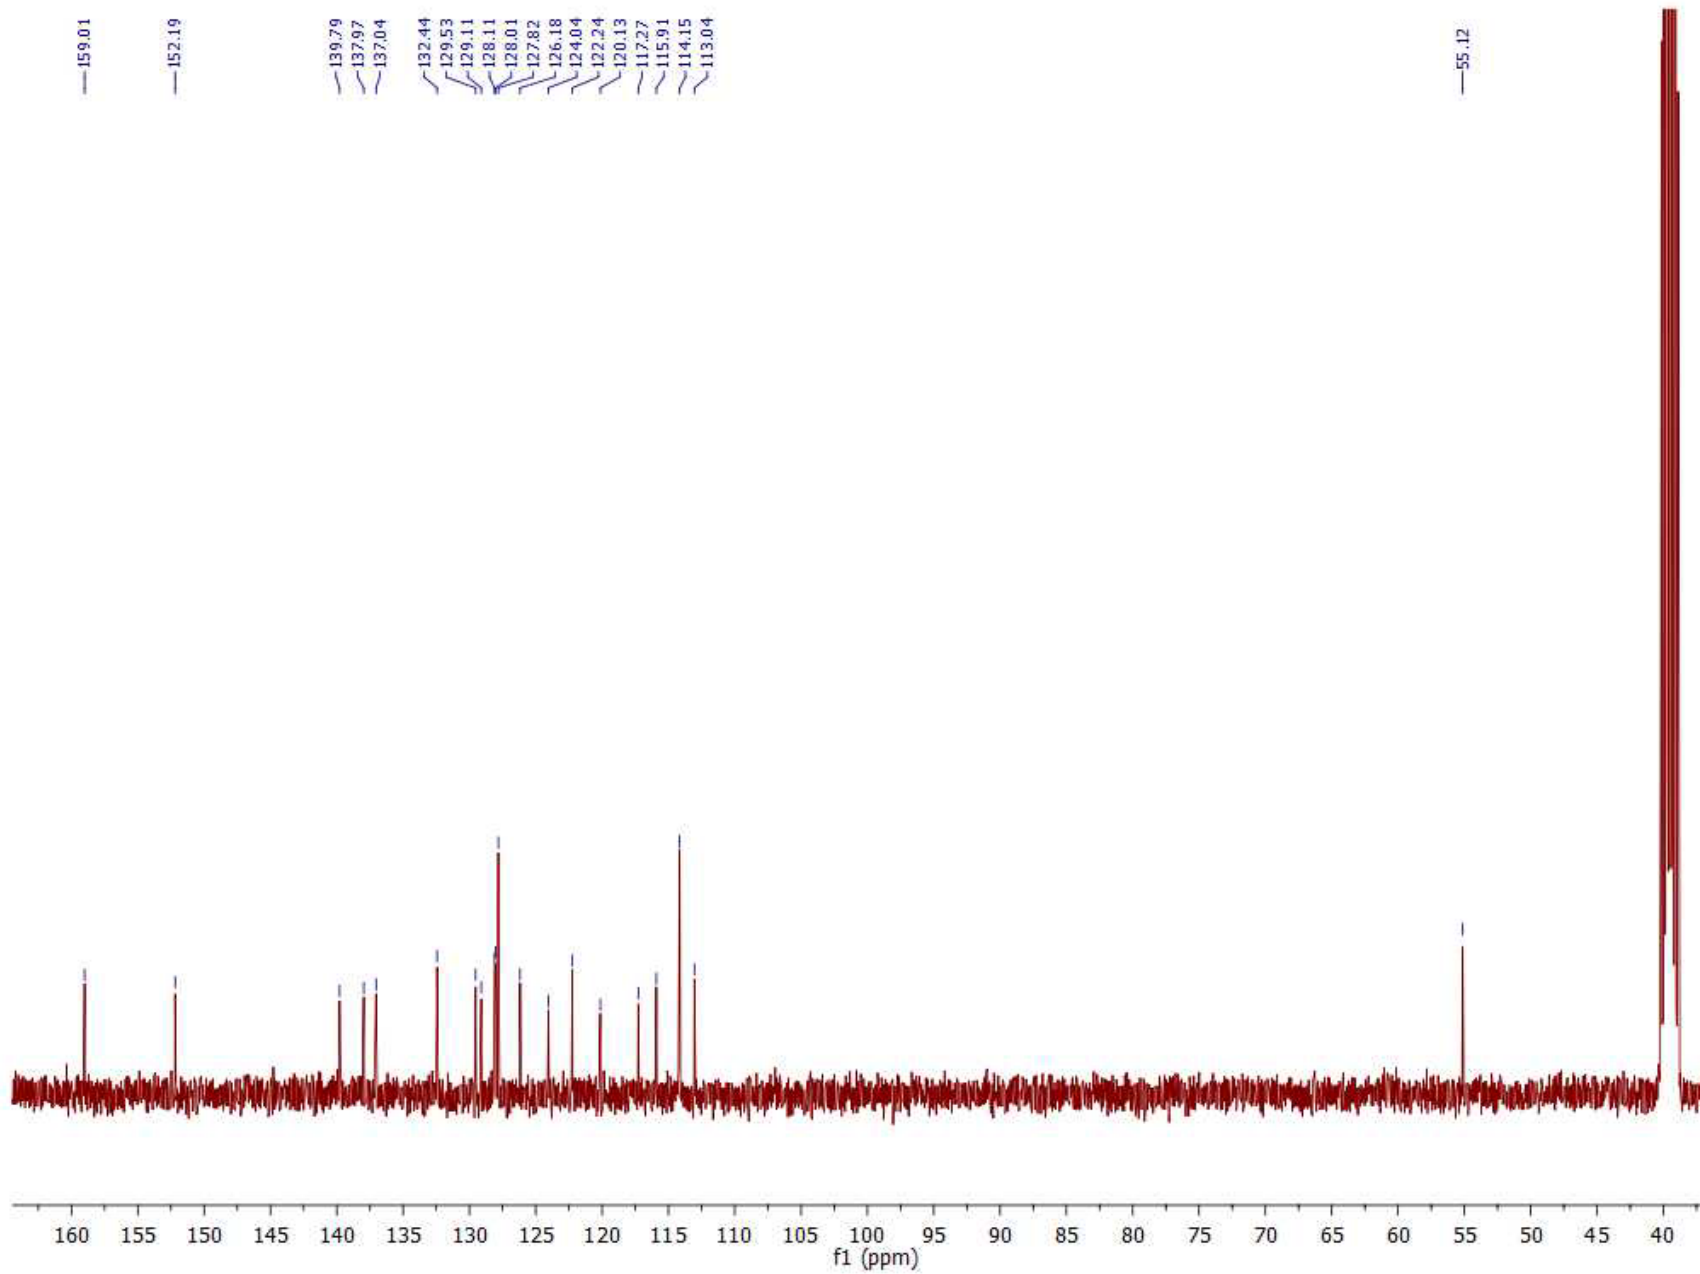

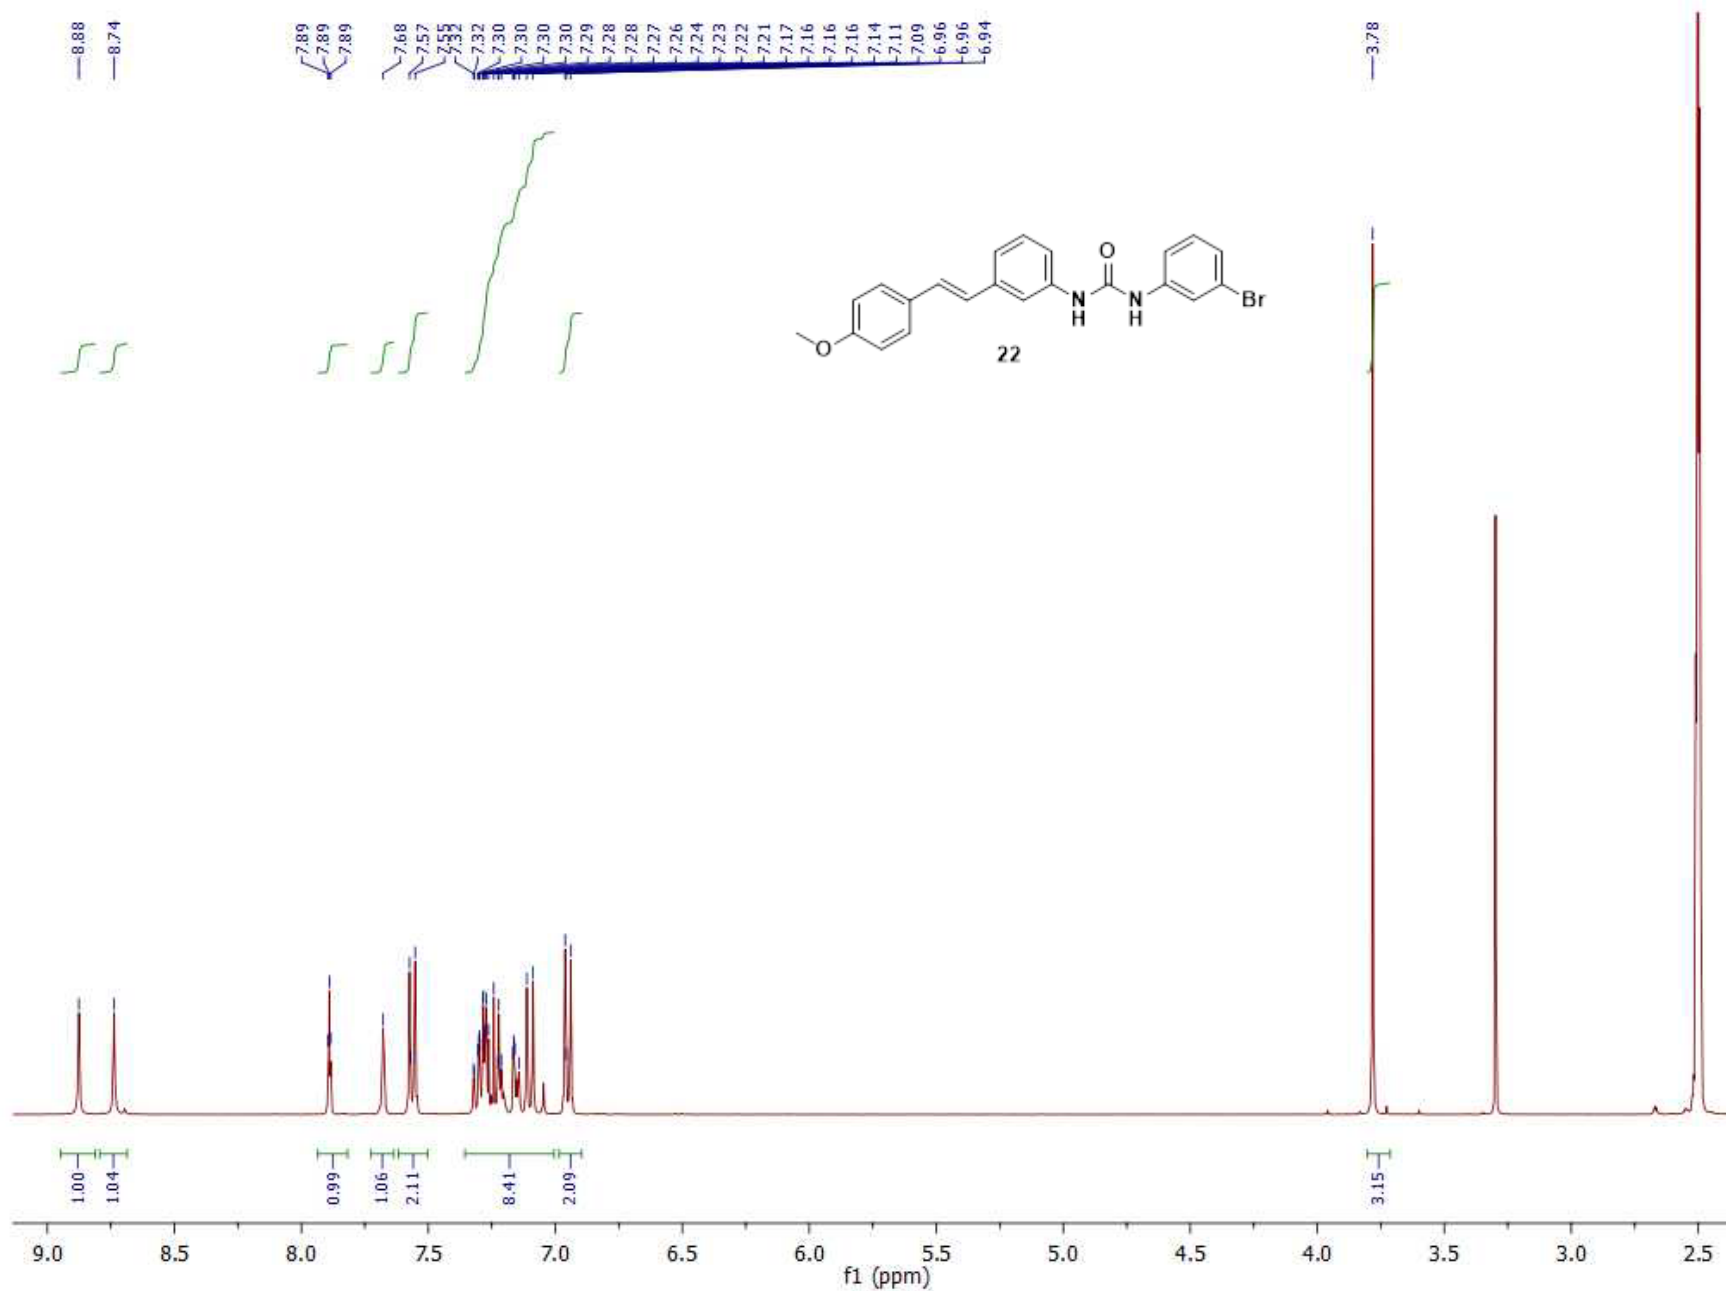

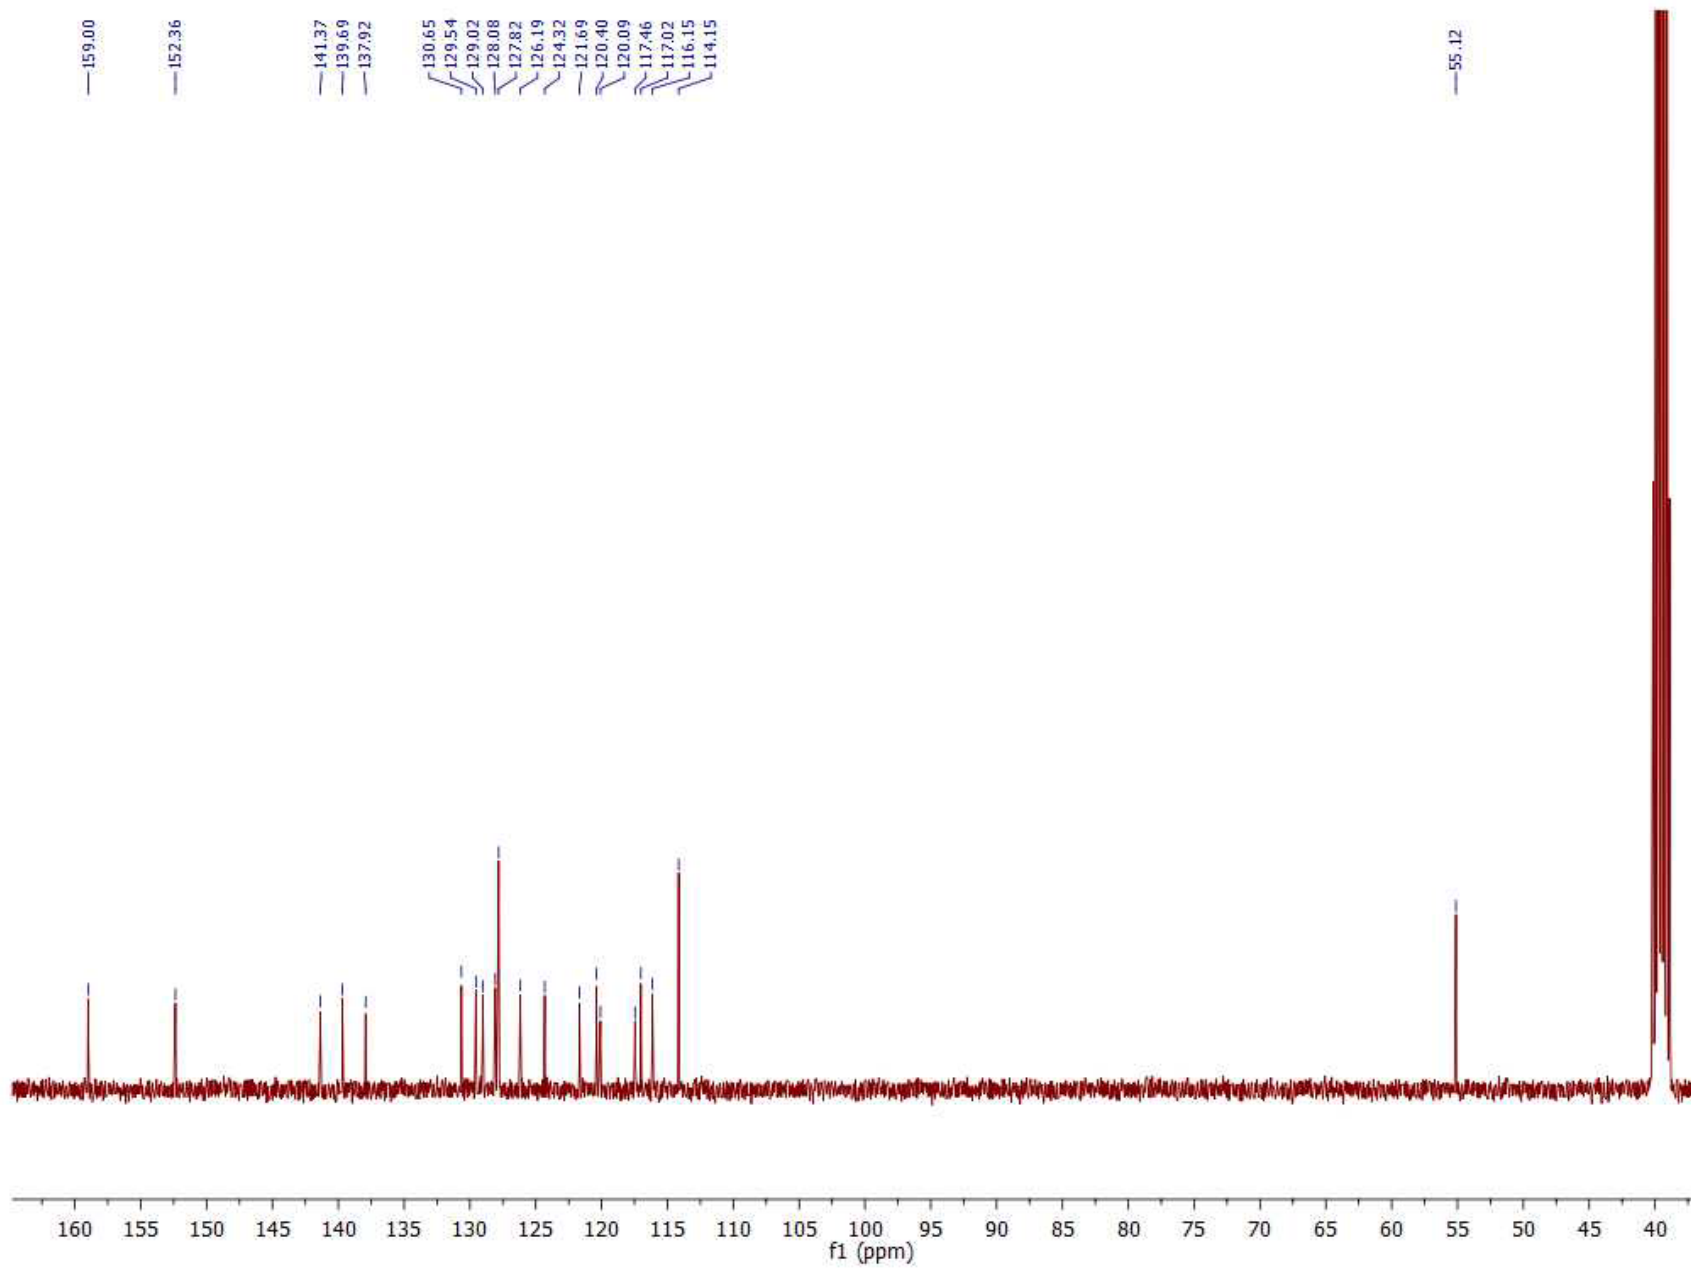

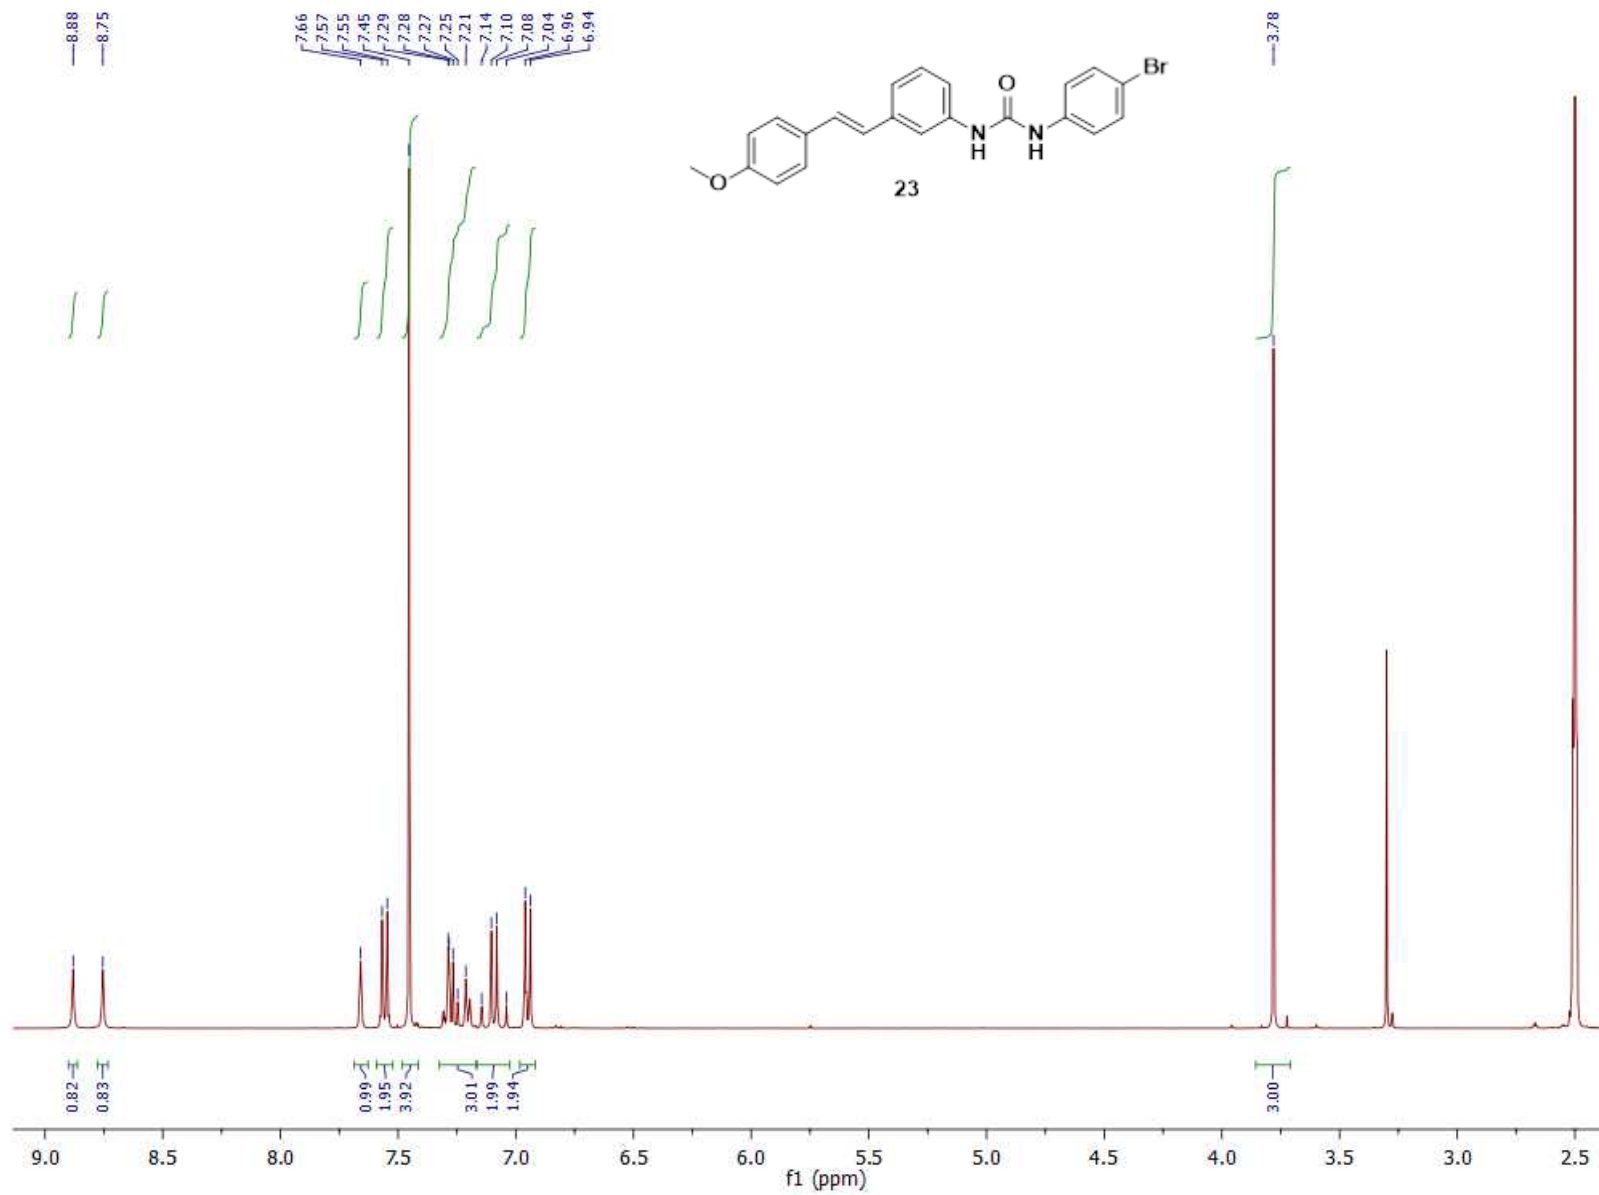



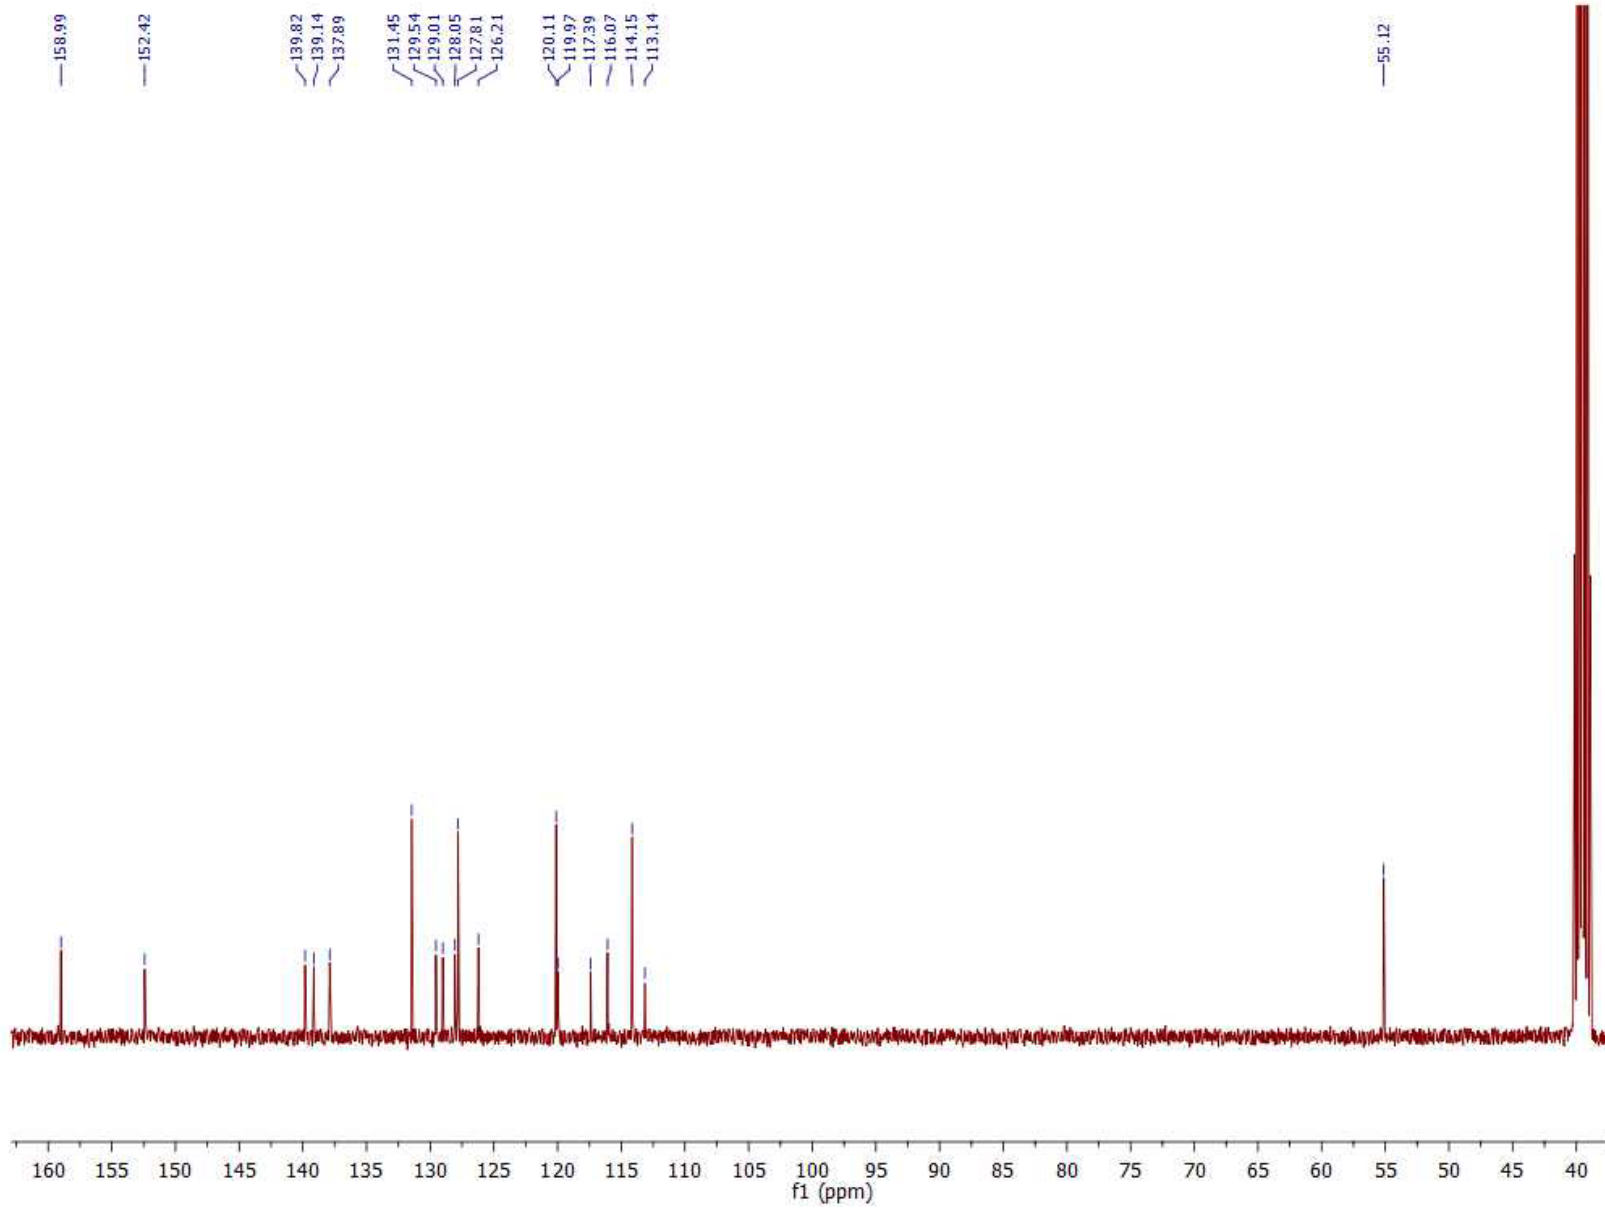

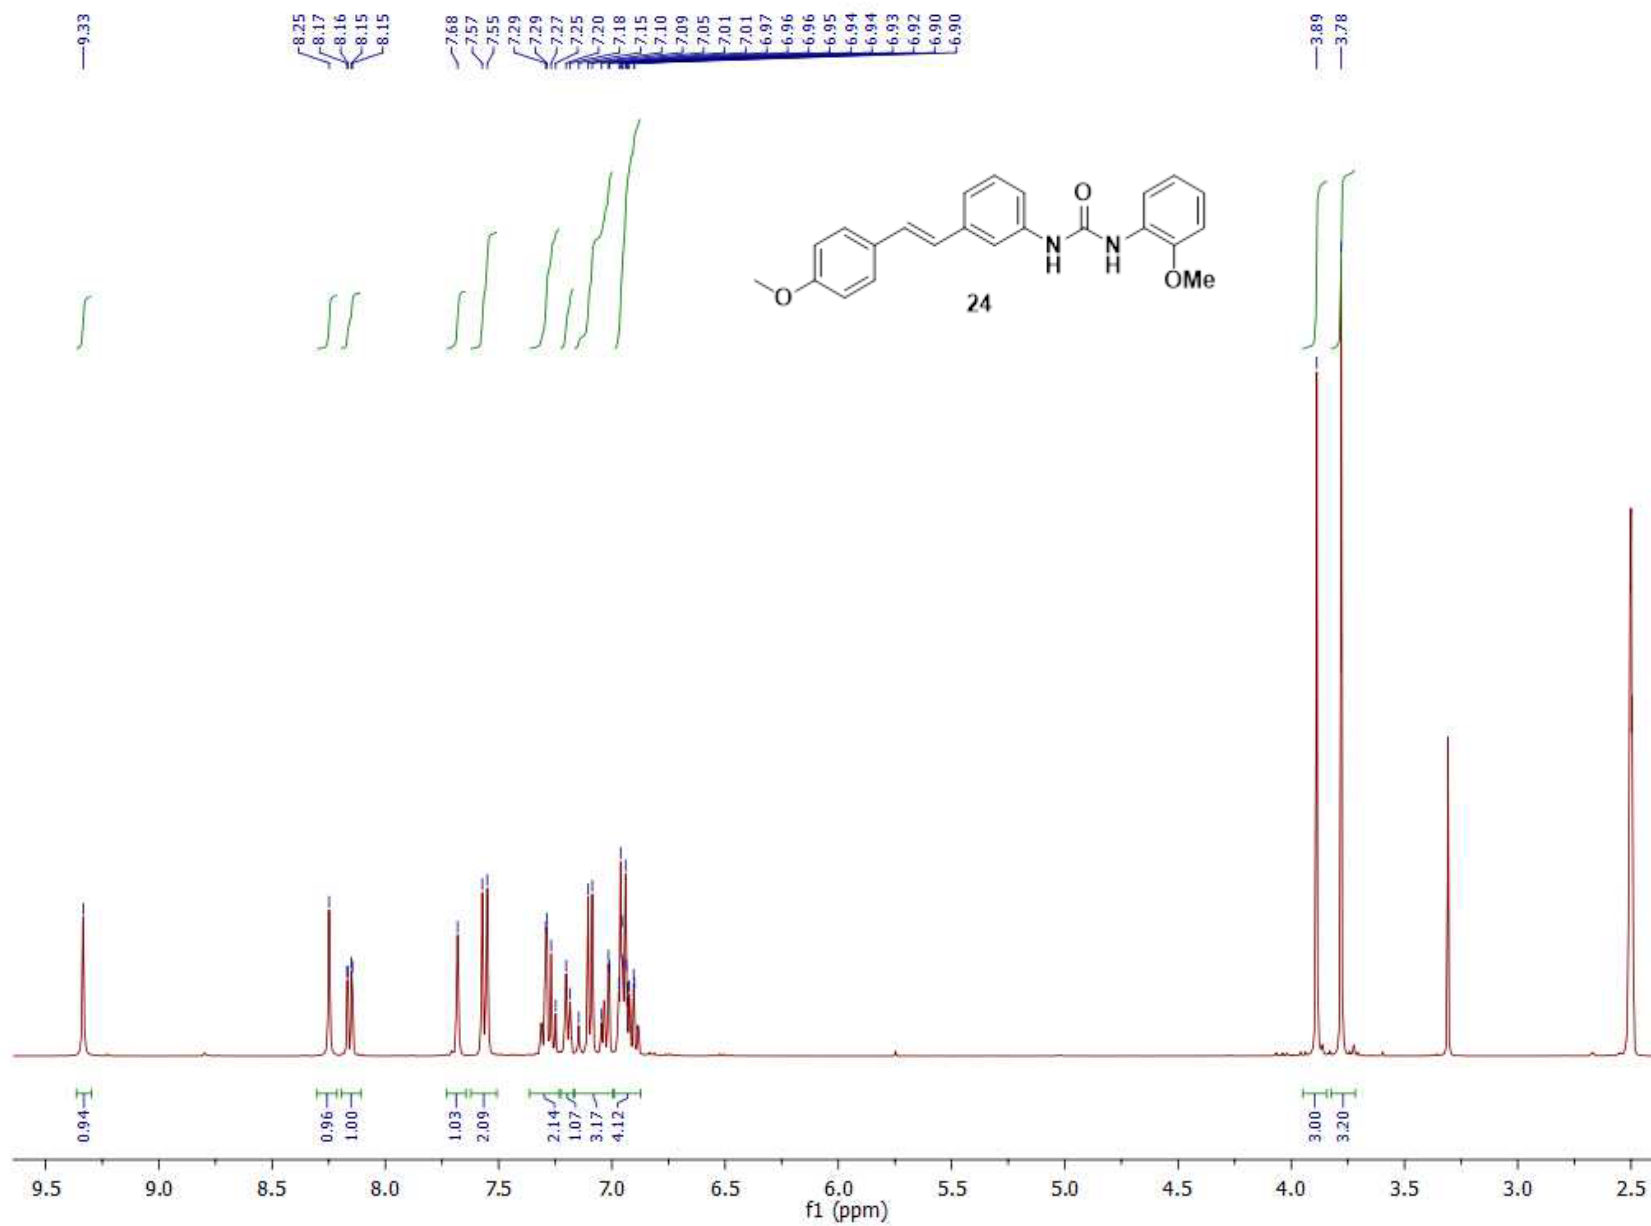

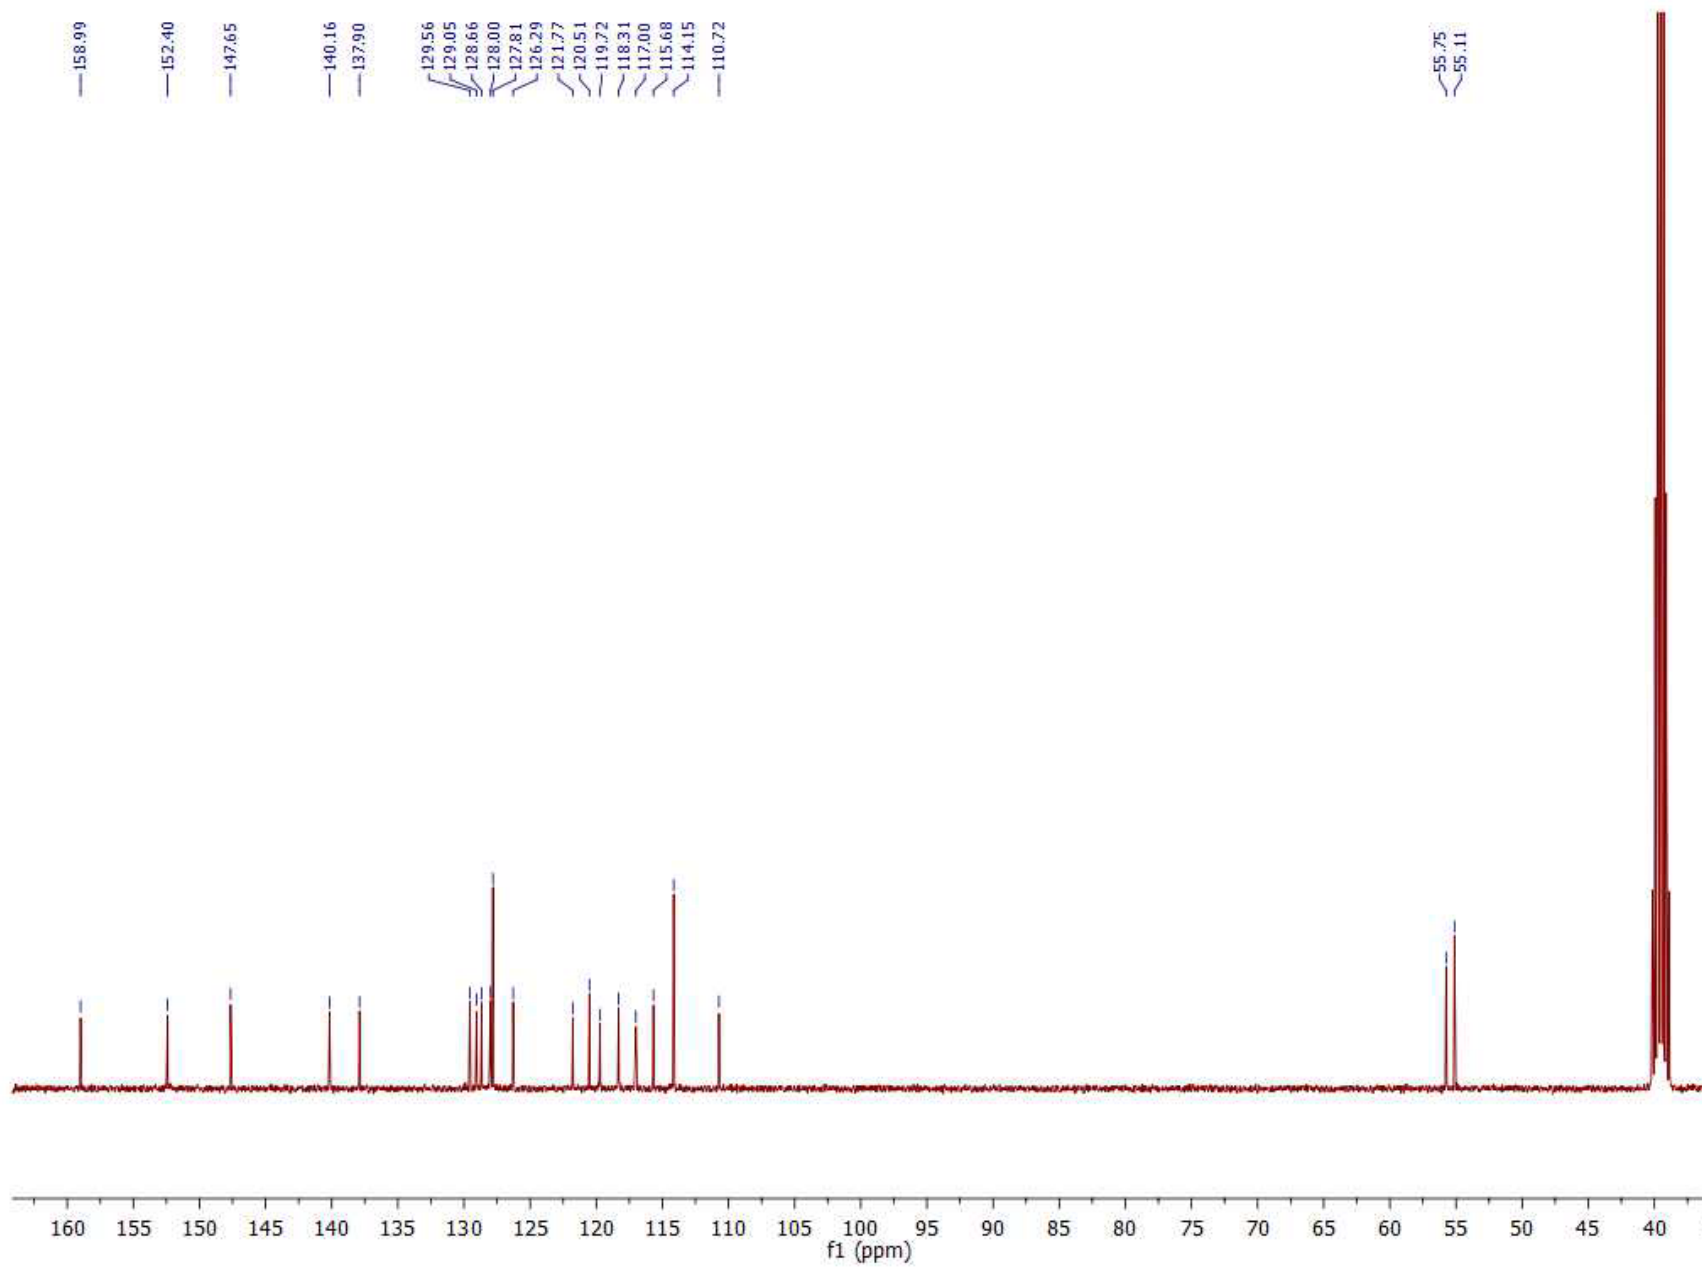

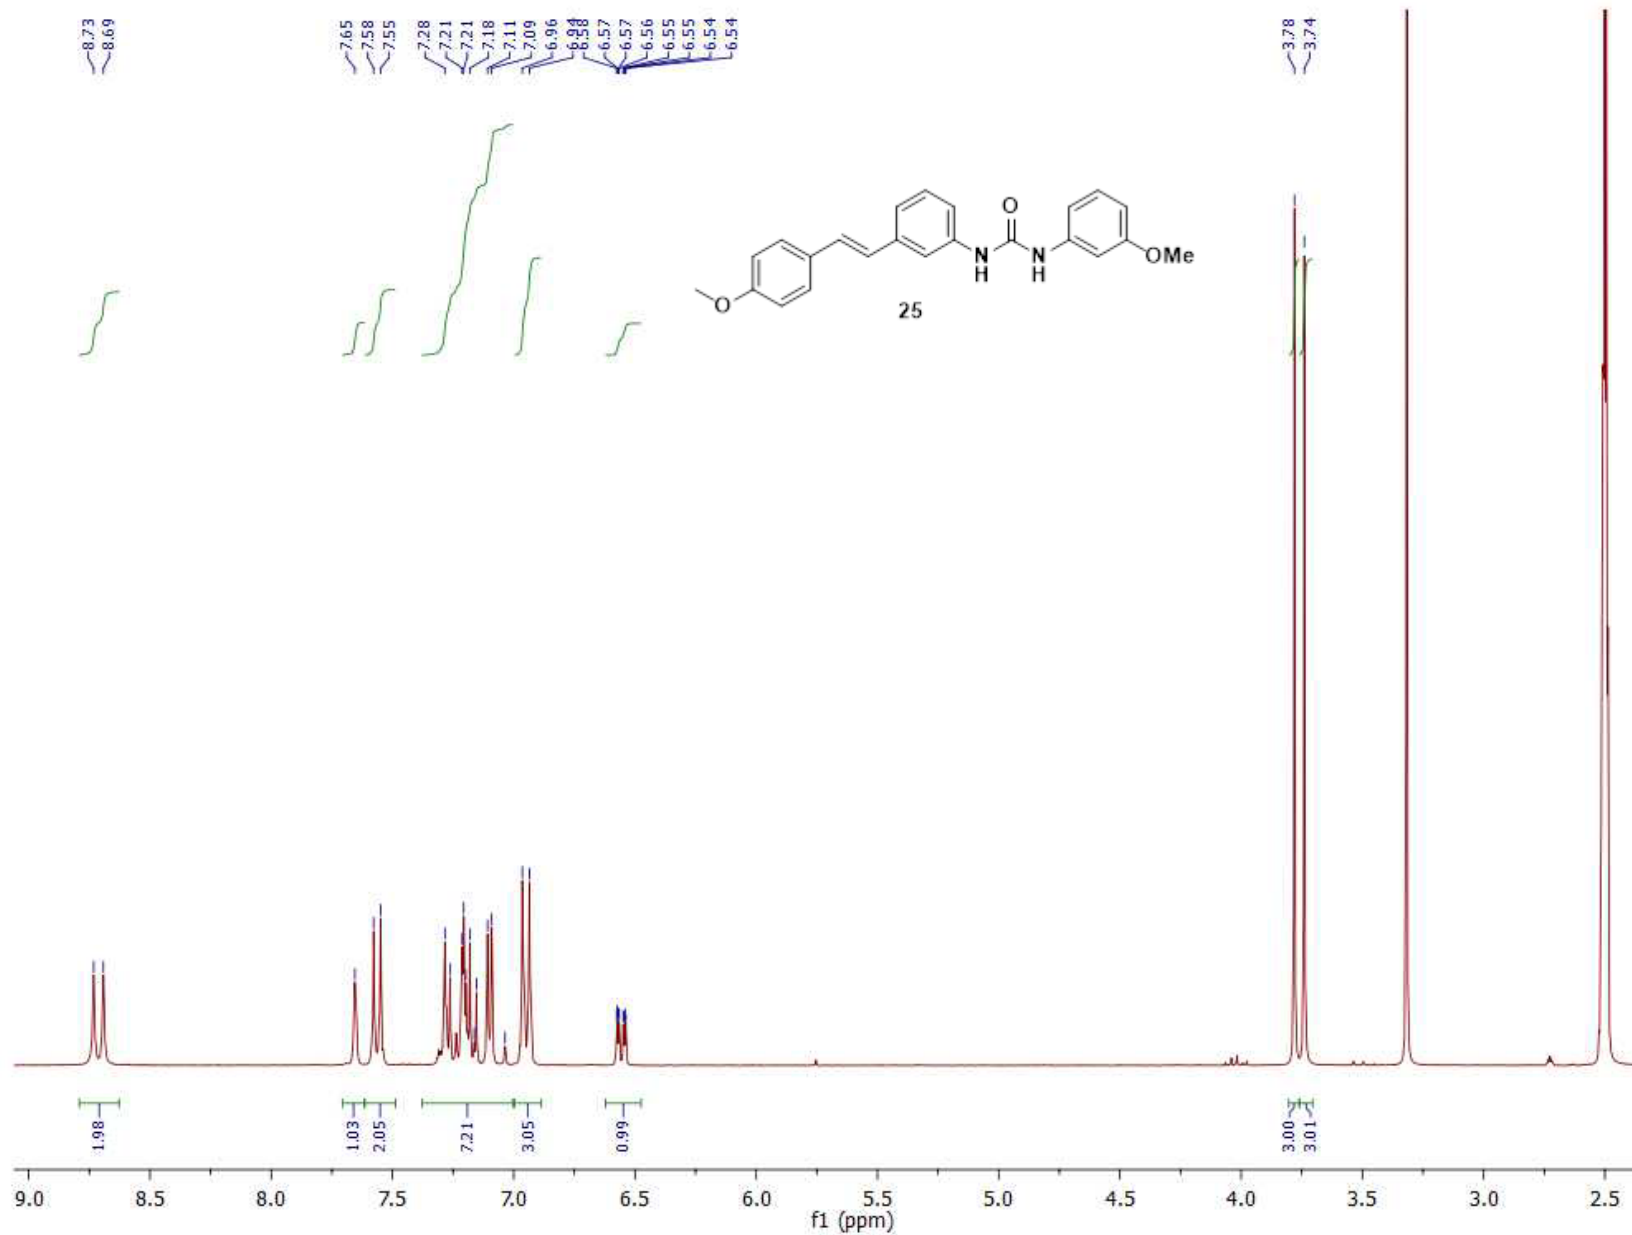

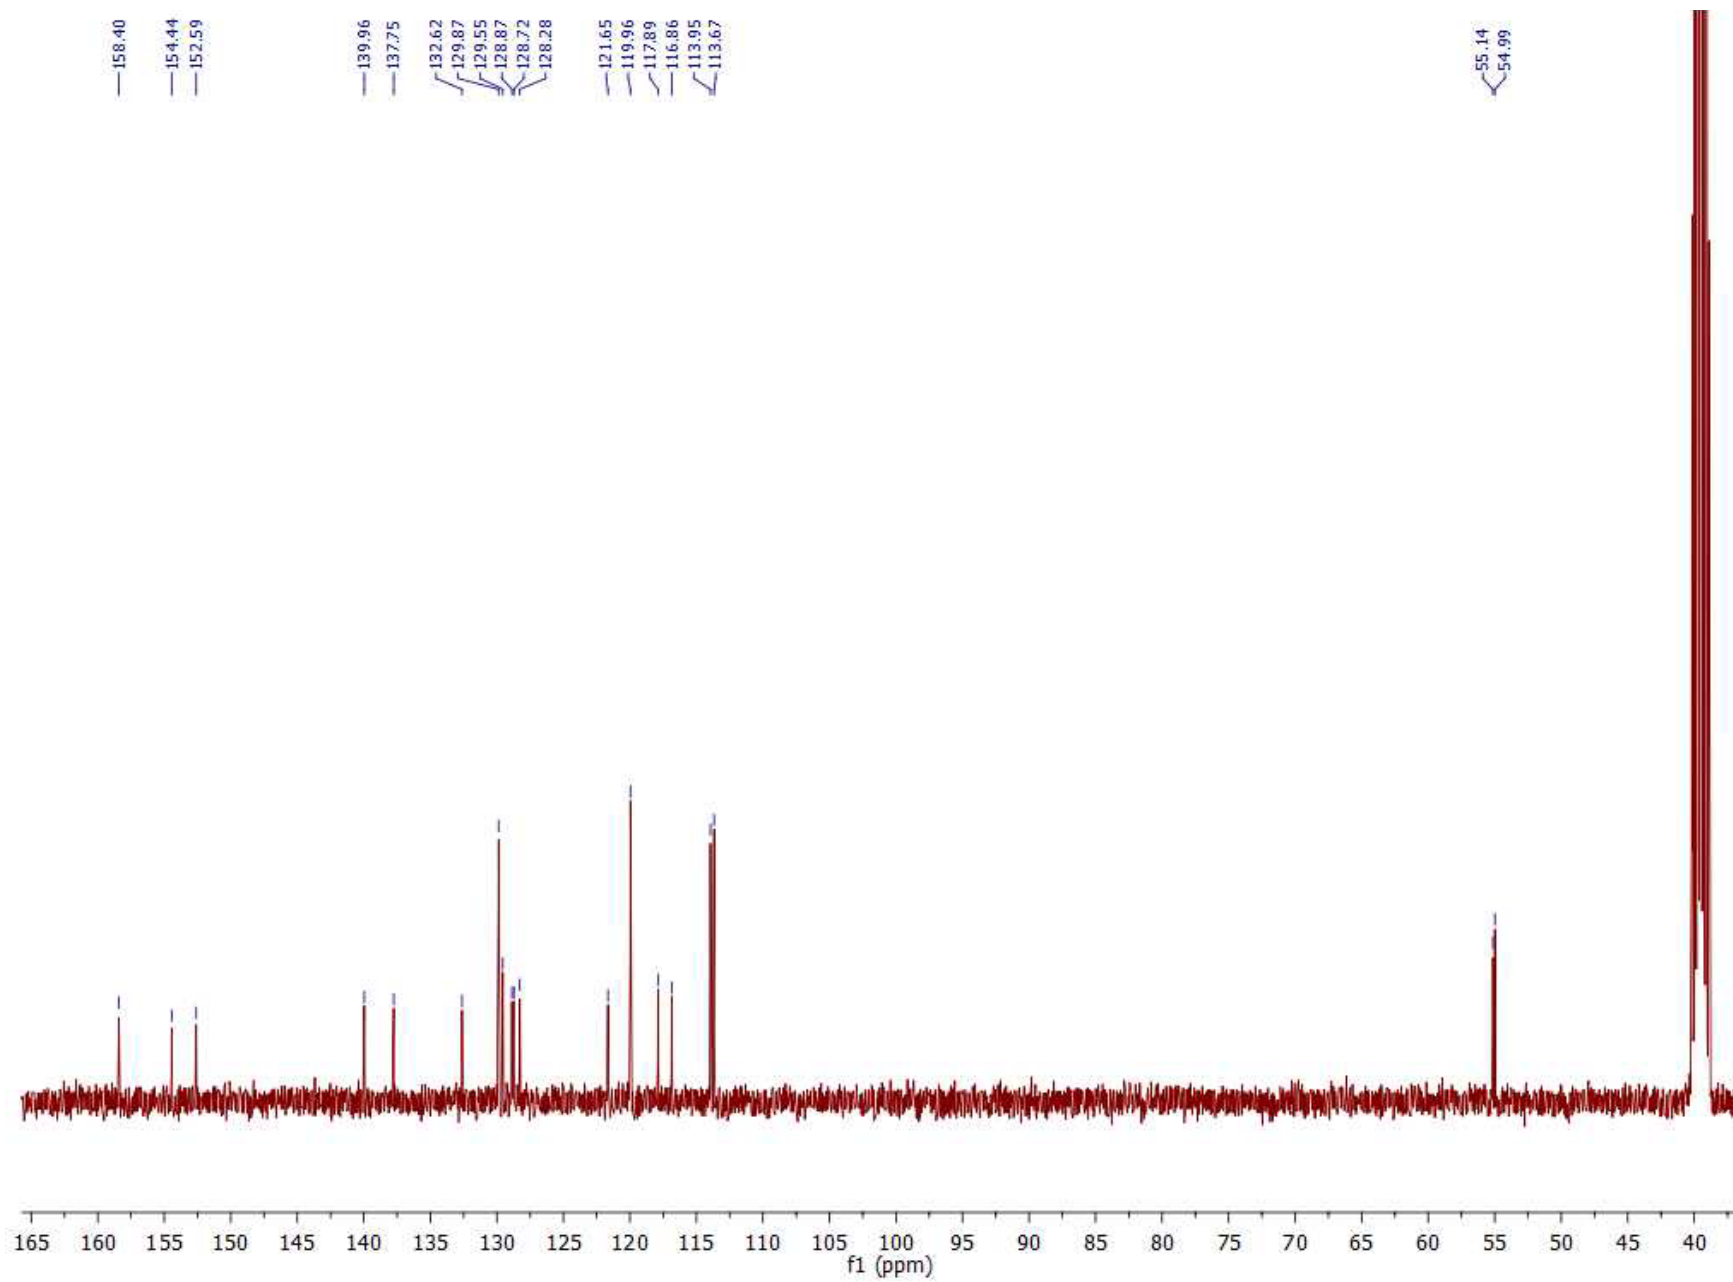

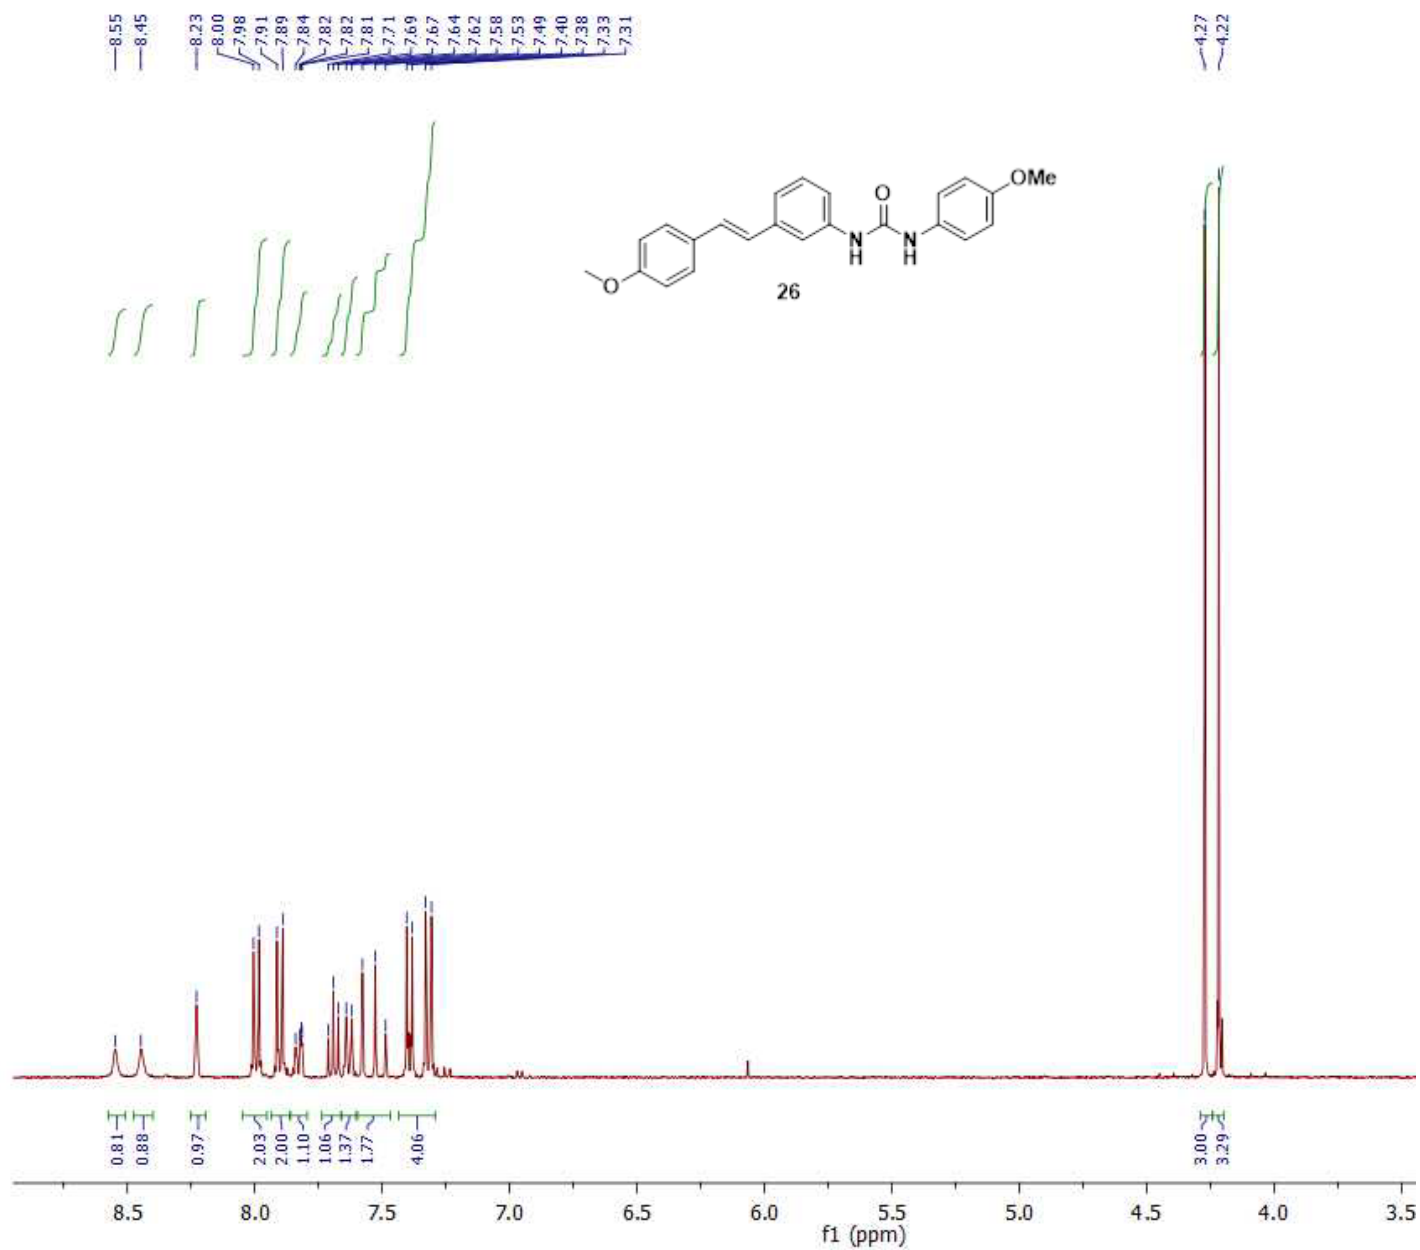

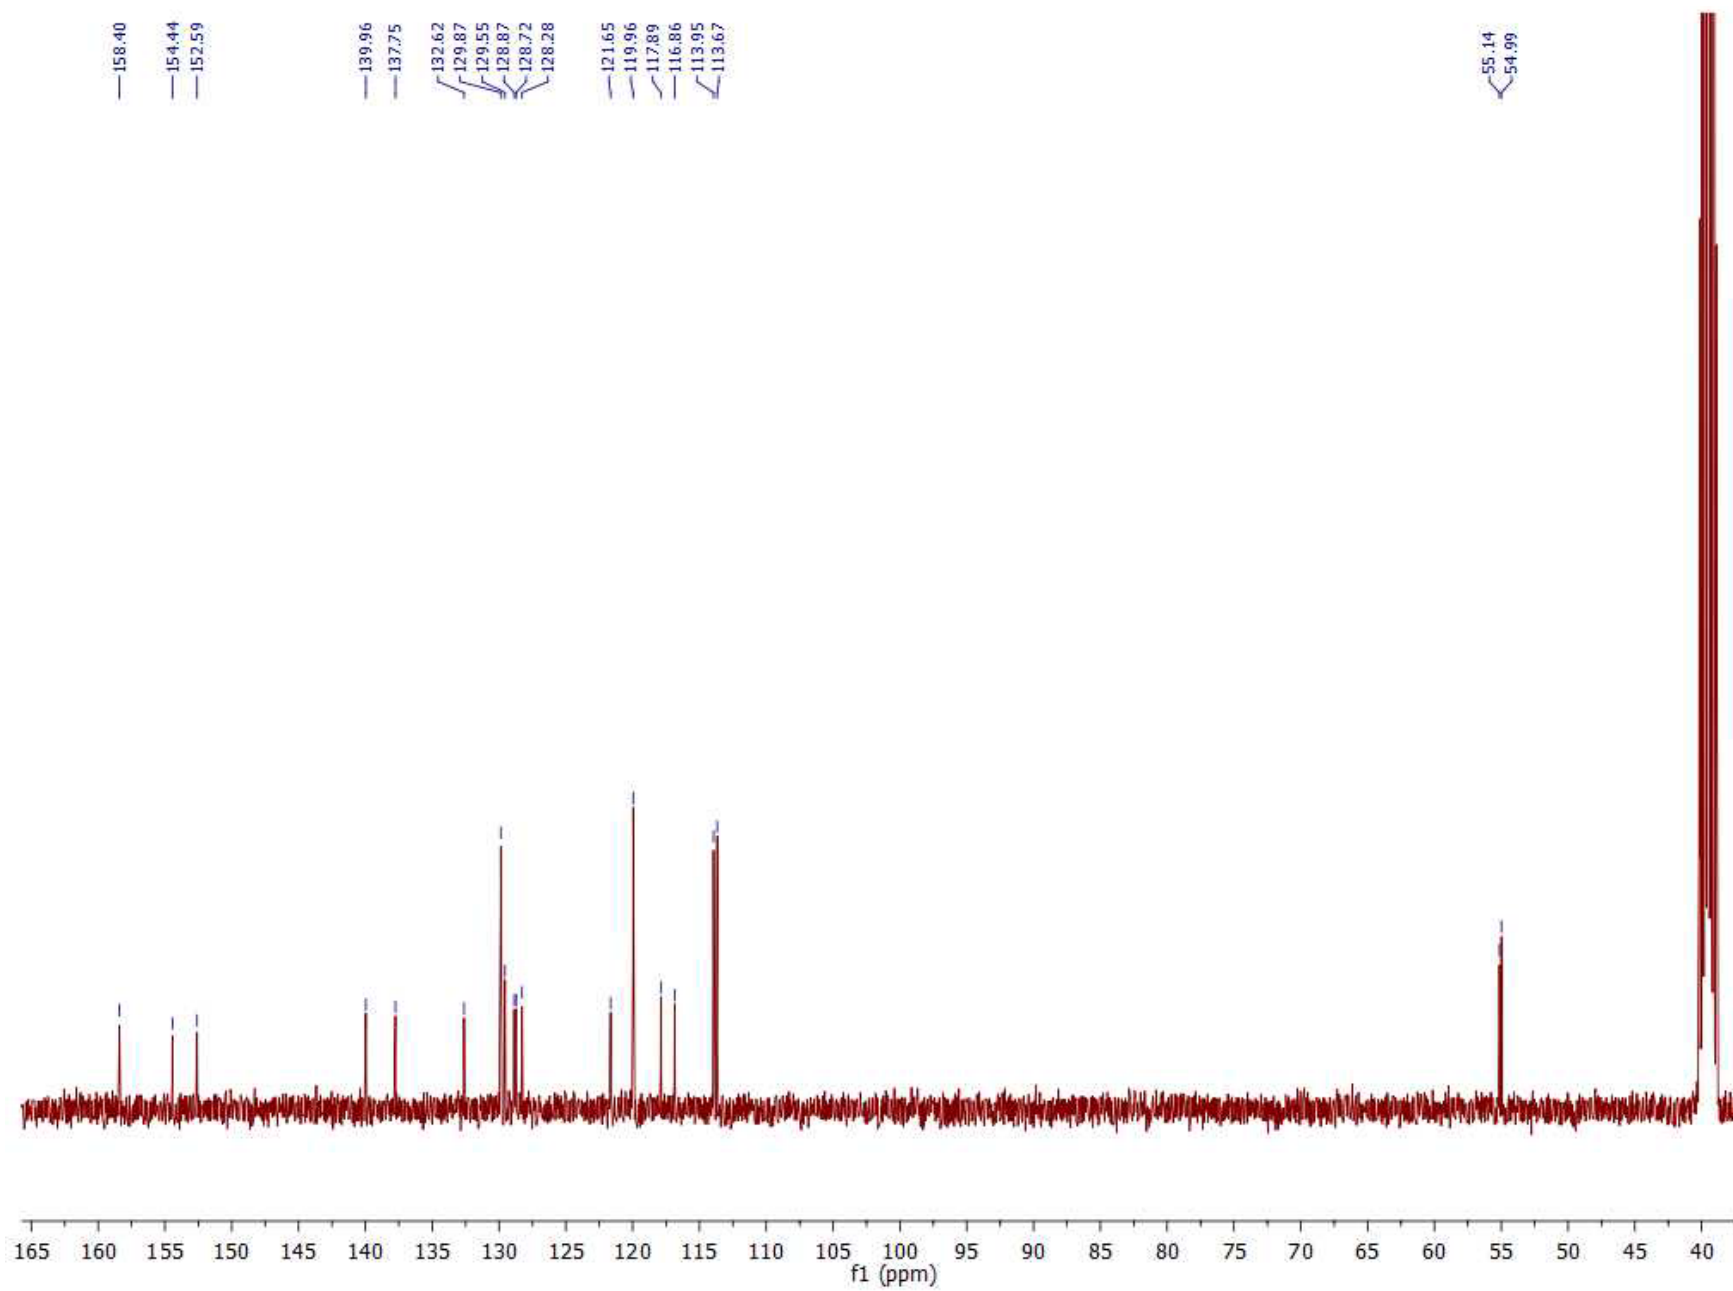

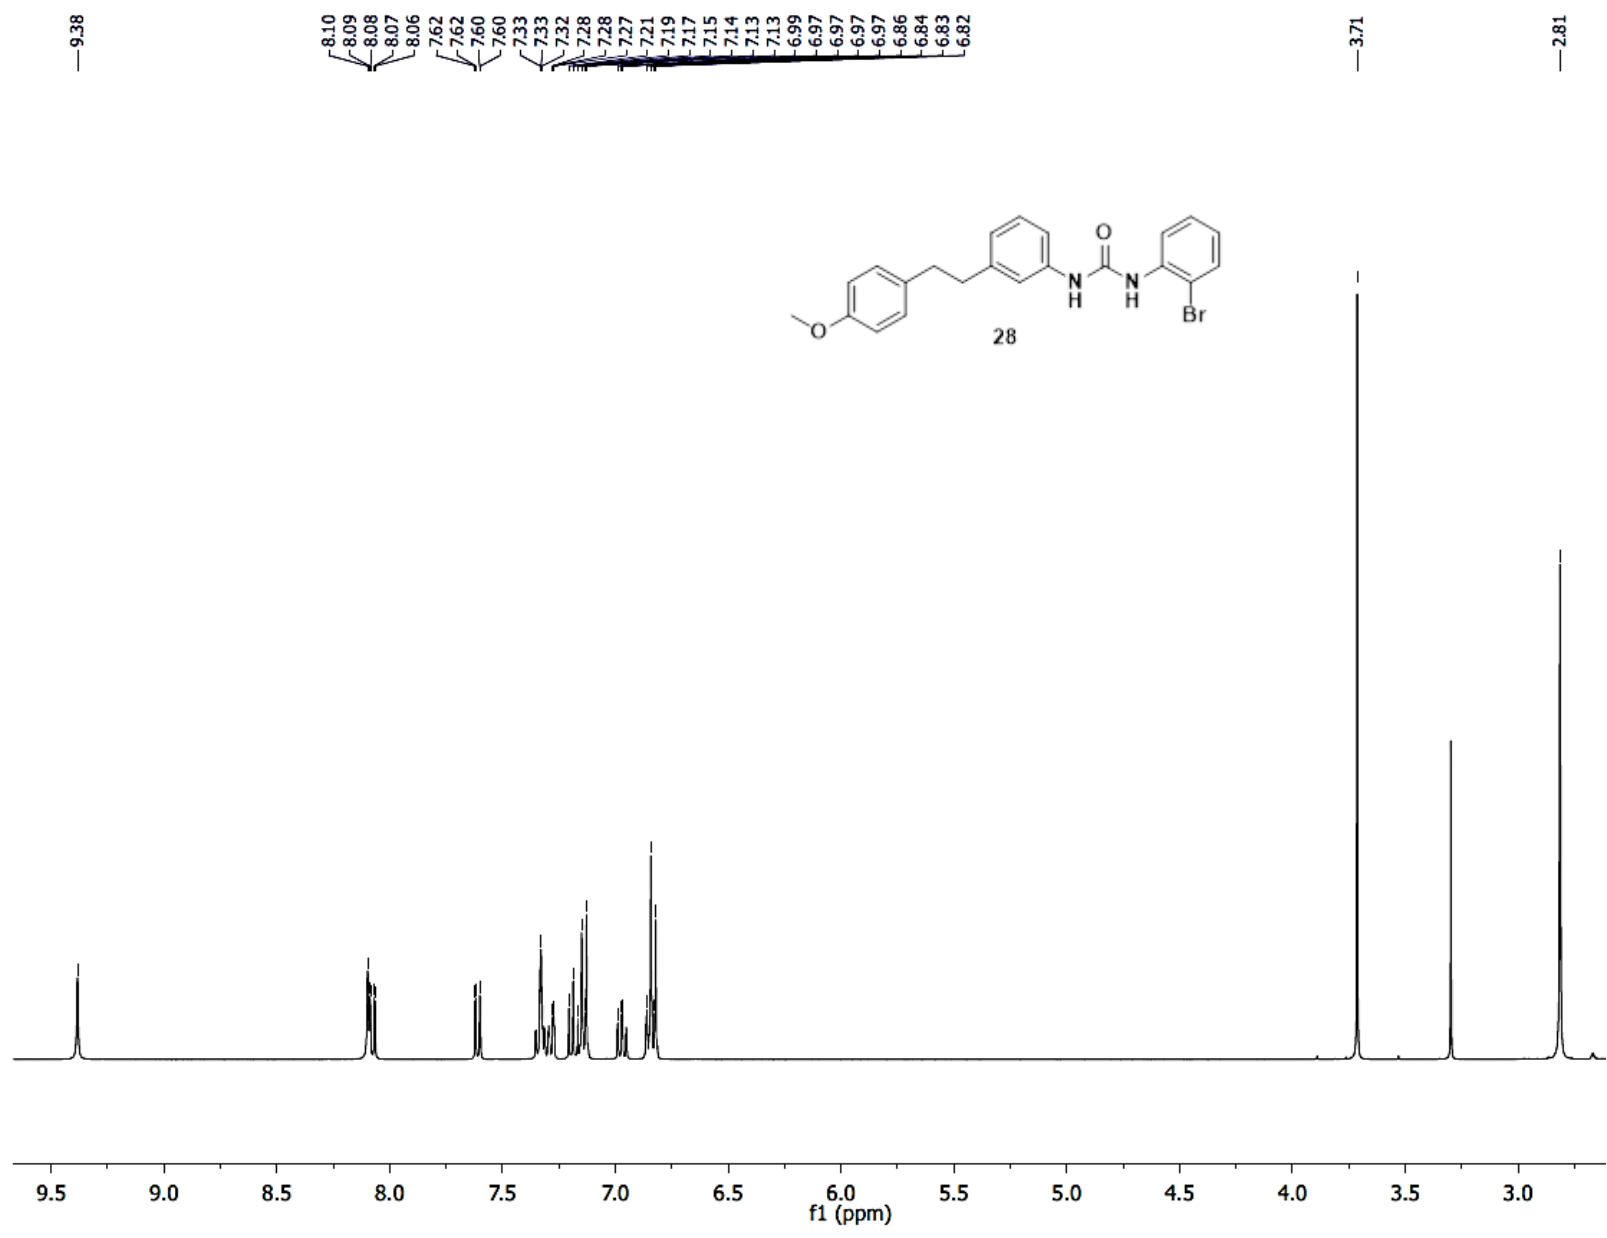



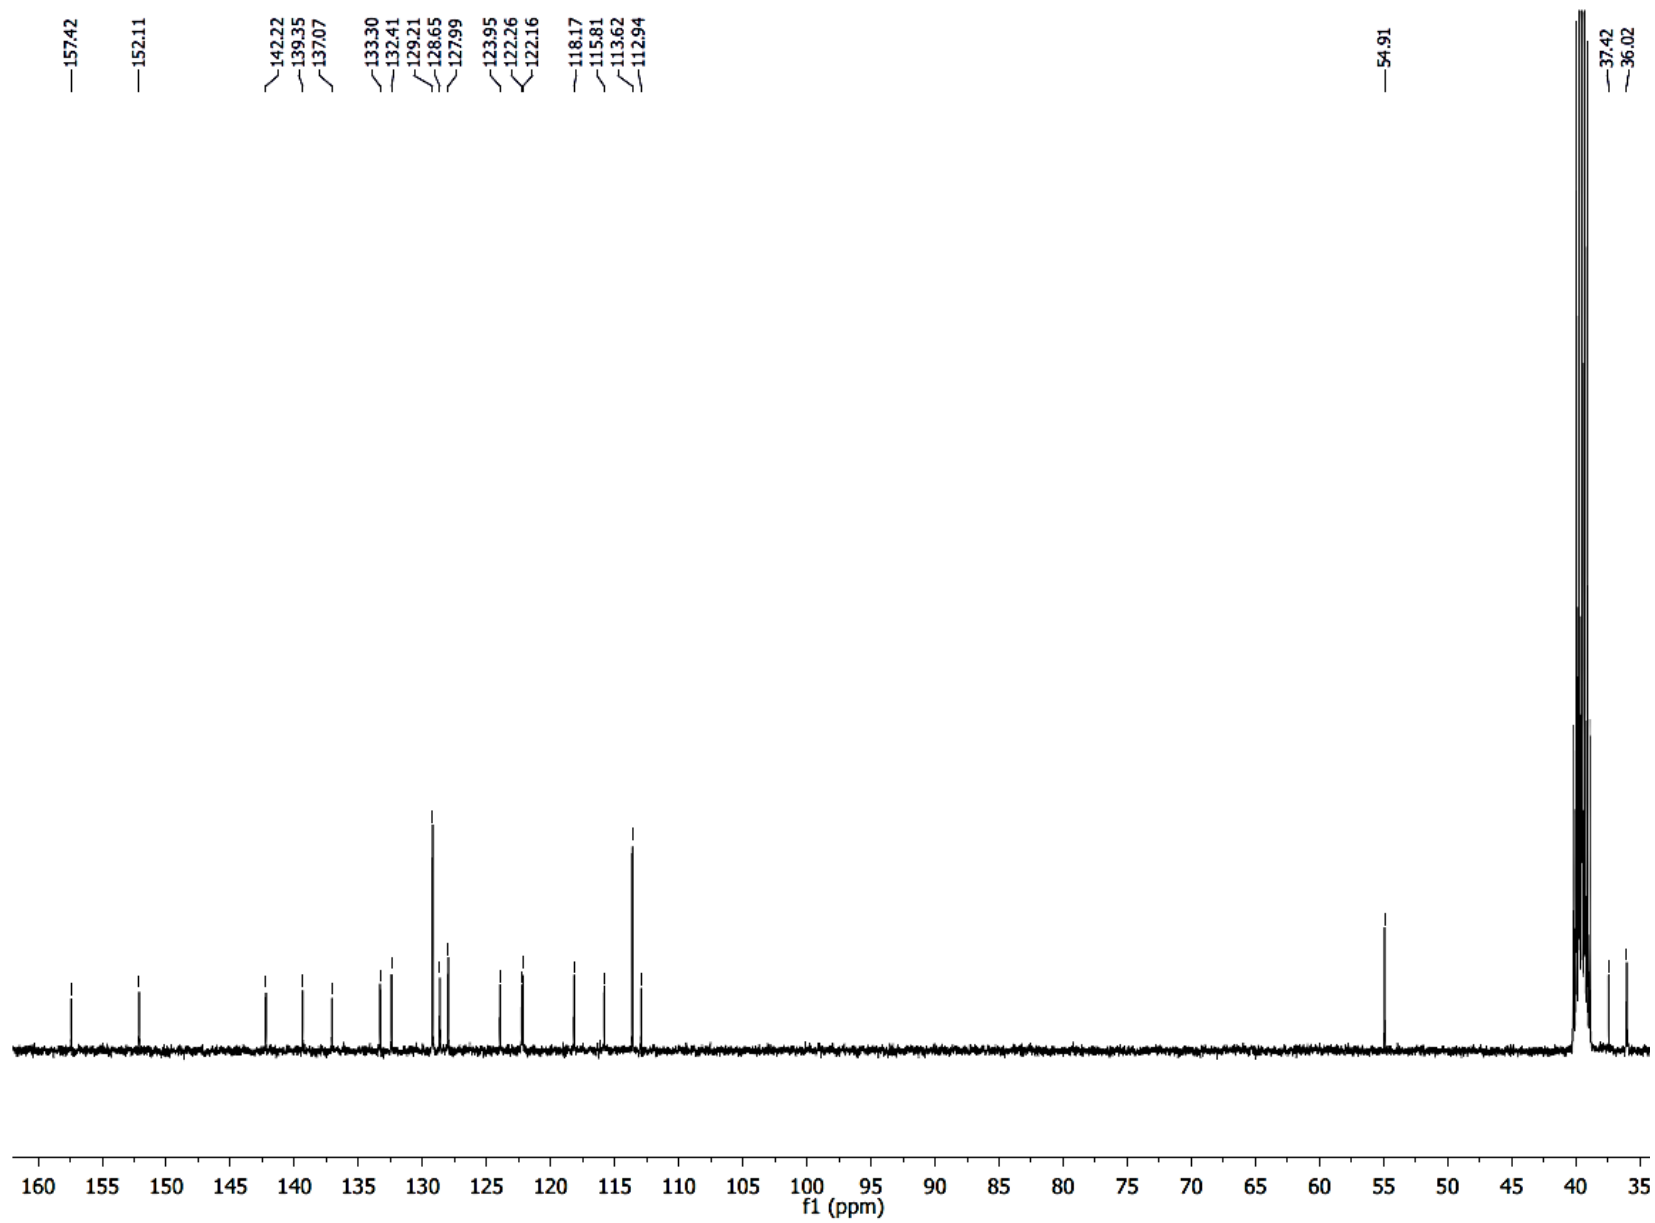

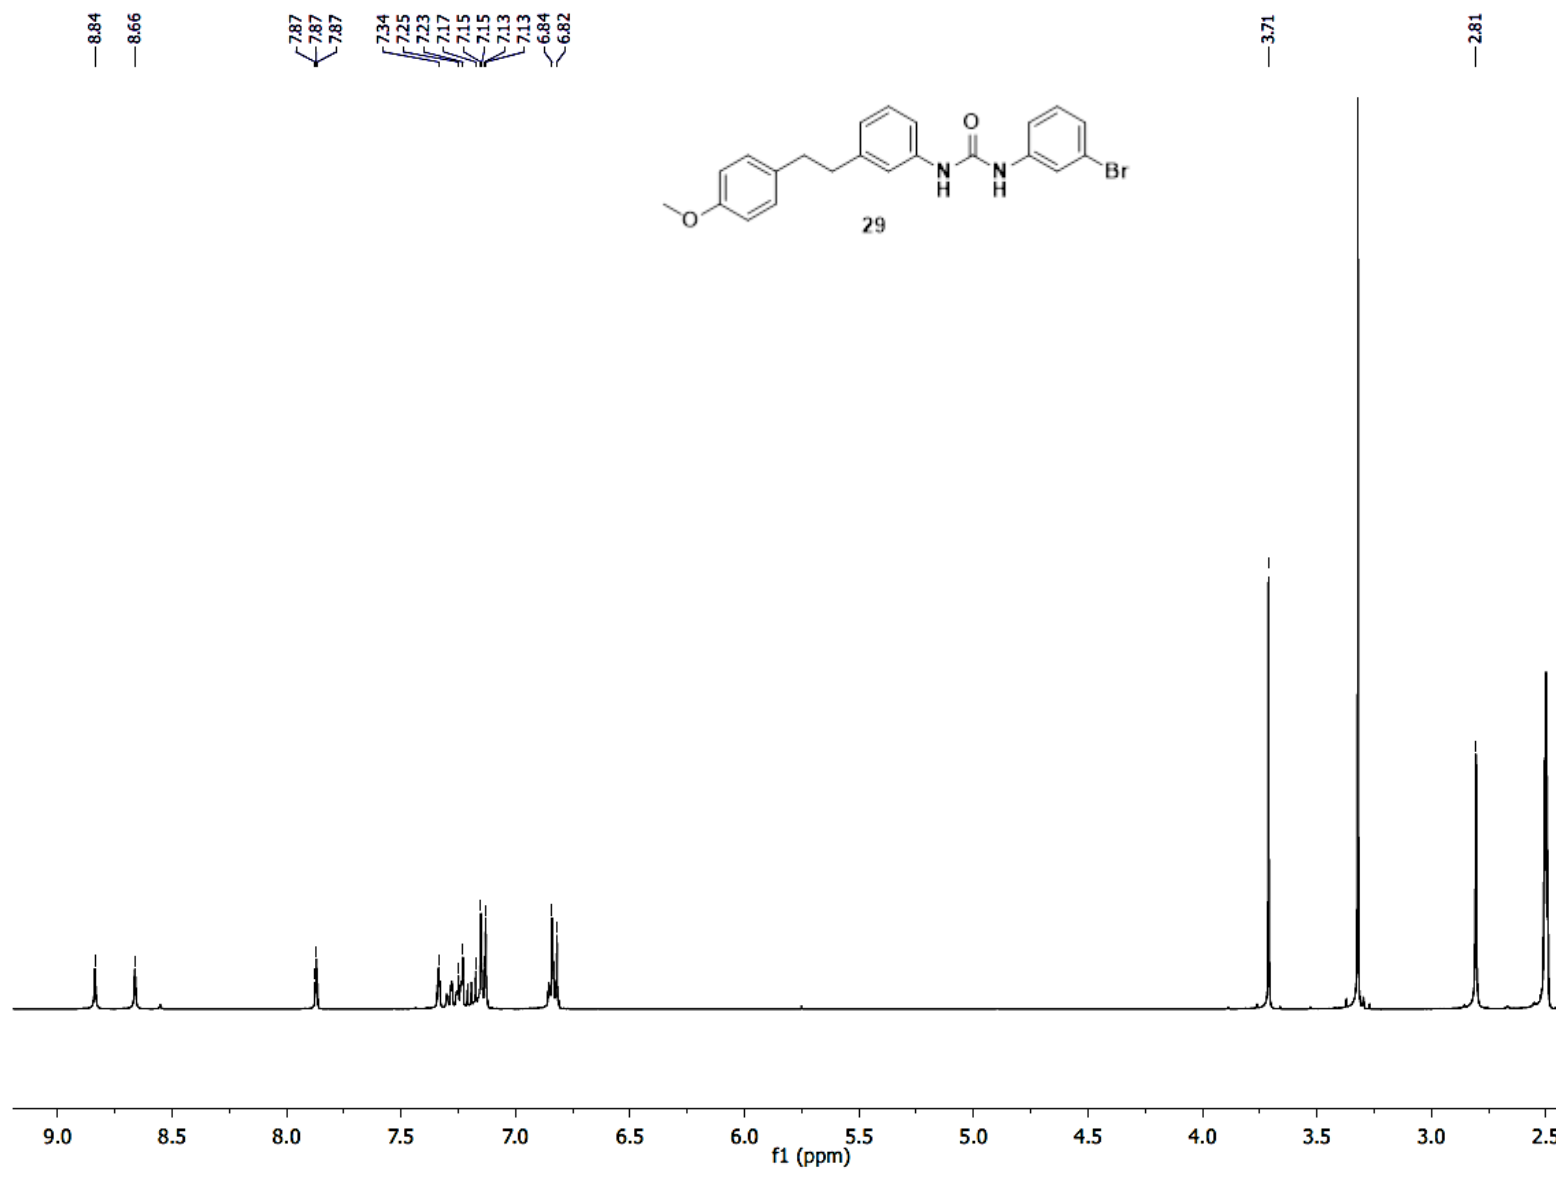

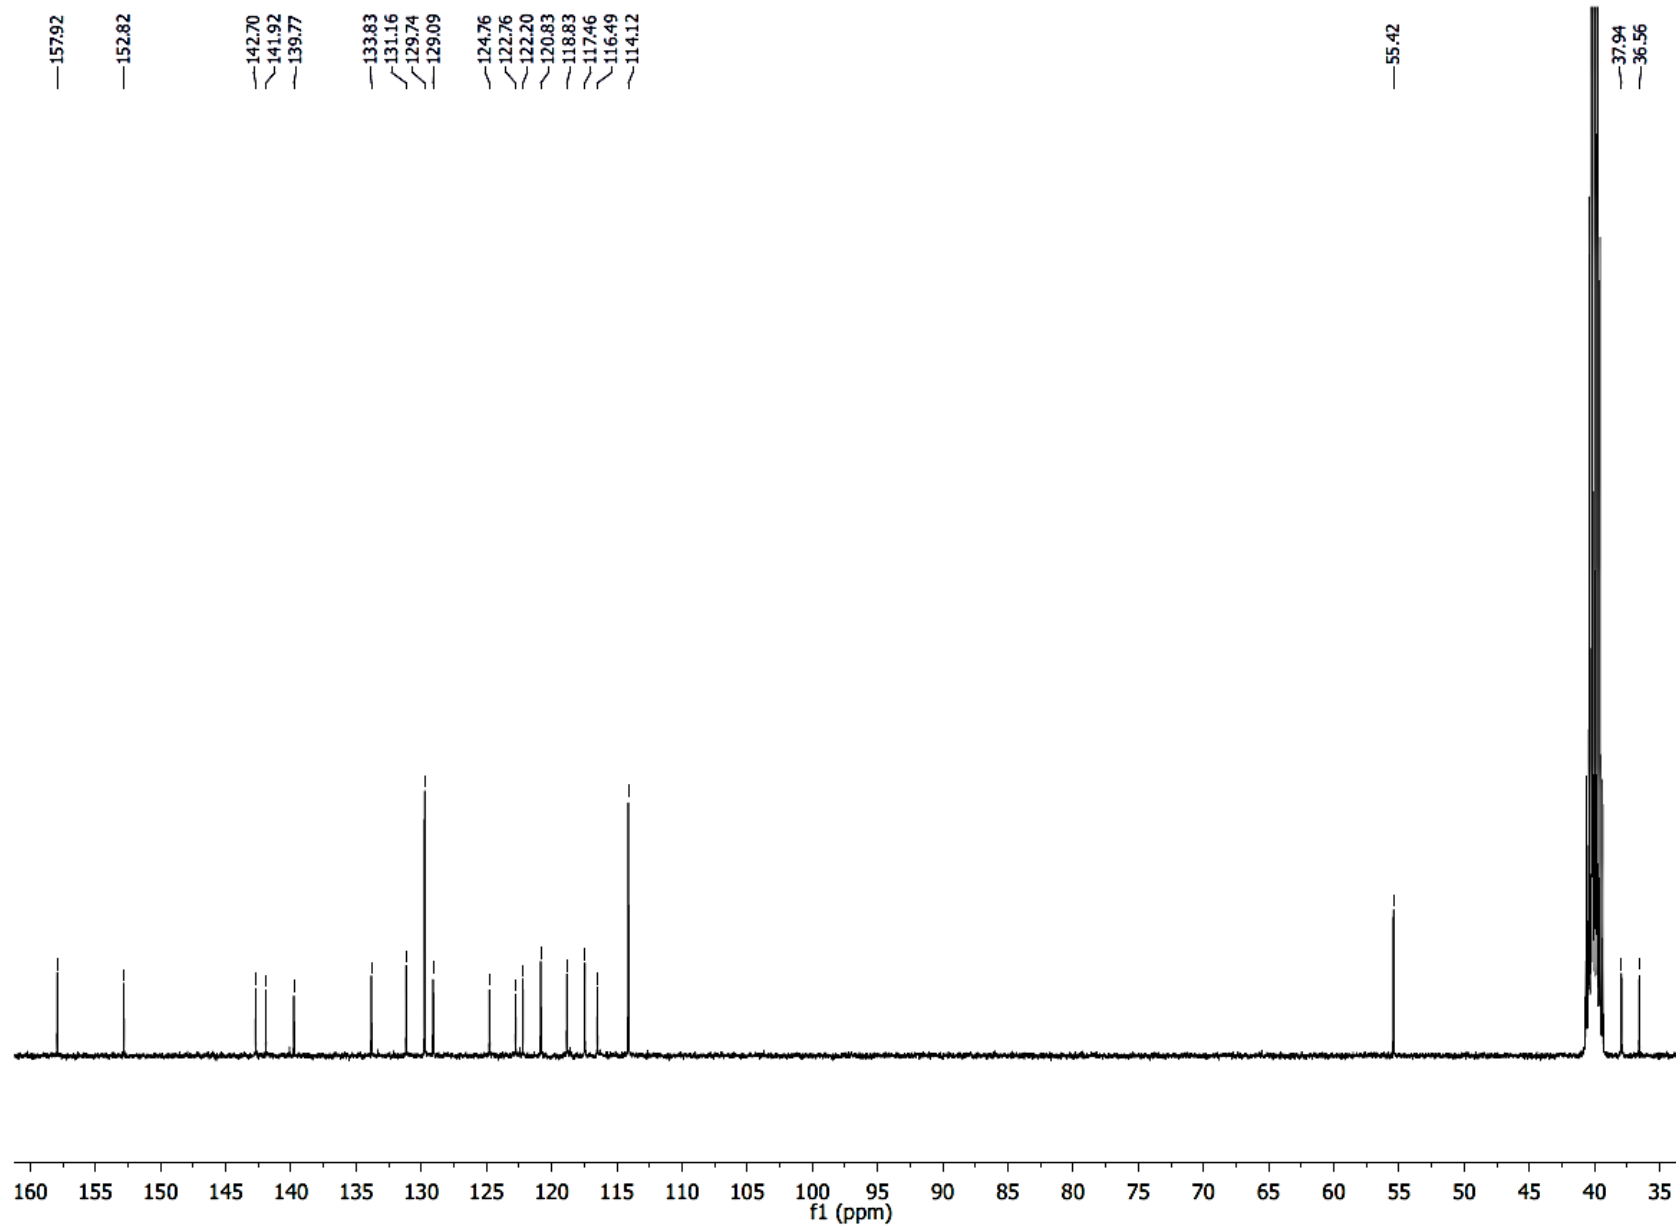

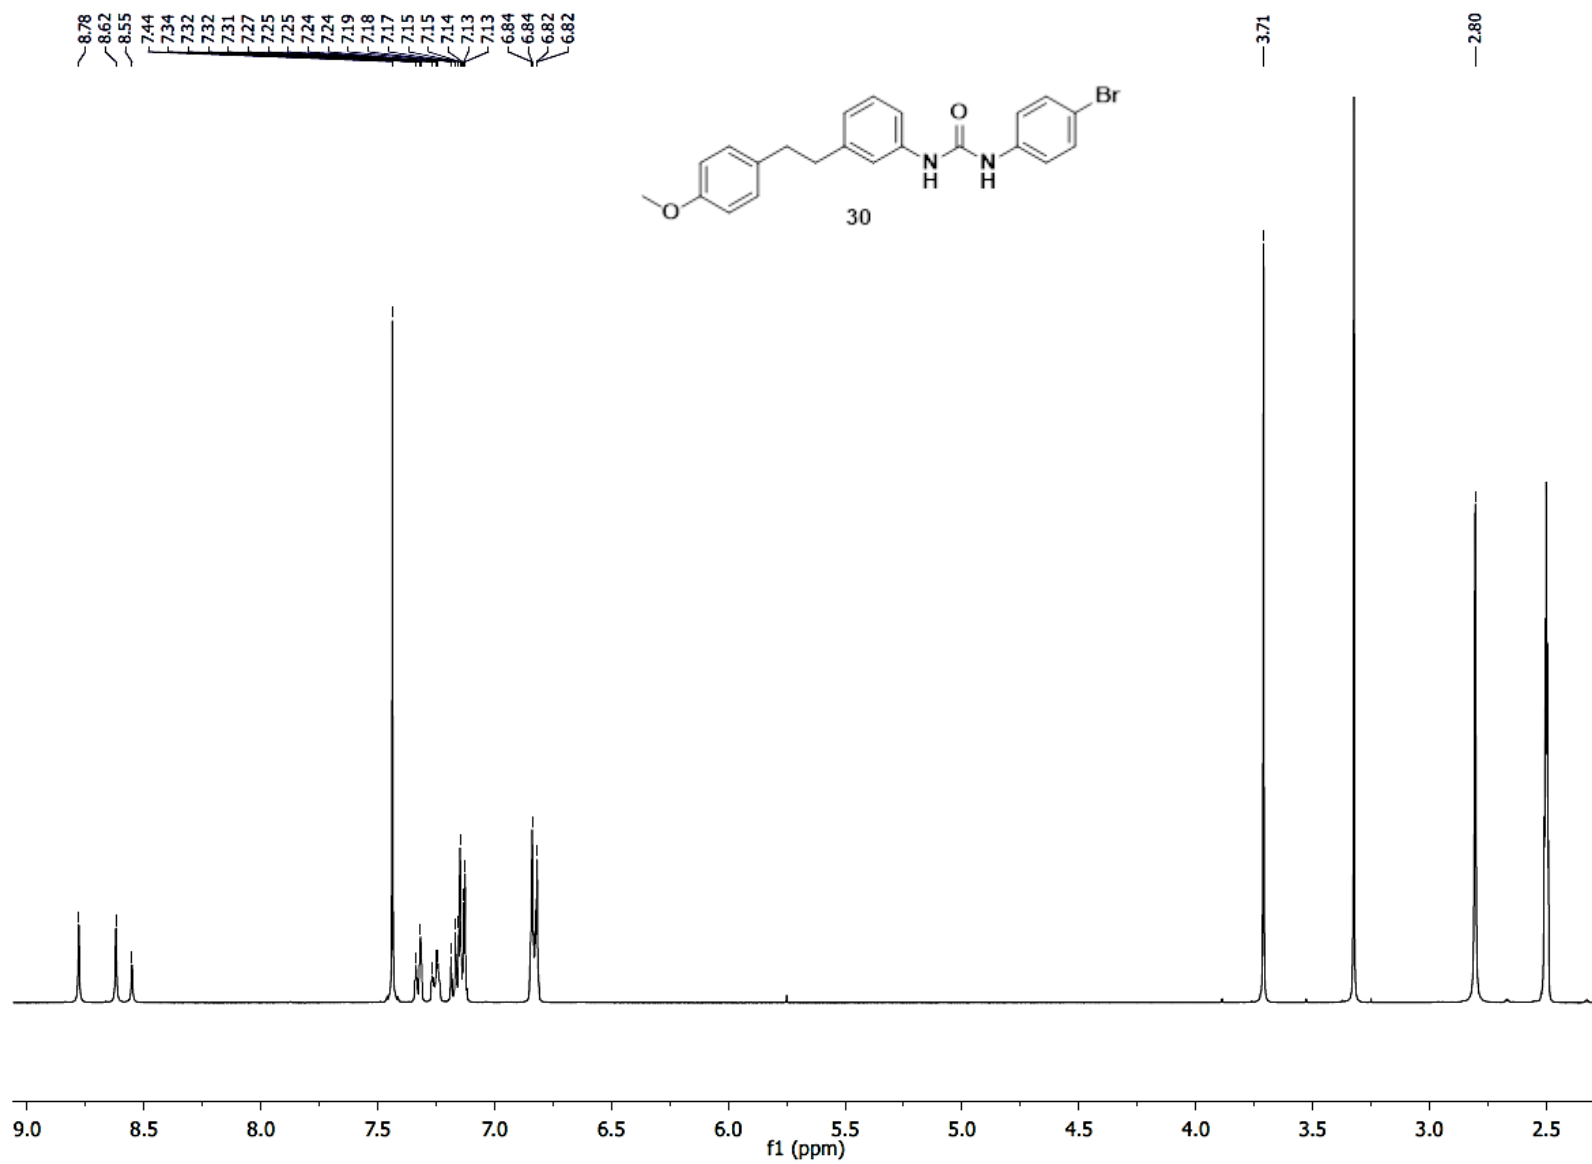

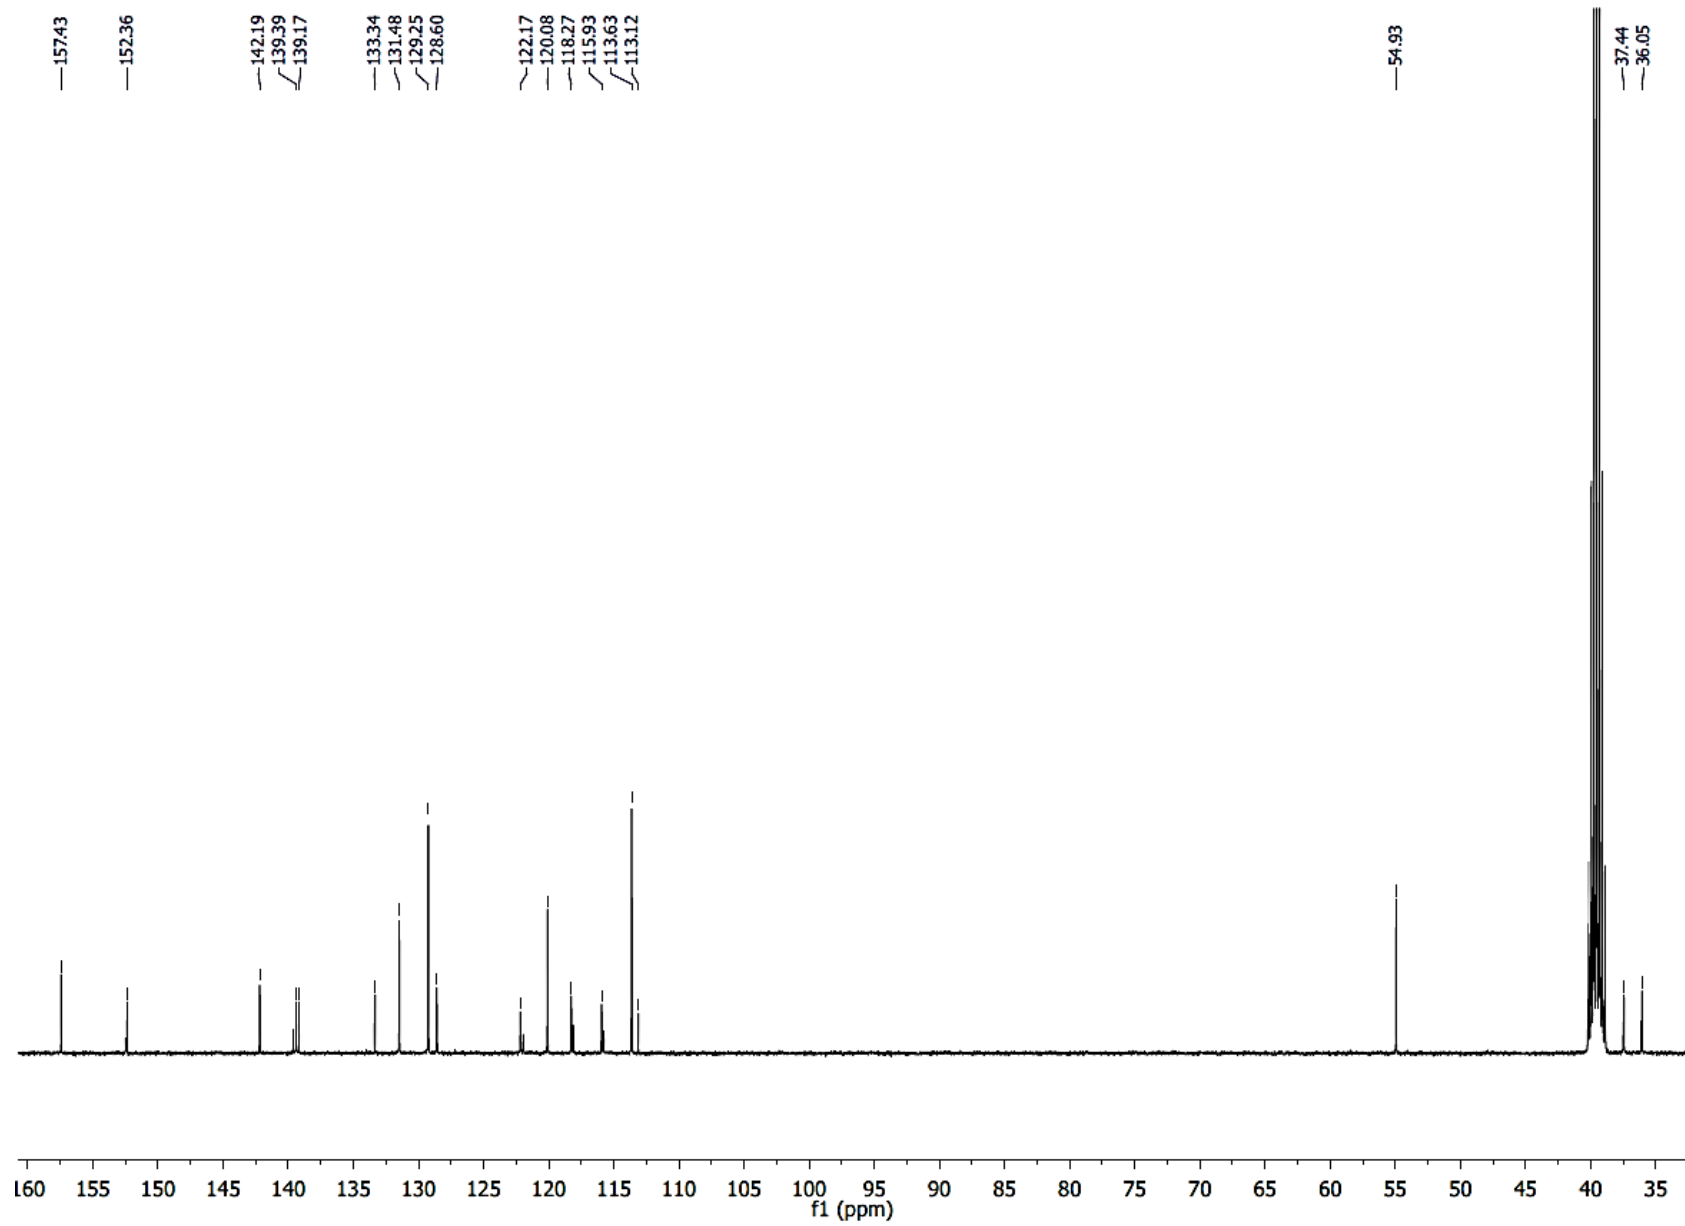

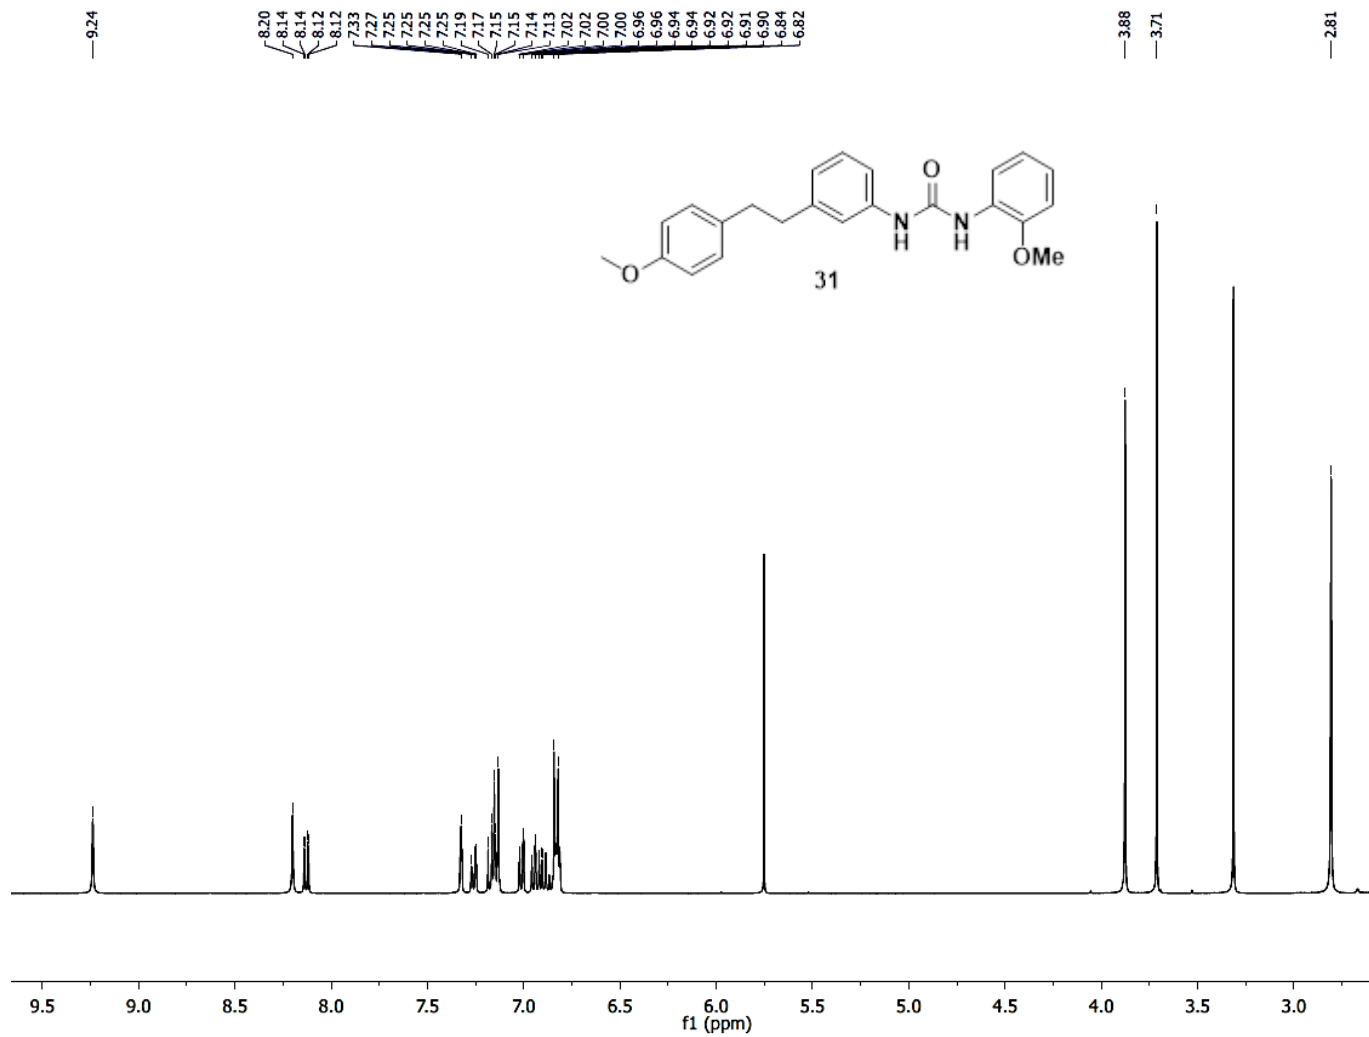

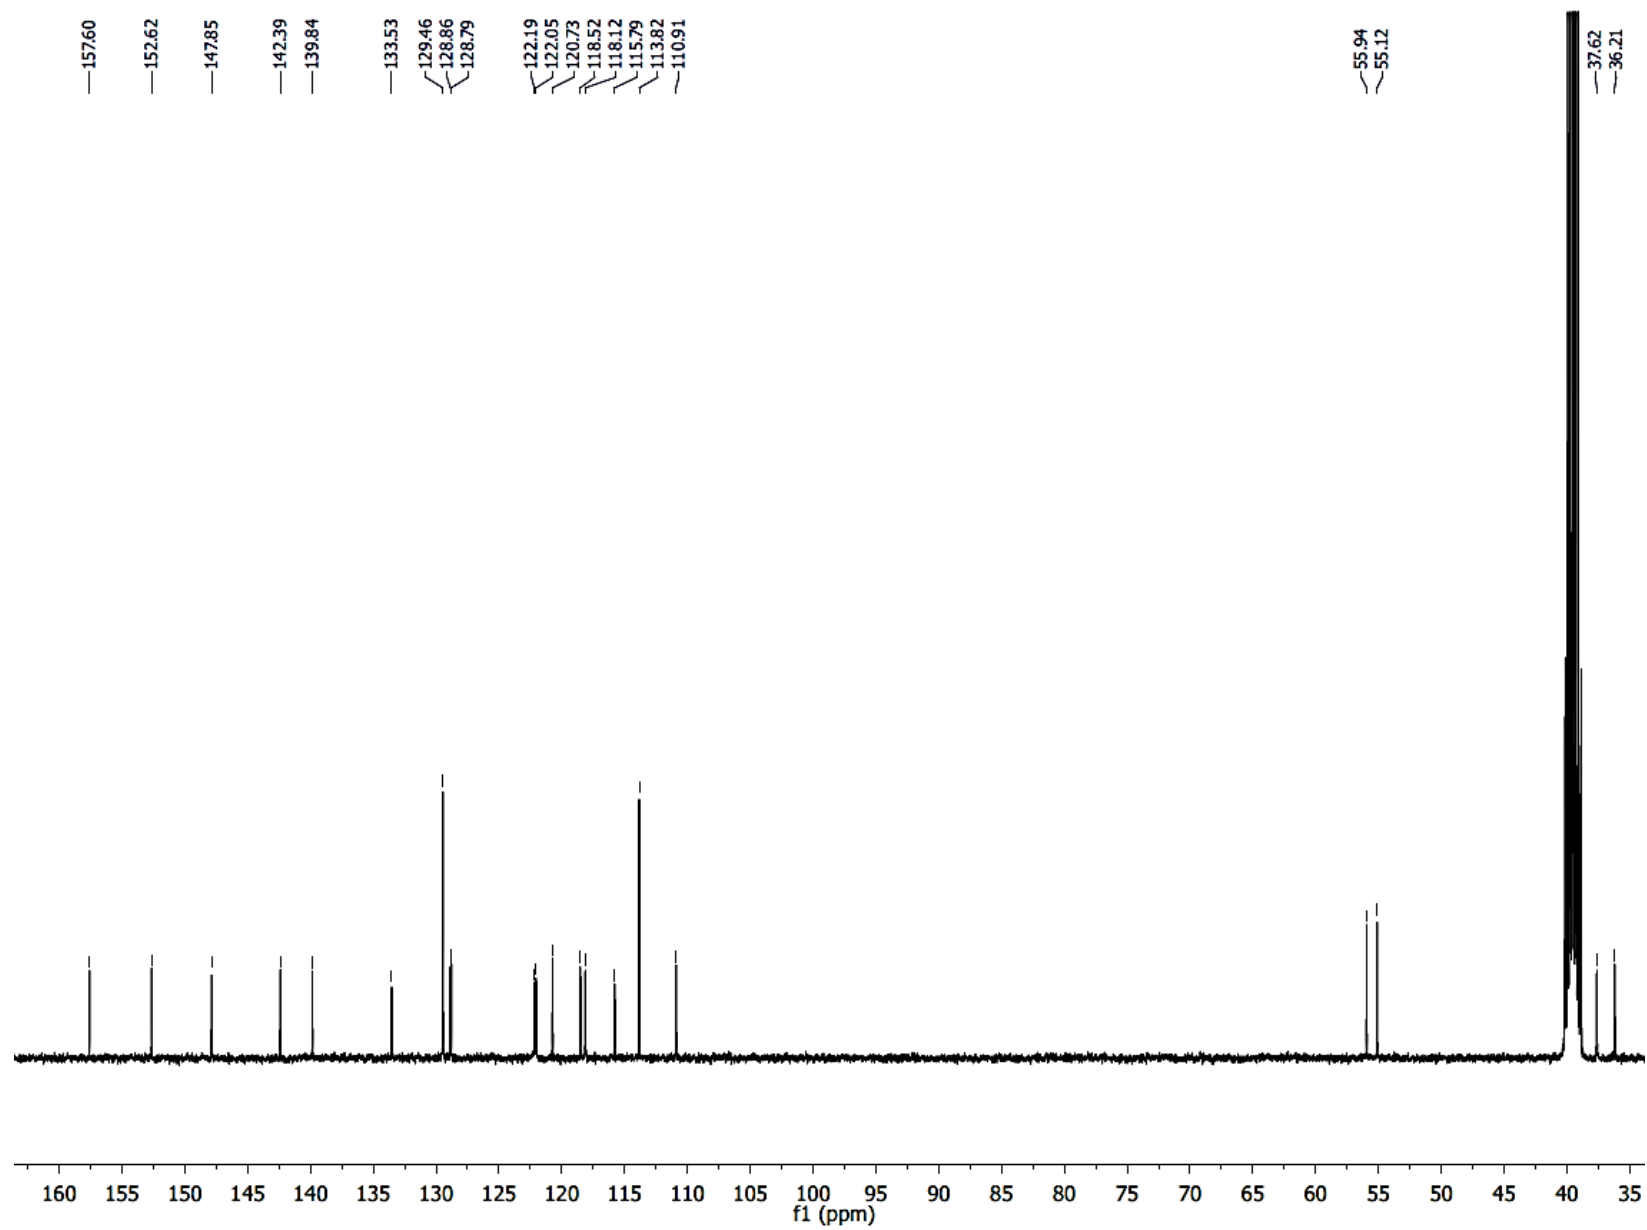

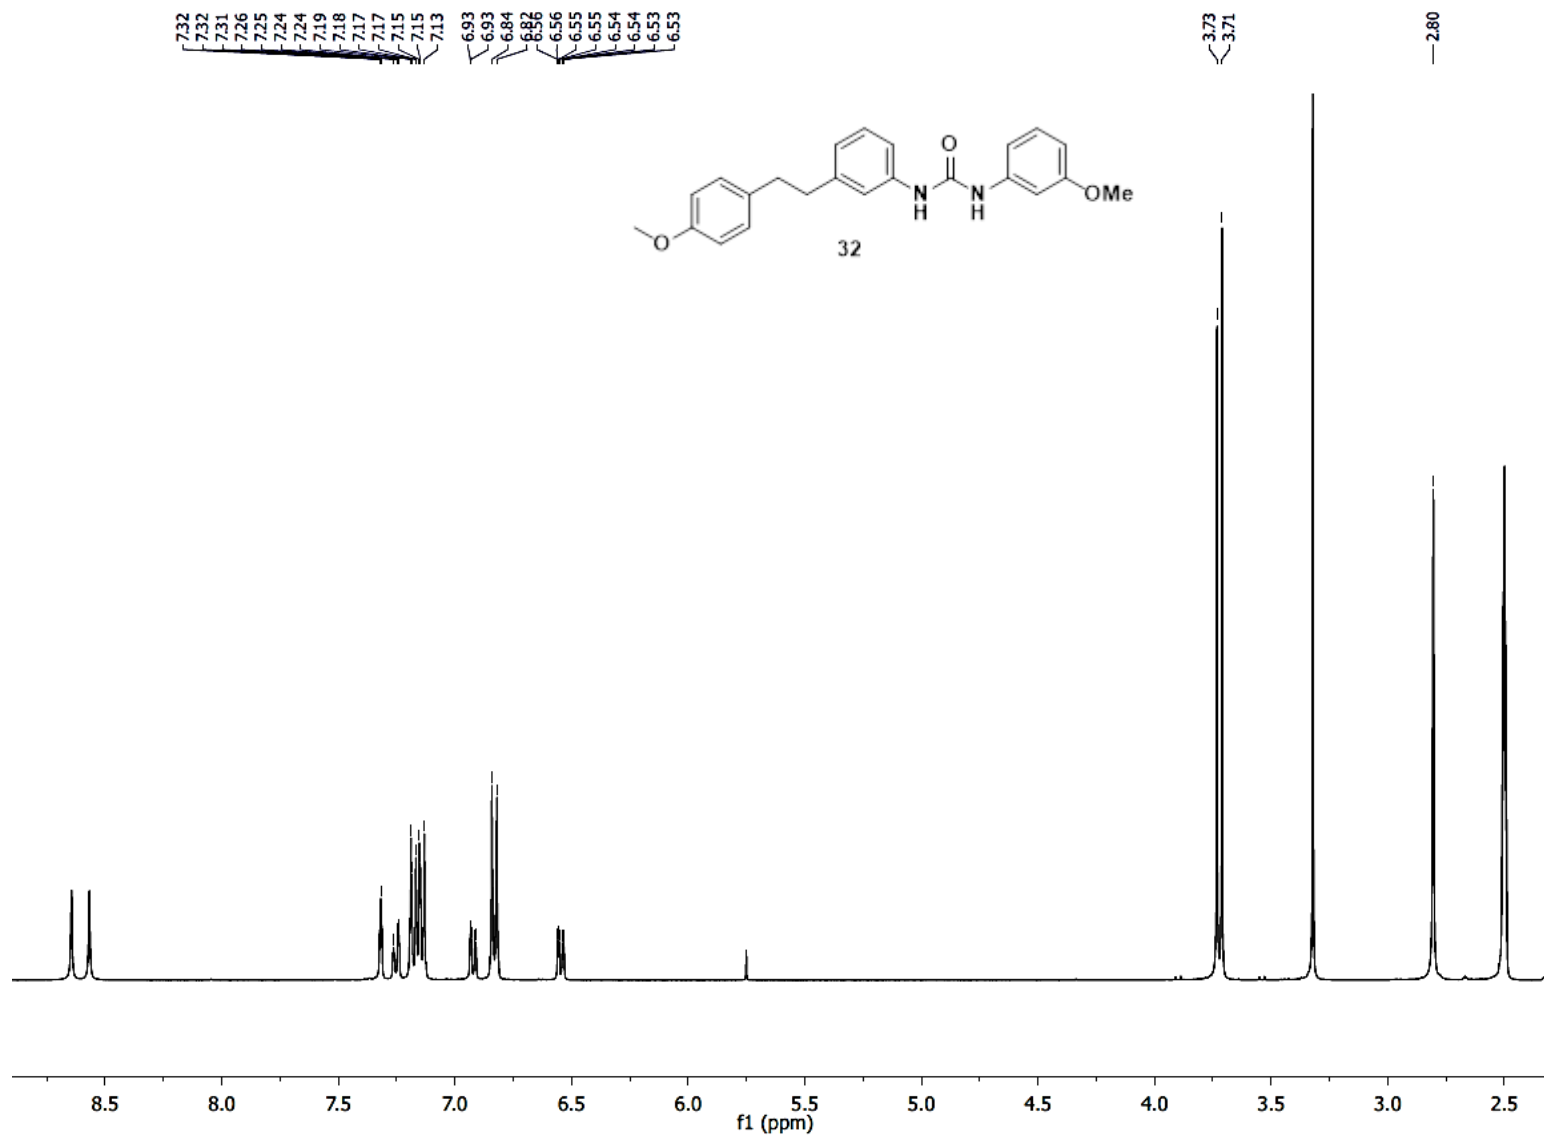



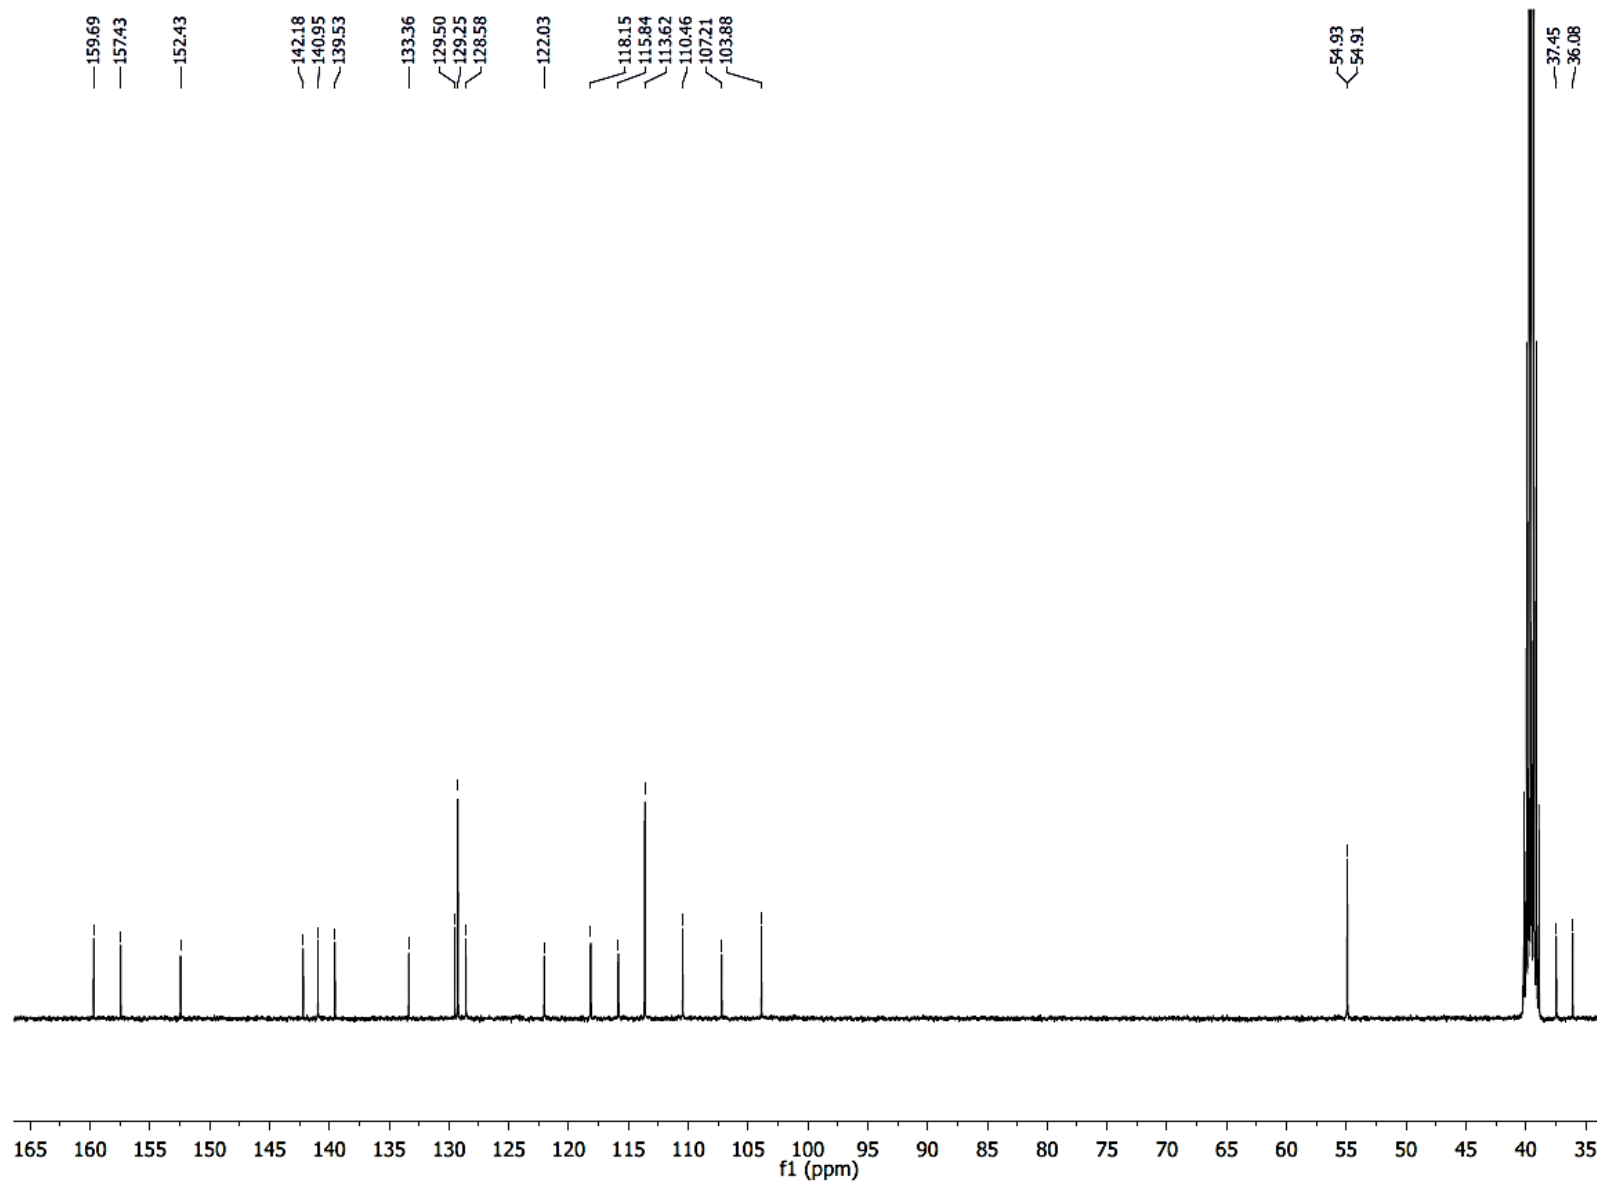

Supplement: pharmaceuticals-14-00337-s001.pdf [file pharmaceuticals-14-00337-s001.pdf]
